# Supplementary material for: Genes Responsible for H2S Production and Metabolism Are Involved in Learning and Memory in Drosophila melanogaster
Source: Biomolecules. 2022 May 26;12(6):751. doi: 10.3390/biom12060751 (PMC9221306; doi:10.3390/biom12060751)
Supplement: Supplementary file 1 [file biomolecules-12-00751-s001.zip › Table S2.xlsx]

## Sheet: Sheet 1
Symbol	Biotype	Name	Annotation	group	FlyBase gene ID		annotation from flyBase
Jon65Ai	protein_coding	Jonah 65Ai	GO:0006508 (proteolysis), GO:0004252 (serine-type endopeptidase activity)	CBS:CSE	FBgn0035667		Enables serine hydrolase activity. Predicted to be involved in proteolysis.
Amyrel	protein_coding	Amyrel	dme01100 (Metabolic pathways), dme00500 (Starch and sucrose metabolism), GO:0005975 (carbohydrate metabolic process), GO:0016160 (amylase activity), GO:0043169 (cation binding), R-DME-189085 (Drosophila melanogaster: Digestion of dietary carbohydrate), R-DME-8935690 (Drosophila melanogaster: Digestion), R-DME-8963743 (Drosophila melanogaster: Digestion and absorption)	CBS:CSE	FBgn0020506		Amyrel (Amyrel) encodes an amylolytic activity protein that is expressed mainly in larval midgut.
Dhpr	protein_coding	Dihydropteridine reductase	dme01100 (Metabolic pathways), dme00790 (Folate biosynthesis), GO:0006559 (L-phenylalanine catabolic process), GO:0006729 (tetrahydrobiopterin biosynthetic process), GO:0005737 (cytoplasm), GO:0004155 (6,7-dihydropteridine reductase activity), GO:0070402 (NADPH binding), GO:0070404 (NADH binding), R-DME-1430728 (Drosophila melanogaster: Metabolism), R-DME-71291 (Drosophila melanogaster: Metabolis…	CBS:CSE	FBgn0035964		Predicted to enable 6,7-dihydropteridine reductase activity; NADH binding activity; and NADPH binding activity. Predicted to be involved in L-phenylalanine catabolic process and tetrahydrobiopterin biosynthetic process.
CG10472	protein_coding		GO:0006508 (proteolysis), GO:0004252 (serine-type endopeptidase activity)	CBS:CSE	FBgn0035670		Enables serine hydrolase activity. Predicted to be involved in proteolysis.
Jon99Fii	protein_coding	Jonah 99Fii	GO:0006508 (proteolysis), GO:0004175 (endopeptidase activity), GO:0004252 (serine-type endopeptidase activity)	CBS:CSE	FBgn0039777		Enables serine hydrolase activity. Predicted to be involved in proteolysis
Jon65Aii	protein_coding	Jonah 65Aii	GO:0006508 (proteolysis), GO:0004252 (serine-type endopeptidase activity)	CBS:CSE	FBgn0035666		Predicted to enable serine-type endopeptidase activity. Predicted to be involved in proteolysis.
mag	protein_coding	magro	GO:0042632 (cholesterol homeostasis), GO:0044255 (cellular lipid metabolic process), GO:0070328 (triglyceride homeostasis), GO:0031410 (cytoplasmic vesicle), GO:0004771 (sterol esterase activity), GO:0016298 (lipase activity), R-DME-1266738 (Drosophila melanogaster: Developmental Biology), R-DME-6805567 (Drosophila melanogaster: Keratinization), R-DME-6809371 (Drosophila melanogaster: Formation o…	CBS:CSE	FBgn0036996		magro (mag) encodes a lipase induced by the product of Hr96 in the intestine, where it acts in the lumen to degrade dietary triglycerides for fatty acid absorption
CG7953	protein_coding			CBS:CSE	FBgn0028533		Is expressed in adult head.
Cyp6a17	protein_coding	Cytochrome P450-6a17	GO:0040040 (thermosensory behavior), GO:0055114 (oxidation-reduction process), GO:0005506 (iron ion binding), GO:0016705 (oxidoreductase activity, acting on paired donors, with incorporation or reduction of molecular oxygen), GO:0020037 (heme binding)	BE:CSE	FBgn0015714		Cytochrome P450-6a17 (Cyp6a17) encodes a member of the cytochrome P450 (CYP) family of proteins involved in the oxidation of diverse organic substrates. Cyp6a17 expression in the mushroom bodies of the brain is regulated by cAMP-dependent protein kinase (PKA) and is required for temperature preference behavior
Eip55E	protein_coding	Ecdysone-induced protein 55E	dme00260 (Glycine, serine and threonine metabolism), dme01230 (Biosynthesis of amino acids), dme01100 (Metabolic pathways), dme00450 (Selenocompound metabolism), dme00270 (Cysteine and methionine metabolism), GO:0000096 (sulfur amino acid metabolic process), GO:0006750 (glutathione biosynthetic process), GO:0019343 (cysteine biosynthetic process via cystathionine), GO:0019346 (transsulfuration), …	BE:CSE	FBgn0000566
ChLD3	protein_coding	ChLD3	GO:0005975 (carbohydrate metabolic process), GO:0006030 (chitin metabolic process), GO:0005576 (extracellular region), GO:0008061 (chitin binding), GO:0016810 (hydrolase activity, acting on carbon-nitrogen (but not peptide) bonds)	BE:CSE	FBgn0032598		Predicted to enable catalytic activity and chitin binding activity. Predicted to be involved in carbohydrate metabolic process. Is expressed in embryonic/larval posterior spiracle and presumptive embryonic/larval system
CG2065	protein_coding		GO:0052650 (NADP-retinol dehydrogenase activity), R-DME-1430728 (Drosophila melanogaster: Metabolism), R-DME-162582 (Drosophila melanogaster: Signal Transduction), R-DME-196854 (Drosophila melanogaster: Metabolism of vitamins and cofactors), R-DME-2187338 (Drosophila melanogaster: Visual phototransduction), R-DME-2453902 (Drosophila melanogaster: The canonical retinoid cycle in rods (twilight vis…	BE:CSE	FBgn0033204		Enables NADP-retinol dehydrogenase activity. Involved in retinal metabolic process. Located in endoplasmic reticulum membrane
CG42367	protein_coding		GO:0008150 (biological_process), GO:0031012 (extracellular matrix), GO:0042302 (structural constituent of cuticle)	BE:CSE	FBgn0259713		Predicted to be a structural constituent of cuticle. Predicted to be active in extracellular matrix. Is expressed in adult head
CG9733	protein_coding		GO:0006508 (proteolysis), GO:0005615 (extracellular space), GO:0004252 (serine-type endopeptidase activity)	BE:CSE	FBgn0039759		Predicted to enable serine-type endopeptidase activity. Predicted to be involved in proteolysis
PPO2	protein_coding	Prophenoloxidase 2	GO:0035006 (melanization defense response), GO:0035011 (melanotic encapsulation of foreign target), GO:0042417 (dopamine metabolic process), GO:0050830 (defense response to Gram-positive bacterium), GO:0050832 (defense response to fungus), GO:0005576 (extracellular region), GO:0005615 (extracellular space), GO:0036263 (L-DOPA monooxygenase activity), GO:0036264 (dopamine monooxygenase activity)	BE:CSE	FBgn0033367		Prophenoloxidase 2 (PPO2) encodes a protein stored in large crystals in the crystal cells (a type of hemocyte cell) that is involved in the melanization reaction. It contributes to melanization around wounds and wasp encapsulation and is thought to be activated by proteolytic cleavage by the product of Hayan.
CG4408	protein_coding		GO:0006508 (proteolysis), GO:0005615 (extracellular space), GO:0004181 (metallocarboxypeptidase activity), GO:0008270 (zinc ion binding)	BE:CSE	FBgn0039073		Predicted to enable metallocarboxypeptidase activity. Predicted to be involved in proteolysis.
				BE:CSE	FBgn0261362
CG30082	protein_coding		GO:0004252 (serine-type endopeptidase activity)	BE:CSE	FBgn0050082		Predicted to enable serine-type endopeptidase activity
Cyp4p1	protein_coding	Cytochrome P450-4p1	GO:0055114 (oxidation-reduction process), GO:0005506 (iron ion binding), GO:0016705 (oxidoreductase activity, acting on paired donors, with incorporation or reduction of molecular oxygen), GO:0020037 (heme binding), R-DME-1430728 (Drosophila melanogaster: Metabolism), R-DME-193144 (Drosophila melanogaster: Estrogen biosynthesis), R-DME-196071 (Drosophila melanogaster: Metabolism of steroid hormon…	BE:CSE	FBgn0015037		May be involved in the metabolism of insect hormones and in the breakdown of synthetic insecticides
ACXD	protein_coding	Adenylyl cyclase X D	dme00230 (Purine metabolism), dme04213 (Longevity regulating pathway - multiple species), dme01100 (Metabolic pathways), GO:0007189 (adenylate cyclase-activating G-protein coupled receptor signaling pathway), GO:0009190 (cyclic nucleotide biosynthetic process), GO:0005887 (integral component of plasma membrane), GO:0016021 (integral component of membrane), GO:0004016 (adenylate cyclase activity),…	BE:CSE	FBgn0040507		Predicted to enable adenylate cyclase activity. Predicted to be involved in adenylate cyclase-activating G protein-coupled receptor signaling pathway; adenylate cyclase-inhibiting G protein-coupled receptor signaling pathway; and cAMP biosynthetic process.
CG31097	protein_coding			BE:CSE	FBgn0051097		molecular function is unknown
CG31436	protein_coding			BE:CBS	FBgn0051436		Is expressed in wing disc.
Tsf1	protein_coding	Transferrin 1	GO:0009620 (response to fungus), GO:0042048 (olfactory behavior), GO:0005576 (extracellular region), GO:0005615 (extracellular space), GO:0005886 (plasma membrane), R-DME-109582 (Drosophila melanogaster: Hemostasis), R-DME-114608 (Drosophila melanogaster: Platelet degranulation ), R-DME-168249 (Drosophila melanogaster: Innate Immune System), R-DME-168256 (Drosophila melanogaster: Immune System), …	BE:CBS	FBgn0022355		Transferrin 1 (Tsf1) encodes an iron binding protein induced during the immune response. Iron sequestration is a classical host defense mechanism to combat bacterial infection.
Ance-5	protein_coding	Ance-5	GO:0006508 (proteolysis), GO:0005615 (extracellular space), GO:0005886 (plasma membrane), GO:0004180 (carboxypeptidase activity), GO:0008238 (exopeptidase activity), GO:0008241 (peptidyl-dipeptidase activity)	BE:CBS	FBgn0035076		Predicted to be active in extracellular space and plasma membrane
CG3513	protein_coding		GO:0004867 (serine-type endopeptidase inhibitor activity)	BE:CBS	FBgn0031559		Predicted to enable serine-type endopeptidase inhibitor activity. Orthologous to human SPINT3
lectin-28C	protein_coding	lectin-28C	GO:0004888 (transmembrane signaling receptor activity), GO:0005534 (galactose binding), GO:0030246 (carbohydrate binding)	BE:CBS	FBgn0040099		Predicted to enable galactose binding activity. Predicted to be involved in opsonization. Predicted to be located in extracellular space. Is expressed in adult heart and eye.
CG42846	protein_coding		GO:0008150 (biological_process), GO:0005575 (cellular_component), GO:0003674 (molecular_function)	BE:CBS	FBgn0262035		molecular function is unknown
Nepl11	protein_coding	Neprilysin-like 11	GO:0006508 (proteolysis), GO:0004222 (metalloendopeptidase activity), R-DME-168249 (Drosophila melanogaster: Innate Immune System), R-DME-168256 (Drosophila melanogaster: Immune System), R-DME-2022377 (Drosophila melanogaster: Metabolism of Angiotensinogen to Angiotensins), R-DME-2980736 (Drosophila melanogaster: Peptide hormone metabolism), R-DME-392499 (Drosophila melanogaster: Metabolism of pr…	BE:CBS	FBgn0037230		Predicted to be involved in protein processing. Predicted to be active in plasma membrane. Is expressed in adult head and embryonic/larval fat body. Orthologous to human KEL (Kell metallo-endopeptidase (Kell blood group)).
Nepl10	protein_coding	Neprilysin-like 10	GO:0006508 (proteolysis), GO:0004222 (metalloendopeptidase activity), R-DME-168249 (Drosophila melanogaster: Innate Immune System), R-DME-168256 (Drosophila melanogaster: Immune System), R-DME-2022377 (Drosophila melanogaster: Metabolism of Angiotensinogen to Angiotensins), R-DME-2980736 (Drosophila melanogaster: Peptide hormone metabolism), R-DME-392499 (Drosophila melanogaster: Metabolism of pr…	BE:CBS	FBgn0033742		Predicted to be involved in protein processing. Predicted to be active in plasma membrane. Orthologous to human KEL (Kell metallo-endopeptidase (Kell blood group)).
Nepl20	protein_coding	Neprilysin-like 20	GO:0006508 (proteolysis), GO:0004222 (metalloendopeptidase activity)	BE:CBS	FBgn0039613		Predicted to be involved in protein processing. Predicted to be active in plasma membrane.
Nepl14	protein_coding	Neprilysin-like 14	GO:0006508 (proteolysis), GO:0004222 (metalloendopeptidase activity), R-DME-168249 (Drosophila melanogaster: Innate Immune System), R-DME-168256 (Drosophila melanogaster: Immune System), R-DME-2022377 (Drosophila melanogaster: Metabolism of Angiotensinogen to Angiotensins), R-DME-2980736 (Drosophila melanogaster: Peptide hormone metabolism), R-DME-392499 (Drosophila melanogaster: Metabolism of pr…	BE:CBS	FBgn0039023		Predicted to be involved in protein processing. Predicted to be active in plasma membrane. Is expressed in embryonic brain; larval ventral nerve cord; and organism.
Cbs	protein_coding	Cystathionine beta-synthase	dme00260 (Glycine, serine and threonine metabolism), dme01100 (Metabolic pathways), dme01230 (Biosynthesis of amino acids), dme00270 (Cysteine and methionine metabolism), GO:0006535 (cysteine biosynthetic process from serine), GO:0008340 (determination of adult lifespan), GO:0019343 (cysteine biosynthetic process via cystathionine), GO:0019346 (transsulfuration), GO:0034976 (response to endoplasm…	BE:CBS	FBgn0031148
CG9928	protein_coding			BE:CBS	FBgn0032472		Is expressed in adult hemolymph.
Kaz1-ORFB	protein_coding	Kaz1-ORFB	GO:0005576 (extracellular region), GO:0005739 (mitochondrion)	BE:CBS	FBgn0063923		Predicted to enable serine-type endopeptidase inhibitor activity. Located in extracellular region and mitochondrion. Is expressed in several structures, including embryonic/larval midgut; embryonic/larval midgut primordium; and embryonic/larval muscle system
Cyp4ac1	protein_coding	Cyp4ac1	GO:0055114 (oxidation-reduction process), GO:0005506 (iron ion binding), GO:0016705 (oxidoreductase activity, acting on paired donors, with incorporation or reduction of molecular oxygen), GO:0020037 (heme binding), R-DME-1430728 (Drosophila melanogaster: Metabolism), R-DME-193144 (Drosophila melanogaster: Estrogen biosynthesis), R-DME-196071 (Drosophila melanogaster: Metabolism of steroid hormon…	BE:CBS	FBgn0031693		May be involved in the metabolism of insect hormones and in the breakdown of synthetic insecticides.
CG1468	protein_coding			BE:CBS	FBgn0030157		Is expressed in adult head.
CG13795	protein_coding		GO:0006836 (neurotransmitter transport), GO:0005886 (plasma membrane), GO:0016021 (integral component of membrane), GO:0043005 (neuron projection), GO:0005326 (neurotransmitter transporter activity), GO:0005328 (neurotransmitter:sodium symporter activity), GO:0005332 (gamma-aminobutyric acid:sodium symporter activity), GO:0042165 (neurotransmitter binding), R-DME-352230 (Drosophila melanogaster: …	BE:CBS	FBgn0031937		Predicted to be involved in neurotransmitter transport and sodium ion transmembrane transport. Predicted to be integral component of membrane. Predicted to be active in neuron projection. Predicted to be integral component of plasma membrane.
CG4847	protein_coding		dme04142 (Lysosome), GO:0006508 (proteolysis), GO:0032504 (multicellular organism reproduction), GO:0051603 (proteolysis involved in cellular protein catabolic process), GO:0005576 (extracellular region), GO:0005615 (extracellular space), GO:0005764 (lysosome), GO:0004197 (cysteine-type endopeptidase activity), GO:0008234 (cysteine-type peptidase activity), R-DME-1280218 (Drosophila melanogaster:…	BE:CBS	FBgn0034229		Predicted to enable cysteine-type endopeptidase activity. Involved in multicellular organism reproduction. Located in extracellular space. Is expressed in adult head; adult heart; embryonic ventral epidermis; and sensory nervous system primordium.
jtb	protein_coding	jetboil		BE:CBS	FBgn0034126		Is expressed in adult heart.
APC7	protein_coding	Anaphase Promoting Complex subunit 7	dme04120 (Ubiquitin mediated proteolysis), GO:0045842 (positive regulation of mitotic metaphase/anaphase transition), GO:0005680 (anaphase-promoting complex), GO:0061630 (ubiquitin protein ligase activity), R-DME-1280218 (Drosophila melanogaster: Adaptive Immune System), R-DME-141405 (Drosophila melanogaster: Inhibition of the proteolytic activity of APC/C required for the onset of anaphase by mi…	BE:CBS	FBgn0029879		Anaphase Promoting Complex subunit 7 (APC7) encodes a protein that associates with the anaphase promoting complex/cyclosome (APC/C).
CG13670	protein_coding		GO:0040003 (chitin-based cuticle development), GO:0031012 (extracellular matrix), GO:0008010 (structural constituent of chitin-based larval cuticle), GO:0042302 (structural constituent of cuticle)	BE:CBS	FBgn0035873		Predicted to be a structural constituent of chitin-based larval cuticle. Predicted to be involved in chitin-based cuticle development.
lncRNA:CR43417	ncRNA	long non-coding RNA:CR43417		BE:CBS	FBgn0263336		molecular function is unknown
CG7997	protein_coding		dme00600 (Sphingolipid metabolism), dme01100 (Metabolic pathways), dme00052 (Galactose metabolism), dme00561 (Glycerolipid metabolism), dme04142 (Lysosome), dme00603 (Glycosphingolipid biosynthesis - globo and isoglobo series), GO:0009311 (oligosaccharide metabolic process), GO:0016139 (glycoside catabolic process), GO:0046477 (glycosylceramide catabolic process), GO:0005737 (cytoplasm), GO:00045…	BE:CBS	FBgn0034117		Predicted to enable alpha-galactosidase activity. Predicted to be involved in glycoside catabolic process; glycosylceramide catabolic process; and oligosaccharide metabolic process. Predicted to be active in cytoplasm. Is expressed in several structures, including adult head; adult heart; embryonic/larval tracheal dorsal trunk; gut section; and squamous epithelium.
CG17224	protein_coding		dme00983 (Drug metabolism - other enzymes), dme01232 (Nucleotide metabolism), dme01100 (Metabolic pathways), dme00240 (Pyrimidine metabolism), GO:0009116 (nucleoside metabolic process), GO:0009166 (nucleotide catabolic process), GO:0005737 (cytoplasm), GO:0004850 (uridine phosphorylase activity), R-DME-1430728 (Drosophila melanogaster: Metabolism), R-DME-15869 (Drosophila melanogaster: Metabolism…	BE:CBS	FBgn0031489		Predicted to enable uridine phosphorylase activity. Predicted to be involved in uridine catabolic process. Predicted to be active in cytosol. Is expressed in amnioserosa and amnioserosa anlage.
CG30002	protein_coding		GO:0006508 (proteolysis), GO:0004252 (serine-type endopeptidase activity)	BE:CBS	FBgn0260474		Predicted to enable serine-type endopeptidase activity. Predicted to be involved in proteolysis
Ugt37B1	protein_coding	UDP-glycosyltransferase family 37 member B1	dme01100 (Metabolic pathways), dme00860 (Porphyrin metabolism), dme00040 (Pentose and glucuronate interconversions), dme00053 (Ascorbate and aldarate metabolism), dme00983 (Drug metabolism - other enzymes), dme00982 (Drug metabolism - cytochrome P450), dme00830 (Retinol metabolism), dme01240 (Biosynthesis of cofactors), dme00980 (Metabolism of xenobiotics by cytochrome P450), GO:0006011 (UDP-gluc…	BE:CBS	FBgn0026755		Predicted to enable UDP-glycosyltransferase activity. Predicted to be integral component of membrane. Predicted to be active in intracellular membrane-bounded organelle. Is expressed in adult head.
CG11594	protein_coding		GO:0005975 (carbohydrate metabolic process), GO:0034976 (response to endoplasmic reticulum stress), GO:0016773 (phosphotransferase activity, alcohol group as acceptor)	BE:CBS	FBgn0035484		Predicted to enable D-ribulokinase activity. Involved in response to endoplasmic reticulum stress.
Cyp4ac2	protein_coding	Cyp4ac2	GO:0055114 (oxidation-reduction process), GO:0005506 (iron ion binding), GO:0016705 (oxidoreductase activity, acting on paired donors, with incorporation or reduction of molecular oxygen), GO:0020037 (heme binding), R-DME-1430728 (Drosophila melanogaster: Metabolism), R-DME-193144 (Drosophila melanogaster: Estrogen biosynthesis), R-DME-196071 (Drosophila melanogaster: Metabolism of steroid hormon…	BE:CBS	FBgn0031694		May be involved in the metabolism of insect hormones and in the breakdown of synthetic insecticides.
Oat	protein_coding	Ornithine aminotransferase precursor	dme00330 (Arginine and proline metabolism), dme01100 (Metabolic pathways), GO:0006591 (ornithine metabolic process), GO:0010121 (arginine catabolic process to proline via ornithine), GO:0019544 (arginine catabolic process to glutamate), GO:0005737 (cytoplasm), GO:0005739 (mitochondrion), GO:0005759 (mitochondrial matrix), GO:0004587 (ornithine-oxo-acid transaminase activity), GO:0030170 (pyridoxa…	BE:CBS	FBgn0022774		Predicted to enable identical protein binding activity; ornithine-oxo-acid transaminase activity; and pyridoxal phosphate binding activity. Predicted to be involved in arginine catabolic process to glutamate; arginine catabolic process to proline via ornithine; and ornithine metabolic process. Located in mitochondrion. Is expressed in adult head; adult heart; amnioserosa; embryonic/larval fat bod…
Cyp6t1	protein_coding	Cyp6t1	GO:0046680 (response to DDT), GO:0046701 (insecticide catabolic process), GO:0055114 (oxidation-reduction process), GO:0005506 (iron ion binding), GO:0016705 (oxidoreductase activity, acting on paired donors, with incorporation or reduction of molecular oxygen), GO:0020037 (heme binding)	BE:CBS	FBgn0031182		May be involved in the metabolism of insect hormones and in the breakdown of synthetic insecticides.
cpx	protein_coding	complexin	GO:0007274 (neuromuscular synaptic transmission), GO:0016079 (synaptic vesicle exocytosis), GO:0046928 (regulation of neurotransmitter secretion), GO:0046929 (negative regulation of neurotransmitter secretion), GO:0050804 (regulation of synaptic transmission), GO:0051124 (synaptic growth at neuromuscular junction), GO:0005829 (cytosol), GO:0016020 (membrane), GO:0031201 (SNARE complex), GO:003159…	BE:CBS	FBgn0041605		complexin (cpx) encodes a presynaptic cytosolic protein that regulates SNARE complex assembly and fuction. It has both positive and negative roles in synaptic transmission, serving as the synaptic vesicle fusion clamp and as an activator of evoked release.
Gba1b	protein_coding	Glucocerebrosidase 1b	dme01100 (Metabolic pathways), dme00511 (Other glycan degradation), dme04142 (Lysosome), dme00600 (Sphingolipid metabolism), GO:0006680 (glucosylceramide catabolic process), GO:0007613 (memory), GO:0008340 (determination of adult lifespan), GO:0008344 (adult locomotory behavior), GO:0034620 (cellular response to unfolded protein), GO:0070050 (neuron cellular homeostasis), GO:0004348 (glucosylcera…	BE:CBS	FBgn0051414		Encodes a lysosomal acid beta glucocerebrosidase that catalyzes the hydrolysis of glucosylceramide to ceramide and glucose
cpo	protein_coding	couch potato	GO:0007268 (synaptic transmission), GO:0022611 (dormancy process), GO:0035206 (regulation of hemocyte proliferation), GO:0005634 (nucleus), GO:0003729 (mRNA binding)	BE:CBS	FBgn0263995		couch potato (cpo) is most strongly expressed in nuclei of the central and peripheral nervous systems and the ring gland, where its product may regulate gene transcription to control complex neurological and neuroendocrine functions. It is required for normal synaptic transmission, climate adaptation, olfaction, diapause and behavioral responses.
Nepl6	protein_coding	Neprilysin-like 6	GO:0006508 (proteolysis), GO:0005575 (cellular_component), GO:0004222 (metalloendopeptidase activity), R-DME-168249 (Drosophila melanogaster: Innate Immune System), R-DME-168256 (Drosophila melanogaster: Immune System), R-DME-2022377 (Drosophila melanogaster: Metabolism of Angiotensinogen to Angiotensins), R-DME-2980736 (Drosophila melanogaster: Peptide hormone metabolism), R-DME-392499 (Drosophi…	BE:CBS	FBgn0259716		Predicted to be involved in protein processing. Predicted to be active in plasma membrane.
fend	protein_coding	forked end	GO:0008045 (motor neuron axon guidance)	BE:CBS	FBgn0030090		forked end (fend) encodes a transmembrane protein that contributes to selective target selection in the neuromuscular system.
CG30083	protein_coding		GO:0006508 (proteolysis), GO:0005615 (extracellular space), GO:0004252 (serine-type endopeptidase activity)	BE:CBS	FBgn0050083		Predicted to enable serine-type endopeptidase activity. Predicted to be involved in proteolysis. Predicted to be active in extracellular space.
CG31075	protein_coding		dme00071 (Fatty acid degradation), dme01100 (Metabolic pathways), dme00280 (Valine, leucine and isoleucine degradation), dme00053 (Ascorbate and aldarate metabolism), dme00620 (Pyruvate metabolism), dme01240 (Biosynthesis of cofactors), dme00561 (Glycerolipid metabolism), dme00010 (Glycolysis / Gluconeogenesis), dme00410 (beta-Alanine metabolism), dme00310 (Lysine degradation), dme00981 (Insect h…	BE:CBS	FBgn0051075		Predicted to enable aldehyde dehydrogenase (NAD+) activity. Predicted to be involved in pyruvate metabolic process. Predicted to be located in mitochondrion. Is expressed in adult head and organism.
lncRNA:CR33942	ncRNA	long non-coding RNA:CR33942		BE:CBS	FBgn0062961		Its molecular function is unknown.
Bsg	protein_coding	Basigin	GO:0007156 (homophilic cell adhesion via plasma membrane adhesion molecules), GO:0007411 (axon guidance), GO:0008594 (photoreceptor cell morphogenesis), GO:0045214 (sarcomere organization), GO:0051643 (endoplasmic reticulum localization), GO:0051646 (mitochondrion localization), GO:0051647 (nucleus localization), GO:0070593 (dendrite self-avoidance), GO:0072659 (protein localization to plasma mem…	BE:CBS	FBgn0261822		Basigin (Bsg) encodes an IgG family glycoprotein that promotes cytoskeletal rearrangements and lamellipodia formation in cultured insect cells. It contributes to photoreceptor cell morphogenesis, sarcomere organization and spermatid development.
Syt1	protein_coding	Synaptotagmin 1	GO:0007268 (synaptic transmission), GO:0007269 (neurotransmitter secretion), GO:0007317 (regulation of pole plasm oskar mRNA localization), GO:0008345 (larval locomotory behavior), GO:0014059 (regulation of dopamine secretion), GO:0016079 (synaptic vesicle exocytosis), GO:0016192 (vesicle-mediated transport), GO:0017156 (calcium ion-dependent exocytosis), GO:0017158 (regulation of calcium ion-dep…	BE:CBS	FBgn0004242		Synaptotagmin 1 (Syt1) encodes a synaptic vesicle calcium binding protein that functions as the fast calcium sensor for neurotransmitter release at synapses.
CG1092	protein_coding		GO:0005575 (cellular_component), GO:0003674 (molecular_function)	BE:CBS	FBgn0037228		Is expressed in embryonic/larval fat body; embryonic/larval plasmatocyte; and plasmatocyte primordium.
nrv3	protein_coding	nervana 3	GO:0006883 (cellular sodium ion homeostasis), GO:0007605 (sensory perception of sound), GO:0010996 (response to auditory stimulus), GO:0030007 (cellular potassium ion homeostasis), GO:0036376 (sodium ion export from cell), GO:1990573 (NA), GO:0005890 (sodium:potassium-exchanging ATPase complex), GO:0001671 (ATPase activator activity), GO:0005391 (sodium:potassium-exchanging ATPase activity), R-DM…	BE:CBS	FBgn0032946		nervana 3 (nrv3) encodes one of three beta subunits of the sodium-potassium pump (ATPalpha). nrv3 is expressed in the nervous system, including subsets of the CNS and Johnston's organ neurons, and is required for hearing
CG3638	protein_coding		GO:0006821 (chloride transport), GO:0005886 (plasma membrane), GO:0005229 (intracellular calcium activated chloride channel activity), GO:0005254 (chloride channel activity), GO:0072320 (volume-sensitive chloride channel activity), R-DME-2672351 (Drosophila melanogaster: Stimuli-sensing channels), R-DME-382551 (Drosophila melanogaster: Transport of small molecules), R-DME-983712 (Drosophila melan…	BE:CBS	FBgn0261444		Probable chloride channel.
shep	protein_coding	alan shepard	GO:0007552 (metamorphosis), GO:0008050 (female courtship behavior), GO:0008344 (adult locomotory behavior), GO:0009629 (response to gravity), GO:0016322 (neuron remodeling), GO:0034976 (response to endoplasmic reticulum stress), GO:0042332 (gravitaxis), GO:0005634 (nucleus), GO:0005737 (cytoplasm), GO:0005829 (cytosol), GO:1990904 (NA), GO:0003723 (RNA binding), GO:0003729 (mRNA binding), GO:0003…	BE:CBS	FBgn0052423		alan shepard (shep) encodes an evolutionarily conserved RNA/DNA binding protein that regulates alternative splicing and gypsy insulator activities. It regulates neural development during the embryonic and larval stages, and neuronal remodeling during metamorphosis.
CG34331	protein_coding			BE:CBS	FBgn0085360		Its molecular function is unknown
Hipk	protein_coding	Homeodomain interacting protein kinase	GO:0006468 (protein phosphorylation), GO:0008586 (imaginal disc-derived wing vein morphogenesis), GO:0008587 (imaginal disc-derived wing margin morphogenesis), GO:0010628 (positive regulation of gene expression), GO:0018105 (peptidyl-serine phosphorylation), GO:0018107 (peptidyl-threonine phosphorylation), GO:0035331 (negative regulation of hippo signaling), GO:0042332 (gravitaxis), GO:0043067 (r…	BE:CBS	FBgn0035142		It plays roles in development, proliferation and patterning of many tissues, including the eye, wing, and the embryo. It can modulate signaling pathways including Wingless, Notch, Hippo, Hedgehog, JNK, and cell death.Homeodomain interacting protein kinase (Hipk) encodes a protein that belongs to the DYRK family kinases.
fbp	protein_coding	fructose-1,6-bisphosphatase	dme00051 (Fructose and mannose metabolism), dme01100 (Metabolic pathways), dme01200 (Carbon metabolism), dme00010 (Glycolysis / Gluconeogenesis), dme00030 (Pentose phosphate pathway), GO:0005986 (sucrose biosynthetic process), GO:0006000 (fructose metabolic process), GO:0006002 (fructose 6-phosphate metabolic process), GO:0006094 (gluconeogenesis), GO:0030388 (fructose 1,6-bisphosphate metabolic …	BE:CBS	FBgn0032820		Predicted to be involved in several processes, including fructose 1,6-bisphosphate metabolic process; hexose metabolic process; and sucrose biosynthetic process. Predicted to be active in cytosol. Is expressed in several structures, including circulatory system; embryonic/larval fat body; embryonic/larval muscle cell; germ layer derivative; and visceral muscle primordium.
CG18473	protein_coding		GO:0009056 (catabolic process), GO:0005575 (cellular_component), GO:0008270 (zinc ion binding), GO:0016788 (hydrolase activity, acting on ester bonds)	BE:CBS	FBgn0037683		Predicted to enable hydrolase activity, acting on ester bonds and zinc ion binding activity.
Ance-4	protein_coding	Ance-4	GO:0006508 (proteolysis), GO:0005615 (extracellular space), GO:0005886 (plasma membrane), GO:0008237 (metallopeptidase activity), GO:0008238 (exopeptidase activity), GO:0008239 (dipeptidyl-peptidase activity), GO:0008241 (peptidyl-dipeptidase activity), R-DME-2022377 (Drosophila melanogaster: Metabolism of Angiotensinogen to Angiotensins), R-DME-2980736 (Drosophila melanogaster: Peptide hormone m…	BE:CBS	FBgn0033366		Predicted to be active in extracellular space and plasma membrane. Is expressed in amnioserosa; embryonic/larval crystal cell; and procrystal cell.
CG43351	protein_coding		GO:0008150 (biological_process), GO:0005575 (cellular_component), GO:0003674 (molecular_function)	BE:CBS	FBgn0263083		Its molecular function is unknown
Tob	protein_coding	Transducer of ERBB2	dme03018 (RNA degradation), GO:0007616 (long-term memory), GO:0010468 (regulation of gene expression), GO:0051259 (protein oligomerization), GO:0005634 (nucleus), GO:0005737 (cytoplasm), GO:0044297 (cell body), GO:0097060 (synaptic membrane), GO:0003714 (transcription corepressor activity), GO:0005515 (protein binding)	BE:CBS	FBgn0028397		Tob (Tob) encodes a protein involved in long-term memory. [Date last reviewed: 2019-09-19]
Iris	protein_coding	Iris	GO:0008150 (biological_process), GO:0005575 (cellular_component), GO:0003674 (molecular_function)	BE:CBS	FBgn0031305		Is expressed in adult head and organism.
Mtp	protein_coding	Microsomal triacylglycerol transfer protein	GO:0006869 (lipid transport), GO:0008039 (synaptic target recognition), GO:0035149 (lumen formation, open tracheal system), GO:0042157 (lipoprotein metabolic process), GO:0048813 (dendrite morphogenesis), GO:0005783 (endoplasmic reticulum), GO:0005794 (Golgi apparatus), GO:0012505 (endomembrane system), GO:0016323 (basolateral plasma membrane), GO:0005548 (phospholipid transporter activity), GO:0…	BE:CBS	FBgn0266369		Encodes a phosphatidylcholine transporter involved in lipoprotein metabolism, tracheal system lumen formation and neuron development.
CCHa2	protein_coding	CCHamide-2	GO:0007218 (neuropeptide signaling pathway), GO:0005615 (extracellular space), GO:0005184 (neuropeptide hormone activity)	BE:CBS	FBgn0038147		Ligand for the CCHamide-2 receptor CCHa2-R. In one study, shown to be an orexigenic peptide which induces appetite and stimulates food intake, leading to the release of insulin-like peptides which stimulate growth. In another study, shown to be a nutrient-sensitive peptide derived from peripheral tissues which controls growth by directly regulating the production and release of insulin-like pepti…
CG8586	protein_coding		GO:0006508 (proteolysis), GO:0005576 (extracellular region), GO:0005615 (extracellular space), GO:0004252 (serine-type endopeptidase activity)	BE:CBS	FBgn0033320		Predicted to be involved in proteolysis.
CG9766	protein_coding			BE:CBS	FBgn0037229		Its molecular function is unknown
pug	protein_coding	pugilist	dme01240 (Biosynthesis of cofactors), dme00670 (One carbon pool by folate), dme01100 (Metabolic pathways), GO:0008652 (cellular amino acid biosynthetic process), GO:0009113 (purine nucleobase biosynthetic process), GO:0009257 (10-formyltetrahydrofolate biosynthetic process), GO:0055114 (oxidation-reduction process), GO:0005737 (cytoplasm), GO:0004329 (formate-tetrahydrofolate ligase activity), GO…	BE:CBS	FBgn0020385		pugilist (pug) encodes the trifunctional enzyme methylenetetrahydrofolate dehydrogenase involved in the pigmentation of pteridines and ommochromes. [
SK	protein_coding	small conductance calcium-activated potassium channel	GO:0006813 (potassium ion transport), GO:0016057 (regulation of membrane potential in photoreceptor cell), GO:0071805 (potassium ion transmembrane transport), GO:0005886 (plasma membrane), GO:0016021 (integral component of membrane), GO:0043005 (neuron projection), GO:0043025 (neuronal cell body), GO:0005516 (calmodulin binding), GO:0009881 (photoreceptor activity), GO:0016286 (small conductance …	BE:CBS	FBgn0029761		Forms a voltage-independent potassium channel activated by intracellular calcium. Activation is followed by membrane hyperpolarization. Thought to regulate neuronal excitability by contributing to the slow component of synaptic afterhyperpolarization. The channel is blocked by apamin (By similarity).
larp	protein_coding	La related protein	GO:0000001 (mitochondrion inheritance), GO:0007053 (spindle assembly involved in male meiosis), GO:0007140 (male meiosis), GO:0035186 (syncytial blastoderm mitotic cell cycle), GO:0005737 (cytoplasm), GO:0005739 (mitochondrion), GO:0005829 (cytosol)	BE:CBS	FBgn0261618		Encodes a protein that associates and interacts with poly(A)-binding protein. It is required for multiple processes in male meiosis and syncytial embryo development.
			GO:0006570 (tyrosine metabolic process), GO:0005887 (integral component of plasma membrane), GO:0004447 (iodide peroxidase activity), GO:0016491 (oxidoreductase activity), R-DME-1430728 (Drosophila melanogaster: Metabolism), R-DME-209776 (Drosophila melanogaster: Metabolism of amine-derived hormones), R-DME-209968 (Drosophila melanogaster: Thyroxine biosynthesis), R-DME-71291 (Drosophila melanoga…	BE:CBS	FBgn0036125
elav	protein_coding	embryonic lethal abnormal vision	GO:0007281 (germ cell development), GO:0007319 (negative regulation of oskar mRNA translation), GO:0007399 (nervous system development), GO:0007417 (central nervous system development), GO:0009792 (embryo development ending in birth or egg hatching), GO:0031441 (negative regulation of mRNA 3'-end processing), GO:0005634 (nucleus), GO:0015030 (Cajal body), GO:0000900 (translation repressor activit…	BE:CBS	FBgn0260400		embryonic lethal abnormal vision (elav) encodes the founding member of a family of prototype RNA binding proteins homologous to human Hu proteins, and acting as gene-specific regulators of many aspects of mRNA processing. Drosophila has three members in this family, elav, fne and Rbp9, which are predominantly pan-neuronal. elav has roles in axon guidance, synapse formation and photoreceptor diffe…
CG14107	protein_coding			BE:CBS	FBgn0036351		Is expressed in larval foregut atrium and presumptive embryonic/larval system.
Gel	protein_coding	Gelsolin	GO:0030041 (actin filament polymerization), GO:0005576 (extracellular region), GO:0005829 (cytosol), GO:0005884 (actin filament), GO:0051015 (actin filament binding), R-DME-109581 (Drosophila melanogaster: Apoptosis), R-DME-111465 (Drosophila melanogaster: Apoptotic cleavage of cellular proteins), R-DME-168249 (Drosophila melanogaster: Innate Immune System), R-DME-168256 (Drosophila melanogaster:…	BE:CBS	FBgn0010225		Calcium-regulated, actin-modulating protein that binds to the plus (or barbed) ends of actin monomers or filaments, preventing monomer exchange (end-blocking or capping). It can promote the assembly of monomers into filaments (nucleation) as well as sever filaments already formed.
CG11158	protein_coding			BE:CBS	FBgn0030511		Is expressed in embryonic/larval muscle system; embryonic/larval somatic muscle cell; somatic muscle primordium; and visceral muscle primordium.
CG42369	protein_coding		GO:0008150 (biological_process), GO:0005575 (cellular_component), GO:0003674 (molecular_function)	BE:CBS	FBgn0259715		It is involved in the biological process
CG4335	protein_coding		dme01100 (Metabolic pathways), dme00310 (Lysine degradation), GO:0045329 (carnitine biosynthetic process), GO:0055114 (oxidation-reduction process), GO:0005739 (mitochondrion), GO:0005506 (iron ion binding), GO:0016702 (oxidoreductase activity, acting on single donors with incorporation of molecular oxygen, incorporation of two atoms of oxygen), GO:0050353 (trimethyllysine dioxygenase activity), …	BE:CBS	FBgn0038795		Predicted to enable trimethyllysine dioxygenase activity. Predicted to be involved in carnitine biosynthetic process. Predicted to be active in mitochondrion. Human ortholog(s) of this gene implicated in autistic disorder. Orthologous to human TMLHE (trimethyllysine hydroxylase, epsilon).
tutl	protein_coding	turtle	GO:0007156 (homophilic cell adhesion via plasma membrane adhesion molecules), GO:0007411 (axon guidance), GO:0007414 (axonal defasciculation), GO:0007629 (flight behavior), GO:0007638 (mechanosensory behavior), GO:0008039 (synaptic target recognition), GO:0008344 (adult locomotory behavior), GO:0016199 (axon midline choice point recognition), GO:0030537 (larval behavior), GO:0045467 (R7 cell deve…	BE:CBS	FBgn0010473		turtle (tutl) encodes an Ig-superfamily transmembrane protein. Its roles include axonal tiling, dendrite self-avoidance, axonal pathfinding and coordinated motor control.
Galphao	protein_coding	G protein alpha o subunit	GO:0001737 (establishment of imaginal disc-derived wing hair orientation), GO:0007186 (G-protein coupled receptor signaling pathway), GO:0007188 (adenylate cyclase-modulating G-protein coupled receptor signaling pathway), GO:0007419 (ventral cord development), GO:0007507 (heart development), GO:0008356 (asymmetric cell division), GO:0019722 (calcium-mediated signaling), GO:0019991 (septate juncti…	BE:CBS	FBgn0001122		G protein α o subunit (Gαo) encodes the most abundant G protein in the nervous tissue and is involved in signaling by a variety of GPCRs. It contributes to heart development, axonogenesis, neuro-muscular junction formation, asymmetric cell division, planar cell polarity, blood-brain barrier establishment, Wnt signaling, and gustatory and olfactory sensory perception.
Ugt301D1	protein_coding	UDP-glycosyltransferase family 301 member D1	dme00982 (Drug metabolism - cytochrome P450), dme01100 (Metabolic pathways), dme00860 (Porphyrin metabolism), dme00830 (Retinol metabolism), dme00983 (Drug metabolism - other enzymes), dme00040 (Pentose and glucuronate interconversions), dme00053 (Ascorbate and aldarate metabolism), dme01240 (Biosynthesis of cofactors), dme00980 (Metabolism of xenobiotics by cytochrome P450), GO:0043231 (intracel…	BE:CBS	FBgn0032684		Predicted to enable UDP-glycosyltransferase activity. Predicted to be active in intracellular membrane-bounded organelle. Is expressed in adult head.
CG14400	protein_coding		GO:0008150 (biological_process), GO:0005575 (cellular_component), GO:0003674 (molecular_function)	BE:CBS	FBgn0032896		involved in the biological process
Appl	protein_coding	beta amyloid protein precursor-like	GO:0007422 (peripheral nervous system development), GO:0007611 (learning or memory), GO:0007614 (short-term memory), GO:0007616 (long-term memory), GO:0016319 (mushroom body development), GO:0048678 (response to axon injury), GO:0048812 (neuron projection morphogenesis), GO:0050808 (synapse organization), GO:0051602 (response to electrical stimulus), GO:1901215 (negative regulation of neuron deat…	BE:CBS	FBgn0000108		During development, plays a role in the regulation of the neddylation pathway. Appl and APP-BP1 interact antagonistically during development.
hth	protein_coding	homothorax	dme04391 (Hippo signaling pathway - fly), GO:0001654 (eye development), GO:0001742 (oenocyte differentiation), GO:0001752 (compound eye photoreceptor fate commitment), GO:0006357 (regulation of transcription from RNA polymerase II promoter), GO:0007380 (specification of segmental identity, head), GO:0007383 (specification of segmental identity, antennal segment), GO:0007420 (brain development), G…	BE:CBS	FBgn0001235		homothorax (hth) encodes a homeodomain transcription factor that allows the nuclear import of the protein encoded by exd by direct binding. The complex hth-exd are Hox cofactors but also have additional Hox-independent functions such as in antennal development, proximal appendages patterning, and cell division promotion of the undifferentiated eye field.
cac	protein_coding	cacophony	GO:0002027 (regulation of heart rate), GO:0006816 (calcium ion transport), GO:0006887 (exocytosis), GO:0006914 (autophagy), GO:0007268 (synaptic transmission), GO:0007269 (neurotransmitter secretion), GO:0007602 (phototransduction), GO:0007619 (courtship behavior), GO:0007632 (visual behavior), GO:0008344 (adult locomotory behavior), GO:0010524 (positive regulation of calcium ion transport into c…	BE:CBS	FBgn0263111		cacophony (cac) encodes the primary structural subunit of a voltage-gated calcium channel, which is located at presynaptic active zones. It functions in evoked neurotransmitter release at neuromuscular synapses. It contributes to male courtship behavior and a wide range of neurophysiological processes.
PAN3	protein_coding	Poly(A) specific ribonuclease subunit PAN3	dme03018 (RNA degradation), GO:0000289 (nuclear-transcribed mRNA poly(A) tail shortening), GO:0000290 (deadenylation-dependent decapping of nuclear-transcribed mRNA), GO:0006397 (mRNA processing), GO:0010606 (positive regulation of cytoplasmic mRNA processing body assembly), GO:0000932 (cytoplasmic mRNA processing body), GO:0005737 (cytoplasm), GO:0031251 (PAN complex), GO:0003723 (RNA binding), …	BE:CBS	FBgn0035397		Regulatory subunit of the poly(A)-nuclease (PAN) deadenylation complex, one of two cytoplasmic mRNA deadenylases involved in general and miRNA-mediated mRNA turnover.
CG5390	protein_coding		GO:0006508 (proteolysis), GO:0005576 (extracellular region), GO:0005615 (extracellular space), GO:0004252 (serine-type endopeptidase activity)	BE:CBS	FBgn0032213		Predicted to be involved in proteolysis. Located in extracellular region. Is expressed in adult head; adult heart; amnioserosa; spermatozoon; and yolk nucleus.
Sh	protein_coding	Shaker	GO:0001508 (action potential), GO:0006813 (potassium ion transport), GO:0007611 (learning or memory), GO:0007619 (courtship behavior), GO:0007637 (proboscis extension reflex), GO:0008345 (larval locomotory behavior), GO:0009584 (detection of visible light), GO:0030431 (sleep), GO:0045187 (regulation of circadian sleep/wake cycle, sleep), GO:0045838 (positive regulation of membrane potential), GO:…	BE:CBS	FBgn0003380		Shaker (Sh) encodes the structural alpha subunit of a voltage-gated potassium channel. It plays a key role in maintaining electrical excitability in neurons and muscle cells, as well as regulating neurotransmitter release at the synapse. [Date last reviewed: 2019-03-14]
CG3603	protein_coding		dme01100 (Metabolic pathways), dme00061 (Fatty acid biosynthesis), dme01212 (Fatty acid metabolism), GO:0055114 (oxidation-reduction process), GO:0003857 (3-hydroxyacyl-CoA dehydrogenase activity), GO:0004303 (estradiol 17-beta-dehydrogenase activity), GO:0016616 (oxidoreductase activity, acting on the CH-OH group of donors, NAD or NADP as acceptor)	BE:CBS	FBgn0029648		Predicted to enable estradiol 17-beta-dehydrogenase activity and quinone binding activity. Predicted to be involved in fatty acid biosynthetic process. Is expressed in adult head; adult heart; and organism.
Pka-C1	protein_coding	Protein kinase, cAMP-dependent, catalytic subunit 1	dme04341 (Hedgehog signaling pathway - fly), dme04140 (Autophagy - animal), dme04213 (Longevity regulating pathway - multiple species), dme04310 (Wnt signaling pathway), GO:0006468 (protein phosphorylation), GO:0007165 (signal transduction), GO:0007186 (G-protein coupled receptor signaling pathway), GO:0007314 (oocyte anterior/posterior axis specification), GO:0007317 (regulation of pole plasm os…	BE:CBS	FBgn0000273		Protein kinase, cAMP-dependent, catalytic subunit 1 (Pka-C1) encodes a serine/threonine kinase that contributes to axis specification, rhythmic behavior and synaptic transmission.
CG7900	protein_coding			BE:CBS	FBgn0037548		Predicted to enable acylglycerol lipase activity and fatty acid amide hydrolase activity. Predicted to be involved in fatty acid catabolic process. Is expressed in adult head; embryonic/larval central nervous system; endocrine system component; and eye disc.
mub	protein_coding	mushroom-body expressed	GO:0000381 (regulation of alternative mRNA splicing, via spliceosome), GO:0005634 (nucleus), GO:0003723 (RNA binding), R-DME-72163 (Drosophila melanogaster: mRNA Splicing - Major Pathway), R-DME-72172 (Drosophila melanogaster: mRNA Splicing), R-DME-72203 (Drosophila melanogaster: Processing of Capped Intron-Containing Pre-mRNA), R-DME-8953854 (Drosophila melanogaster: Metabolism of RNA)	BE:CBS	FBgn0262737		mushroom-body expressed (mub) encodes a protein involved in thermosensory behavior and regulation of alternative mRNA splicing
fat-spondin	protein_coding	fat-spondin	GO:0007155 (cell adhesion), GO:0005576 (extracellular region), GO:0031012 (extracellular matrix), GO:0004867 (serine-type endopeptidase inhibitor activity)	BE:CBS	FBgn0026721		Predicted to enable serine-type endopeptidase inhibitor activity. Predicted to be involved in cell adhesion. Located in extracellular region. Is expressed in embryonic/larval fat body; embryonic/larval plasmatocyte; fat body/gonad primordium; plasmatocyte primordium; and yolk nucleus.
sif	protein_coding	still life	GO:0001654 (eye development), GO:0007601 (visual perception), GO:0030036 (actin cytoskeleton organization), GO:0035023 (regulation of Rho protein signal transduction), GO:0043087 (regulation of GTPase activity), GO:0050770 (regulation of axonogenesis), GO:0050803 (regulation of synapse structure and activity), GO:0051491 (positive regulation of filopodium assembly), GO:0045202 (synapse), GO:00306…	BE:CBS	FBgn0085447		encodes a guanine nucleotide exchange factor for Rho family GTPases. It is specifically localized to presynaptic terminals in both the central nervous system and neuromuscular junctions (NMJs), and regulates synaptic growth at NMJs.
Rbp6	protein_coding	RNA-binding protein 6	dme03015 (mRNA surveillance pathway), GO:0048864 (stem cell development), GO:0005634 (nucleus), GO:0005737 (cytoplasm), GO:0005844 (polysome), GO:1990904 (NA), GO:0003723 (RNA binding), GO:0003727 (single-stranded RNA binding), GO:0008266 (poly(U) RNA binding)	BE:CBS	FBgn0260943		RNA-binding protein 6 (Rbp6) encodes a paralog of the RNA-binding protein encoded by msi. The product of Rbp6 may have roles in response to fungal infection and aggressive behavior.
lncRNA:CR43650	ncRNA	long non-coding RNA:CR43650		BE:CBS	FBgn0263659		Is expressed in embryonic/larval central nervous system; embryonic/larval digestive system; embryonic/larval epidermis; embryonic/larval fat body; and eye disc
chrb	protein_coding	charybde	GO:0006915 (apoptotic process), GO:0006979 (response to oxidative stress), GO:0008219 (cell death), GO:0008258 (head involution), GO:0009968 (negative regulation of signal transduction), GO:0032006 (regulation of TOR signaling), GO:0045926 (negative regulation of growth), GO:0005737 (cytoplasm), R-DME-212436 (Drosophila melanogaster: Generic Transcription Pathway), R-DME-3700989 (Drosophila melan…	BE:CBS	FBgn0036165		Inhibits cell growth by regulating the Tor pathway upstream of the Tsc1-Tsc2 complex and downstream of Akt1. Acts as cell death activator during head development.
CG1827	protein_coding		dme04142 (Lysosome), dme00511 (Other glycan degradation), GO:0006517 (protein deglycosylation), GO:0005737 (cytoplasm), GO:0005764 (lysosome), GO:0003948 (N4-(beta-N-acetylglucosaminyl)-L-asparaginase activity), R-DME-168249 (Drosophila melanogaster: Innate Immune System), R-DME-168256 (Drosophila melanogaster: Immune System), R-DME-6798695 (Drosophila melanogaster: Neutrophil degranulation)	BE:CBS	FBgn0033431		Cleaves the GlcNAc-Asn bond which joins oligosaccharides to the peptide of asparagine-linked glycoproteins.
Taldo	protein_coding	Transaldolase	dme01100 (Metabolic pathways), dme01230 (Biosynthesis of amino acids), dme00030 (Pentose phosphate pathway), dme01200 (Carbon metabolism), GO:0005975 (carbohydrate metabolic process), GO:0009052 (pentose-phosphate shunt, non-oxidative branch), GO:0005737 (cytoplasm), GO:0004801 (sedoheptulose-7-phosphate:D-glyceraldehyde-3-phosphate glyceronetransferase activity), R-DME-1430728 (Drosophila melano…	BE:CBS	FBgn0023477		Transaldolase is important for the balance of metabolites in the pentose-phosphate pathway.
scyl	protein_coding	scylla	GO:0006915 (apoptotic process), GO:0006979 (response to oxidative stress), GO:0008219 (cell death), GO:0008258 (head involution), GO:0009968 (negative regulation of signal transduction), GO:0032006 (regulation of TOR signaling), GO:0032504 (multicellular organism reproduction), GO:0045926 (negative regulation of growth), GO:0005737 (cytoplasm), R-DME-212436 (Drosophila melanogaster: Generic Trans…	BE:CBS	FBgn0041094		Inhibits cell growth by regulating the Tor pathway upstream of the Tsc1-Tsc2 complex and downstream of Akt1. Acts as cell death activator during head development.
lncRNA:CR31781	ncRNA	long non-coding RNA:CR31781		BE:CBS	FBgn0051781		Involved in lateral inhibition. Is expressed in embryonic/larval somatic muscle cell.
Elal	protein_coding	Elastin-like	GO:0035094 (response to nicotine), GO:0005575 (cellular_component), GO:0003674 (molecular_function)	BE:CBS	FBgn0013949		Involved in response to nicotine. Is expressed in embryonic/larval fat body.
Jabba	protein_coding	Jabba	GO:0008150 (biological_process), GO:0005811 (lipid particle), GO:0005886 (plasma membrane), GO:0003674 (molecular_function)	BE:CBS	FBgn0259682		Jabba encodes a lipid droplet protein that sequesters histones on lipid droplets. It promotes proper development of pre-cellular embryos, controls levels of nuclear histones, and mediates anti-bacterial protection.
CG32017	protein_coding		GO:0008150 (biological_process), GO:0005575 (cellular_component), GO:0003674 (molecular_function)	BE:CBS	FBgn0052017		Is expressed in adult head.
Osi2	protein_coding	Osiris 2	GO:0008150 (biological_process), GO:0005887 (integral component of plasma membrane), GO:0003674 (molecular_function)	BE:CBS	FBgn0037410		Predicted to be integral component of plasma membrane. Is expressed in embryonic primordium of adult eye; larval foregut atrium; and presumptive embryonic/larval system.
AGO1	protein_coding	Argonaute-1	GO:0006342 (chromatin silencing), GO:0006402 (mRNA catabolic process), GO:0007294 (germarium-derived oocyte fate determination), GO:0007367 (segment polarity determination), GO:0007416 (synapse assembly), GO:0016246 (RNA interference), GO:0017148 (negative regulation of translation), GO:0030422 (production of siRNA involved in RNA interference), GO:0030423 (targeting of mRNA for destruction invol…	BE:CBS	FBgn0262739		Argonaute-1 (AGO1) encodes an Argonaute/Piwi family protein, which interacts with microRNAs to form miRNA-induced silencing complexes (miRISCs). miRISCs are guided to target and repress mRNAs either by transcript destabilisation, translational inhibition, or both. [
CG13793	protein_coding		GO:0006836 (neurotransmitter transport), GO:0005886 (plasma membrane), GO:0016021 (integral component of membrane), GO:0043005 (neuron projection), GO:0005326 (neurotransmitter transporter activity), GO:0005328 (neurotransmitter:sodium symporter activity), GO:0005332 (gamma-aminobutyric acid:sodium symporter activity), GO:0042165 (neurotransmitter binding), R-DME-382551 (Drosophila melanogaster: …	BE:CBS	FBgn0031935		Predicted to enable gamma-aminobutyric acid:sodium symporter activity and neurotransmitter:sodium symporter activity. Predicted to be involved in neurotransmitter transport and sodium ion transmembrane transport. Predicted to be integral component of membrane. Predicted to be active in neuron projection. Predicted to be integral component of plasma membrane. Is expressed in adult abdomen; adult h…
Acer	protein_coding	Angiotensin-converting enzyme-related	GO:0002027 (regulation of heart rate), GO:0003007 (heart morphogenesis), GO:0006508 (proteolysis), GO:0007507 (heart development), GO:0030431 (sleep), GO:0045938 (positive regulation of circadian sleep/wake cycle, sleep), GO:0005576 (extracellular region), GO:0005615 (extracellular space), GO:0005886 (plasma membrane), GO:0004222 (metalloendopeptidase activity), GO:0008237 (metallopeptidase activ…	BE:CBS	FBgn0016122		Angiotensin-converting enzyme-related (Acer) encodes an enzyme with peptidyl-dipeptidase activity that regulates heart rate and circadian sleep/wake cycle.
jim	protein_coding	jim	GO:0031935 (regulation of chromatin silencing), GO:0048813 (dendrite morphogenesis), GO:0003676 (nucleic acid binding)	BE:CBS	FBgn0027339		jim (jim) encodes a zinc finger C2H2 transcription factor involved in dendrite morphogenesis and regulation of chromatin silencing.
Idgf6	protein_coding	Imaginal disc growth factor 6	GO:0005975 (carbohydrate metabolic process), GO:0006036 (cuticle chitin catabolic process), GO:0007444 (imaginal disc development), GO:0018990 (ecdysis, chitin-based cuticle), GO:0040003 (chitin-based cuticle development), GO:0042060 (wound healing), GO:0005576 (extracellular region), GO:0005615 (extracellular space), GO:0004568 (chitinase activity), GO:0008061 (chitin binding), GO:0008084 (imagi…	BE:CBS	FBgn0013763		Imaginal disc growth factor 6 (Idgf6) is one of six genes in the IDGF family, which evolved from chitinases that lost their enzymatic activity. Idgf6 encodes a secreted protein that is highly expressed in larval fat body and adult head. Idgf6 product is involved in molting and egg chamber tube morphogenesis.
TotA	protein_coding	Turandot A	GO:0006979 (response to oxidative stress), GO:0009408 (response to heat), GO:0009409 (response to cold), GO:0009411 (response to UV), GO:0009414 (response to water deprivation), GO:0009612 (response to mechanical stimulus), GO:0009617 (response to bacterium), GO:0034599 (cellular response to oxidative stress), GO:0034605 (cellular response to heat), GO:0034644 (cellular response to UV), GO:004668…	CSE	FBgn0028396		Turandot A (TotA) encodes a protein that belongs to a class of poorly characterized secreted peptides. Some Turandot genes are expressed in response to stress in the fat body by the JAK-STAT
TotC	protein_coding	Turandot C	GO:0006979 (response to oxidative stress), GO:0009408 (response to heat), GO:0009411 (response to UV), GO:0009617 (response to bacterium), GO:0034605 (cellular response to heat), GO:0034644 (cellular response to UV), GO:0005576 (extracellular region), GO:0005615 (extracellular space)	CSE	FBgn0044812		Turandot C (TotC) encodes a protein that belongs to a class of poorly characterized secreted peptides. Some Turandot genes are expressed in response to stress in the fat body by the JAK-STAT pathway.
tobi	protein_coding	target of brain insulin	GO:0005975 (carbohydrate metabolic process)	CSE	FBgn0261575		Predicted to enable hydrolase activity, hydrolyzing O-glycosyl compounds. Predicted to be involved in carbohydrate metabolic process. Is expressed in adult gut; adult head; and fat cell. Human ortholog(s) of this gene implicated in basal ganglia calcification.
Cyp4e3	protein_coding	Cytochrome P450-4e3	GO:0055114 (oxidation-reduction process), GO:0005783 (endoplasmic reticulum), GO:0005506 (iron ion binding), GO:0016705 (oxidoreductase activity, acting on paired donors, with incorporation or reduction of molecular oxygen), GO:0020037 (heme binding), R-DME-1430728 (Drosophila melanogaster: Metabolism), R-DME-193144 (Drosophila melanogaster: Estrogen biosynthesis), R-DME-196071 (Drosophila melano…	CSE	FBgn0015035		Cytochrome P450-4e3 (Cyp4e3) encodes an endoplasmic reticulum protein that plays a role in insecticide tolerance. Upon insecticide feeding Cyp4e3 is significantly up-regulated. Cyp4e3 knockdown in the Malpighian tubule principal cells reduces survival of insecticide-fed flies. Cyp4e3 protein may also regulate hydrogen peroxide levels in the endoplasmic reticulum and its absence triggers JAK/STAT …
CG13658	protein_coding			CSE	FBgn0039315		Its molecular function is unknown
Obp56h	protein_coding	Odorant-binding protein 56h	GO:0007606 (sensory perception of chemical stimulus), GO:0007608 (sensory perception of smell), GO:0007617 (mating behavior), GO:0019236 (response to pheromone), GO:0042048 (olfactory behavior), GO:0071834 (mating pheromone secretion), GO:0005576 (extracellular region), GO:0005549 (odorant binding)	CSE	FBgn0034475		Present in the aqueous fluid surrounding olfactory sensory dendrites and are thought to aid in the capture and transport of hydrophobic odorants into and through this fluid (By similarity). May function in both olfactory and gustatory systems
CG31380	protein_coding			CSE	FBgn0051380		Its molecular function is unknown
CG11892	protein_coding			CSE	FBgn0039313		Is expressed in adult head
CG42825	protein_coding		GO:0055085 (transmembrane transport), GO:0016021 (integral component of membrane), GO:0022857 (transmembrane transporter activity)	CSE	FBgn0262007		Predicted to enable hexose transmembrane transporter activity. Predicted to be involved in hexose transmembrane transport. Predicted to be integral component of membrane. Is expressed in several structures,
CG17571	protein_coding		GO:0006508 (proteolysis), GO:0004252 (serine-type endopeptidase activity), GO:0008236 (serine-type peptidase activity)	CSE	FBgn0259998		Enables serine hydrolase activity. Predicted to be involved in proteolysis. Orthologous to human PRSS36 (serine protease 36) and PRSS53 (serine protease
CG10514	protein_coding			CSE	FBgn0039312		Is expressed in adult head.
MtnE	protein_coding	Metallothionein E	GO:0010043 (response to zinc ion), GO:0010272 (response to silver ion), GO:0046688 (response to copper ion), GO:0046689 (response to mercury ion), GO:0071585 (detoxification of cadmium ion), GO:0005575 (cellular_component), GO:0046872 (metal ion binding)	CSE	FBgn0262146		Metallothionein E (MtnE) encodes one of the five metallothioneins. They are metal-binding polypeptides that coordinate both physiological and xenobiotic metal ions, either for homeostasis or detoxification purposes.
Ag5r	protein_coding	Antigen 5-related	GO:0032504 (multicellular organism reproduction), GO:0005576 (extracellular region), GO:0005615 (extracellular space), GO:0003674 (molecular_function), R-DME-168249 (Drosophila melanogaster: Innate Immune System), R-DME-168256 (Drosophila melanogaster: Immune System), R-DME-6798695 (Drosophila melanogaster: Neutrophil degranulation)	CSE	FBgn0015010		Predicted to be involved in multicellular organism reproduction. Predicted to be located in extracellular region. Predicted to be active in extracellular space
Cyp309a1	protein_coding	Cyp309a1	GO:0055114 (oxidation-reduction process), GO:0005506 (iron ion binding), GO:0016705 (oxidoreductase activity, acting on paired donors, with incorporation or reduction of molecular oxygen), GO:0020037 (heme binding)	CSE	FBgn0031432		May be involved in the metabolism of insect hormones and in the breakdown of synthetic insecticides.
LysP	protein_coding	Lysozyme P	GO:0050829 (defense response to Gram-negative bacterium), GO:0005615 (extracellular space), GO:0003796 (lysozyme activity)	CBS	FBgn0004429		May have a function in the digestion of bacteria in the food
Mthfs	protein_coding	Methenyltetrahydrofolate synthetase	dme01100 (Metabolic pathways), dme00670 (One carbon pool by folate), GO:0009396 (folic acid-containing compound biosynthetic process), GO:0035999 (tetrahydrofolate interconversion), GO:0005739 (mitochondrion), GO:0005829 (cytosol), GO:0030272 (5-formyltetrahydrofolate cyclo-ligase activity), R-DME-1430728 (Drosophila melanogaster: Metabolism), R-DME-196757 (Drosophila melanogaster: Metabolism of …	CBS	FBgn0085453		Is expressed in adult head. Predicted to enable 5-formyltetrahydrofolate cyclo-ligase activity. Predicted to be involved in folic acid-containing compound biosynthetic process and tetrahydrofolate interconversion. Predicted to be active in mitochondrion.
Drsl4	protein_coding	Drosomycin-like 4	dme04624 (Toll and Imd signaling pathway), GO:0050832 (defense response to fungus), GO:0005576 (extracellular region), GO:0003674 (molecular_function)	CBS	FBgn0052282		Drosomycin-like 4 (Drsl4) encodes a secreted peptide with homology to the antifungal peptide encoded by Drs.
Sodh-1	protein_coding	Sorbitol dehydrogenase 1	dme00040 (Pentose and glucuronate interconversions), dme01100 (Metabolic pathways), dme00051 (Fructose and mannose metabolism), GO:0055114 (oxidation-reduction process), GO:0003939 (L-iditol 2-dehydrogenase activity), GO:0008270 (zinc ion binding)	CBS	FBgn0024289		Predicted to enable L-iditol 2-dehydrogenase activity. Predicted to be involved in sorbitol catabolic process. Is expressed in several structures, including adult head; adult heart; ectoderm anlage; extended germ band embryo; and yolk nucleus.
CG34423	protein_coding		GO:0032780 (negative regulation of ATPase activity), GO:0005739 (mitochondrion), GO:0042030 (ATPase inhibitor activity)	CBS	FBgn0085452		Predicted to enable ATPase binding activity and ATPase inhibitor activity. Predicted to be involved in heme biosynthetic process and negative regulation of ATP-dependent activity. Predicted to be active in mitochondrion
CG3700	protein_coding		GO:0006508 (proteolysis), GO:0004252 (serine-type endopeptidase activity)	CBS	FBgn0034796		Predicted to enable serine-type endopeptidase activity. Predicted to be involved in proteolysis. (
SCOT	protein_coding	Succinyl-CoA:3-ketoacid CoA transferase	dme00280 (Valine, leucine and isoleucine degradation), dme01100 (Metabolic pathways), dme00650 (Butanoate metabolism), GO:0046952 (ketone body catabolic process), GO:0005759 (mitochondrial matrix), GO:0008260 (3-oxoacid CoA-transferase activity), R-DME-1430728 (Drosophila melanogaster: Metabolism), R-DME-556833 (Drosophila melanogaster: Metabolism of lipids), R-DME-74182 (Drosophila melanogaster:…	CBS	FBgn0035298		Key enzyme for ketone body catabolism (PubMed:24100554). Transfers the CoA moiety from succinate to acetoacetate
Spat	protein_coding	Serine pyruvate aminotransferase	dme01200 (Carbon metabolism), dme00630 (Glyoxylate and dicarboxylate metabolism), dme01100 (Metabolic pathways), dme00260 (Glycine, serine and threonine metabolism), dme04146 (Peroxisome), dme00250 (Alanine, aspartate and glutamate metabolism), GO:0009436 (glyoxylate catabolic process), GO:0019265 (glycine biosynthetic process, by transamination of glyoxylate), GO:0005777 (peroxisome), GO:0004760…	CBS	FBgn0014031		Alanine-glyoxylate aminotransferase (Agxt) encodes an enzyme involved in glyoxylate catabolism.
mei-P26	protein_coding	meiotic P26	GO:0007276 (gamete generation), GO:0007281 (germ cell development), GO:0007283 (spermatogenesis), GO:0016567 (protein ubiquitination), GO:0051321 (meiotic cell cycle), GO:0005737 (cytoplasm), GO:0004842 (ubiquitin-protein transferase activity), GO:0008270 (zinc ion binding), R-DME-1257604 (Drosophila melanogaster: PIP3 activates AKT signaling), R-DME-162582 (Drosophila melanogaster: Signal Transd…	CBS	FBgn0026206		encodes a protein involved in meiosis, germline differentiation and spermatogenesis
DNaseII	protein_coding	Deoxyribonuclease II	dme04142 (Lysosome), GO:0006308 (DNA catabolic process), GO:0006309 (apoptotic DNA fragmentation), GO:0045476 (nurse cell apoptotic process), GO:0004520 (endodeoxyribonuclease activity), GO:0004531 (deoxyribonuclease II activity), R-DME-199991 (Drosophila melanogaster: Membrane Trafficking), R-DME-199992 (Drosophila melanogaster: trans-Golgi Network Vesicle Budding), R-DME-432720 (Drosophila mela…	CBS	FBgn0000477
Argl	protein_coding	Argininosuccinate lyase	dme01230 (Biosynthesis of amino acids), dme01100 (Metabolic pathways), dme00250 (Alanine, aspartate and glutamate metabolism), dme00220 (Arginine biosynthesis), GO:0042450 (arginine biosynthetic process via ornithine), GO:0005737 (cytoplasm), GO:0004056 (argininosuccinate lyase activity), R-DME-1430728 (Drosophila melanogaster: Metabolism), R-DME-70635 (Drosophila melanogaster: Urea cycle), R-DME…	CBS	FBgn0032076		Predicted to enable argininosuccinate lyase activity.
CG7322	protein_coding		dme01100 (Metabolic pathways), dme00040 (Pentose and glucuronate interconversions), GO:0005997 (xylulose metabolic process), GO:0006006 (glucose metabolic process), GO:0004090 (carbonyl reductase (NADPH) activity), GO:0016655 (oxidoreductase activity, acting on NAD(P)H, quinone or similar compound as acceptor), GO:0050038 (L-xylulose reductase (NADP+) activity), R-DME-1430728 (Drosophila melanoga…	CBS	FBgn0030968		Predicted to enable L-xylulose reductase (NADP+) activity and carbonyl reductase (NADPH) activity. Predicted to be involved in glucose metabolic process and xylulose metabolic process. Is expressed in adult head; adult heart; embryonic/larval fat body; and organism.
CG5397	protein_coding		GO:0008150 (biological_process), GO:0005615 (extracellular space), GO:0052689 (carboxylic ester hydrolase activity), R-DME-1430728 (Drosophila melanogaster: Metabolism), R-DME-174824 (Drosophila melanogaster: Plasma lipoprotein assembly, remodeling, and clearance), R-DME-211859 (Drosophila melanogaster: Biological oxidations), R-DME-211945 (Drosophila melanogaster: Phase I - Functionalization of …	CBS	FBgn0031327		Is expressed in adult head; embryonic/larval plasmatocyte; and embryonic/larval tracheal dorsal trunk.
CG9886	protein_coding		dme00030 (Pentose phosphate pathway), dme01200 (Carbon metabolism), dme01100 (Metabolic pathways), dme00630 (Glyoxylate and dicarboxylate metabolism), dme00561 (Glycerolipid metabolism), dme00260 (Glycine, serine and threonine metabolism), GO:0006468 (protein phosphorylation), GO:0005737 (cytoplasm), GO:0008887 (glycerate kinase activity), R-DME-1430728 (Drosophila melanogaster: Metabolism), R-DM…	CBS	FBgn0031428		Predicted to enable glycerate kinase activity. Predicted to be involved in protein phosphorylation.
CG31548	protein_coding		GO:0004303 (estradiol 17-beta-dehydrogenase activity), GO:0047045 (testosterone 17-beta-dehydrogenase (NADP+) activity)	CBS	FBgn0051548		Predicted to enable estradiol 17-beta-dehydrogenase activity and testosterone 17-beta-dehydrogenase (NADP+) activity. Is expressed in adult head and adult heart.
CG30371	protein_coding		GO:0006508 (proteolysis), GO:0004252 (serine-type endopeptidase activity)	CBS	FBgn0050371		Predicted to enable serine-type endopeptidase activity. Predicted to be involved in proteolysis.
CG10672	protein_coding		dme01100 (Metabolic pathways), dme04146 (Peroxisome), dme00830 (Retinol metabolism), GO:0005777 (peroxisome), GO:0000253 (3-keto sterol reductase activity), GO:0004090 (carbonyl reductase (NADPH) activity), GO:0016655 (oxidoreductase activity, acting on NAD(P)H, quinone or similar compound as acceptor), R-DME-162582 (Drosophila melanogaster: Signal Transduction), R-DME-5362517 (Drosophila melanog…	CBS	FBgn0035588		Predicted to enable 3-keto sterol reductase activity and carbonyl reductase (NADPH) activity. Predicted to be located in peroxisome. Is expressed in adult head; adult heart; embryonic midgut chamber; embryonic/larval midgut; and organism
loj	protein_coding	logjam	GO:0006886 (intracellular protein transport), GO:0006888 (ER to Golgi vesicle-mediated transport), GO:0007030 (Golgi organization), GO:0018991 (oviposition), GO:0048042 (regulation of post-mating oviposition), GO:0048193 (Golgi vesicle transport), GO:0005783 (endoplasmic reticulum), GO:0005793 (endoplasmic reticulum-Golgi intermediate compartment), GO:0005794 (Golgi apparatus), GO:0005801 (cis-Go…	CBS	FBgn0061492		logjam (loj) encodes a p24-transporter-type protein involved in oviposition
DhpD	protein_coding	Dihydropterin deaminase	dme00230 (Purine metabolism), dme01232 (Nucleotide metabolism), dme01100 (Metabolic pathways), GO:0006147 (guanine catabolic process), GO:0006726 (eye pigment biosynthetic process), GO:0046098 (guanine metabolic process), GO:0051067 (dihydropteridine metabolic process), GO:0004153 (dihydropterin deaminase activity), GO:0008270 (zinc ion binding), GO:0008892 (guanine deaminase activity), R-DME-143…	CBS	FBgn0261436		Catalyzes the hydrolytic deamination of guanine, producing xanthine and ammonia. Also has 7,8-dihydropterin deaminase activity, which plays a role in synthesis of the red eye pigment aurodrosopterin.
fne	protein_coding	found in neurons	GO:0008049 (male courtship behavior), GO:0050684 (regulation of mRNA processing), GO:0051252 (regulation of RNA metabolic process), GO:0005737 (cytoplasm), GO:0003729 (mRNA binding), GO:0008266 (poly(U) RNA binding), R-DME-450520 (Drosophila melanogaster: HuR (ELAVL1) binds and stabilizes mRNA), R-DME-450531 (Drosophila melanogaster: Regulation of mRNA stability by proteins that bind AU-rich elem…	CBS	FBgn0086675		found in neurons (fne) encodes an RNA binding protein that works as a post-transcriptional regulator. It is present in the cytoplasm of all neurons. Lack of fne produces fusion of the mushroom body β-lobes and altered male courtship behaviour.
NimB4	protein_coding	Nimrod B4	GO:0042742 (defense response to bacterium), GO:0005576 (extracellular region), GO:0003674 (molecular_function)	CBS	FBgn0028542		Predicted to be located in extracellular region.
Nepl19	protein_coding	Neprilysin-like 19	GO:0006508 (proteolysis), GO:0004222 (metalloendopeptidase activity), R-DME-168249 (Drosophila melanogaster: Innate Immune System), R-DME-168256 (Drosophila melanogaster: Immune System), R-DME-2022377 (Drosophila melanogaster: Metabolism of Angiotensinogen to Angiotensins), R-DME-2980736 (Drosophila melanogaster: Peptide hormone metabolism), R-DME-392499 (Drosophila melanogaster: Metabolism of pr…	CBS	FBgn0039612		Predicted to be involved in protein processing. Predicted to be active in plasma membrane. Is expressed in adult head.
UK114	protein_coding	UK114	GO:0006457 (protein folding), GO:1901565 (organonitrogen compound catabolic process), GO:0005739 (mitochondrion), GO:0005829 (cytosol), GO:0019239 (deaminase activity), R-DME-1430728 (Drosophila melanogaster: Metabolism), R-DME-71291 (Drosophila melanogaster: Metabolism of amino acids and derivatives), R-DME-8849175 (Drosophila melanogaster: Threonine catabolism)	CBS	FBgn0086691		Molecular chaperone. Seems to fulfill an ATP-independent, HSP70-like function in protein folding. May protect essential factors of cell proliferation during heat shock. No role in calpain activation.
Hrb27C	protein_coding	Heterogeneous nuclear ribonucleoprotein at 27C	dme03015 (mRNA surveillance pathway), GO:0007283 (spermatogenesis), GO:0007319 (negative regulation of oskar mRNA translation), GO:0007411 (axon guidance), GO:0045451 (pole plasm oskar mRNA localization), GO:0045727 (positive regulation of translation), GO:0048024 (regulation of mRNA splicing, via spliceosome), GO:0048026 (positive regulation of mRNA splicing, via spliceosome), GO:1903688 (NA), G…	CBS	FBgn0004838		This protein is a component of ribonucleosomes. Could be needed to organize a concentration gradient of a dorsalizing morphogen (Dm) originating in the germinal vesicle.
GstE11	protein_coding	Glutathione S transferase E11	dme00480 (Glutathione metabolism), dme00983 (Drug metabolism - other enzymes), dme00982 (Drug metabolism - cytochrome P450), dme01100 (Metabolic pathways), dme00980 (Metabolism of xenobiotics by cytochrome P450), GO:0006749 (glutathione metabolic process), GO:0005737 (cytoplasm), GO:0004364 (glutathione transferase activity)	CBS	FBgn0034354		Enables glutathione transferase activity. Involved in glutathione metabolic process. Predicted to be located in cytoplasm. Is expressed in adult head; embryonic/larval muscle system; organism; and trunk mesoderm.
SPE	protein_coding	Spatzle-Processing Enzyme	dme04624 (Toll and Imd signaling pathway), GO:0002225 (positive regulation of antimicrobial peptide production), GO:0002804 (positive regulation of antifungal peptide production), GO:0006508 (proteolysis), GO:0006965 (positive regulation of biosynthetic process of antibacterial peptides active against Gram-positive bacteria), GO:0008592 (regulation of Toll signaling pathway), GO:0009620 (response…	CBS	FBgn0039102		Encodes a secreted serine protease that participates in the cleavage of the Toll ligand encoded by spz during the immune response, leading to Toll pathway activation in the fat body and haemocytes.
CG3246	protein_coding		GO:0008289 (lipid binding)	CBS	FBgn0031538		Predicted to enable lipid binding activity. Is expressed in adult head; amnioserosa; embryonic/larval fat body; organism; and yolk nucleus
CG14823	protein_coding		GO:0003796 (lysozyme activity)	CBS	FBgn0035734		Predicted to enable lysozyme activity.
CG3397	protein_coding		GO:0055114 (oxidation-reduction process), GO:0005829 (cytosol), GO:0016491 (oxidoreductase activity)	CBS	FBgn0037975		Predicted to be involved in dehydro-D-arabinono-1,4-lactone biosynthetic process.
Hf	protein_coding	Helical Factor	GO:0045087 (innate immune response)	CBS	FBgn0014000		Involved in innate immune response.
Pgm1	protein_coding	Phosphoglucose mutase 1	dme01250 (Biosynthesis of nucleotide sugars), dme00010 (Glycolysis / Gluconeogenesis), dme00500 (Starch and sucrose metabolism), dme00230 (Purine metabolism), dme01100 (Metabolic pathways), dme00030 (Pentose phosphate pathway), dme00052 (Galactose metabolism), dme00520 (Amino sugar and nucleotide sugar metabolism), GO:0005978 (glycogen biosynthetic process), GO:0006006 (glucose metabolic process)…	CBS	FBgn0003076		his enzyme participates in both the breakdown and synthesis of glucose.
CG32647	protein_coding		GO:0008150 (biological_process), GO:0005575 (cellular_component), GO:0003674 (molecular_function)	CBS	FBgn0052647		Predicted to be active in membrane.
CG33993	protein_coding		GO:0008150 (biological_process), GO:0005575 (cellular_component), GO:0003674 (molecular_function)	CBS	FBgn0053993		Enables receptor tyrosine kinase binding activity. Involved in negative regulation of epidermal growth factor receptor signaling pathway.
CG31937	protein_coding			CBS	FBgn0031360		Is expressed in several structures, including anterior endoderm anlage; embryonic/larval midgut; embryonic/larval midgut primordium; embryonic/larval visceral muscle cell; and germ layer.
Unr	protein_coding	Upstream of N-ras	GO:0007549 (dosage compensation), GO:0009047 (dosage compensation by hyperactivation of X chromosome), GO:0017148 (negative regulation of translation), GO:0042714 (dosage compensation complex assembly), GO:0005737 (cytoplasm), GO:0003730 (mRNA 3'-UTR binding), GO:0005515 (protein binding)	CBS	FBgn0263352		Encodes an RNA binding protein that functions as an RNA chaperone and translation regulator. It performs opposing, sex-specific, roles in X-chromosome dosage compensation by regulating lncRNA:roX2 RNA conformation in males and msl-2 mRNA translation in females.
CG43402	protein_coding		GO:0008150 (biological_process), GO:0005575 (cellular_component), GO:0003674 (molecular_function)	CBS	FBgn0263321		Is expressed in adult head.
CG15213	protein_coding			CBS	FBgn0040843		Its molecular function is unknown
Cpr49Af	protein_coding	Cuticular protein 49Af	GO:0040003 (chitin-based cuticle development), GO:0031012 (extracellular matrix), GO:0008010 (structural constituent of chitin-based larval cuticle), GO:0042302 (structural constituent of cuticle)	CBS	FBgn0033729		Predicted to be a structural constituent of chitin-based larval cuticle
Cyp4d1	protein_coding	Cytochrome P450-4d1	GO:0055114 (oxidation-reduction process), GO:0005506 (iron ion binding), GO:0016705 (oxidoreductase activity, acting on paired donors, with incorporation or reduction of molecular oxygen), GO:0020037 (heme binding), R-DME-1430728 (Drosophila melanogaster: Metabolism), R-DME-193144 (Drosophila melanogaster: Estrogen biosynthesis), R-DME-196071 (Drosophila melanogaster: Metabolism of steroid hormon…	CBS	FBgn0005670		Involved in the metabolism of insect hormones and in the breakdown of synthetic insecticides.
CG3999	protein_coding		dme01100 (Metabolic pathways), dme01200 (Carbon metabolism), dme00630 (Glyoxylate and dicarboxylate metabolism), dme00260 (Glycine, serine and threonine metabolism), GO:0019464 (glycine decarboxylation via glycine cleavage system), GO:0055114 (oxidation-reduction process), GO:0005739 (mitochondrion), GO:0005960 (glycine cleavage complex), GO:0004375 (glycine dehydrogenase (decarboxylating) activi…	CBS	FBgn0037801		Predicted to be involved in glycine decarboxylation via glycine cleavage system. Predicted to be active in mitochondrion. Is expressed in adult head; adult heart; embryonic/larval fat body; fat body/gonad primordium; and yolk nucleus.
CG5171	protein_coding		dme01100 (Metabolic pathways), dme00500 (Starch and sucrose metabolism), GO:0005992 (trehalose biosynthetic process), GO:0004805 (trehalose-phosphatase activity)	CBS	FBgn0031907		Enables trehalose-phosphatase activity. Predicted to be involved in trehalose biosynthetic process. Is expressed in adult head; adult midgut progenitor cell; amnioserosa; embryonic/larval midgut; and yolk nucleus.
CG7560	protein_coding		dme01100 (Metabolic pathways), dme00670 (One carbon pool by folate), GO:0006730 (one-carbon metabolic process), GO:0009086 (methionine biosynthetic process), GO:0035999 (tetrahydrofolate interconversion), GO:0055114 (oxidation-reduction process), GO:0005829 (cytosol), GO:0004489 (methylenetetrahydrofolate reductase (NAD(P)H) activity), GO:0071949 (FAD binding), R-DME-1430728 (Drosophila melanogas…	CBS	FBgn0036157		Predicted to enable FAD binding activity and methylenetetrahydrofolate reductase (NAD(P)H) activity. Predicted to be involved in methionine biosynthetic process and tetrahydrofolate interconversion.
Sodh-2	protein_coding	Sorbitol dehydrogenase-2	dme00051 (Fructose and mannose metabolism), dme01100 (Metabolic pathways), dme00040 (Pentose and glucuronate interconversions), GO:0055114 (oxidation-reduction process), GO:0003939 (L-iditol 2-dehydrogenase activity), GO:0008270 (zinc ion binding), R-DME-1430728 (Drosophila melanogaster: Metabolism), R-DME-5652084 (Drosophila melanogaster: Fructose metabolism), R-DME-5652227 (Drosophila melanogas…	CBS	FBgn0022359		Enables L-iditol 2-dehydrogenase activity. Involved in sorbitol catabolic process. Is expressed in adult head; amnioserosa; embryonic/larval midgut; organism
Cyp6a13	protein_coding	Cyp6a13	GO:0042742 (defense response to bacterium), GO:0055114 (oxidation-reduction process), GO:0005506 (iron ion binding), GO:0016705 (oxidoreductase activity, acting on paired donors, with incorporation or reduction of molecular oxygen), GO:0020037 (heme binding)	CBS	FBgn0033304		May be involved in the metabolism of insect hormones and in the breakdown of synthetic insecticides.
Gip	protein_coding	GIP-like	dme01100 (Metabolic pathways), dme00630 (Glyoxylate and dicarboxylate metabolism), GO:0046487 (glyoxylate metabolic process), GO:0005576 (extracellular region), GO:0008903 (hydroxypyruvate isomerase activity), GO:0016857 (racemase and epimerase activity, acting on carbohydrates and derivatives)	CBS	FBgn0011770		Catalyzes the reversible isomerization between hydroxypyruvate and 2-hydroxy-3-oxopropanoate
CG31955	protein_coding		GO:0005575 (cellular_component), GO:0003674 (molecular_function)	CBS	FBgn0051955		Its molecular function is unknown
CG6415	protein_coding		dme00630 (Glyoxylate and dicarboxylate metabolism), dme01100 (Metabolic pathways), dme00670 (One carbon pool by folate), dme00260 (Glycine, serine and threonine metabolism), dme01200 (Carbon metabolism), GO:0006546 (glycine catabolic process), GO:0019464 (glycine decarboxylation via glycine cleavage system), GO:0005739 (mitochondrion), GO:0005960 (glycine cleavage complex), GO:0004047 (aminomethy…	CBS	FBgn0032287		Predicted to enable aminomethyltransferase activity. Predicted to be involved in glycine decarboxylation via glycine cleavage system. Predicted to be active in mitochondrion. Is expressed in adult head; adult heart; embryonic/larval fat body; fat body primordium; and fat body/gonad primordium.
mamo	protein_coding	maternal gene required for meiosis	GO:0006357 (regulation of transcription from RNA polymerase II promoter), GO:0007143 (female meiotic division), GO:0007276 (gamete generation), GO:0035041 (sperm chromatin decondensation), GO:1902275 (regulation of chromatin organization), GO:0000228 (nuclear chromosome), GO:0005634 (nucleus), GO:0005737 (cytoplasm), GO:0003682 (chromatin binding), GO:0043565 (sequence-specific DNA binding)	CBS	FBgn0267033		encodes a zinc finger C2H2 transcription factor enric
CG10932	protein_coding		dme00650 (Butanoate metabolism), dme01212 (Fatty acid metabolism), dme00620 (Pyruvate metabolism), dme00380 (Tryptophan metabolism), dme01200 (Carbon metabolism), dme00310 (Lysine degradation), dme00071 (Fatty acid degradation), dme00630 (Glyoxylate and dicarboxylate metabolism), dme01100 (Metabolic pathways), dme00280 (Valine, leucine and isoleucine degradation), dme00900 (Terpenoid backbone bio…	CBS	FBgn0029969		Predicted to enable acetyl-CoA C-acetyltransferase activity. Predicted to be involved in acetyl-CoA biosynthetic process and fatty acid beta-oxidation. Located in mitochondrion. Is expressed in adult head; adult heart; embryonic/larval midgut; and organism.
alpha-Est7	protein_coding	alpha-Esterase-7	GO:0008340 (determination of adult lifespan), GO:0019915 (lipid storage), GO:0046683 (response to organophosphorus), GO:0052689 (carboxylic ester hydrolase activity)	CBS	FBgn0015575		Encodes a carboxylic ester hydrolase involved in insecticide tolerance, lipid metabolism and lifespan control.
Mnt	protein_coding	Mnt	GO:0000122 (negative regulation of transcription from RNA polymerase II promoter), GO:0006355 (regulation of transcription, DNA-templated), GO:0030308 (negative regulation of cell growth), GO:0051726 (regulation of cell cycle), GO:0005634 (nucleus), GO:0005654 (nucleoplasm), GO:0003700 (sequence-specific DNA binding transcription factor activity), GO:0005515 (protein binding), GO:0043565 (sequenc…	CBS	FBgn0023215		Encodes a protein that belongs to the basic-helic-loop-helix-zipper class of transcription factors, which form heterodimers with the protein encoded by Max. Mnt product acts as a repressor of transcription by recruiting a co-repressor complex to its genomic binding sites. It antagonizes cell growth promoting functions of the product encoded by Myc and its depletion produces flies with larger cell…
Marc	protein_coding	Mitochondrial amidoxime reducing component	GO:0008940 (nitrate reductase activity), GO:0030151 (molybdenum ion binding), GO:0030170 (pyridoxal phosphate binding), R-DME-1430728 (Drosophila melanogaster: Metabolism), R-DME-211859 (Drosophila melanogaster: Biological oxidations), R-DME-211945 (Drosophila melanogaster: Phase I - Functionalization of compounds)	CBS	FBgn0033451		Mitochondrial amidoxime reducing component (Marc) encodes a protein predicted to be a molybdenum cofactor enzyme. mARC enzymes are believed to be moonlighting enzymes, with two independent reductase functions:
CG32335	protein_coding		GO:0008150 (biological_process), GO:0005575 (cellular_component), GO:0005634 (nucleus), GO:0008270 (zinc ion binding), GO:0016788 (hydrolase activity, acting on ester bonds)	CBS	FBgn0063667		Enables hydrolase activity, acting on ester bonds. Involved in cellular response to glucose stimulus and positive regulation of insulin receptor signaling pathway. Predicted to be active in nucleus
NimB5	protein_coding	Nimrod B5	GO:0042742 (defense response to bacterium), GO:0005576 (extracellular region), GO:0003674 (molecular_function)	CBS	FBgn0028936		Predicted to be located in extracellular region.
CG4587	protein_coding		GO:0005891 (voltage-gated calcium channel complex), GO:0005245 (voltage-gated calcium channel activity), R-DME-1430728 (Drosophila melanogaster: Metabolism), R-DME-163685 (Drosophila melanogaster: Integration of energy metabolism), R-DME-397014 (Drosophila melanogaster: Muscle contraction), R-DME-422356 (Drosophila melanogaster: Regulation of insulin secretion), R-DME-5576891 (Drosophila melanoga…	CBS	FBgn0028863		Involved in positive regulation of voltage-gated calcium channel activity. Predicted to be part of voltage-gated calcium channel complex. Is expressed in adult head and spermatozoon.
Spn42Dd	protein_coding	Serpin 42Dd	GO:0002785 (negative regulation of antimicrobial peptide production), GO:0010951 (negative regulation of endopeptidase activity), GO:0032504 (multicellular organism reproduction), GO:0045751 (negative regulation of Toll signaling pathway), GO:0045861 (negative regulation of proteolysis), GO:1905035 (NA), GO:0005615 (extracellular space), GO:0004867 (serine-type endopeptidase inhibitor activity), …	CBS	FBgn0028988		Serine protease inhibitor with activity toward trypsin. Involved in innate immunity to fungal infection by negatively regulating the Toll signaling pathway and suppressing the expression of the antifungal peptide drosomycin.
CG9547	protein_coding		dme00310 (Lysine degradation), dme00380 (Tryptophan metabolism), dme00071 (Fatty acid degradation), dme01100 (Metabolic pathways), GO:0006554 (lysine catabolic process), GO:0006568 (tryptophan metabolic process), GO:0046948 (hydroxylysine catabolic process), GO:0055114 (oxidation-reduction process), GO:0005739 (mitochondrion), GO:0005759 (mitochondrial matrix), GO:0004361 (glutaryl-CoA dehydrogen…	CBS	FBgn0031824		Predicted to be involved in fatty acid beta-oxidation using acyl-CoA dehydrogenase and fatty-acyl-CoA biosynthetic process. Predicted to be located in mitochondrion. Is expressed in adult head and adult heart.
CG4306	protein_coding		GO:0005576 (extracellular region), GO:0003839 (gamma-glutamylcyclotransferase activity)	CBS	FBgn0036787		Predicted to enable gamma-glutamylcyclotransferase activity. Located in extracellular region. Is expressed in eye and yolk nucleus.
Nckx30C	protein_coding	Nckx30C	GO:0006814 (sodium ion transport), GO:0006816 (calcium ion transport), GO:0006874 (cellular calcium ion homeostasis), GO:0048749 (compound eye development), GO:0070588 (calcium ion transmembrane transport), GO:0005887 (integral component of plasma membrane), GO:0016021 (integral component of membrane), GO:0005262 (calcium channel activity), GO:0008273 (calcium, potassium:sodium antiporter activit…	CBS	FBgn0028704		May function in the removal and maintenance of calcium homeostasis during signaling in the adult and in signaling events during embryogenesis and patterning of imaginal disks.
CG13085	protein_coding		GO:0031146 (SCF-dependent proteasomal ubiquitin-dependent protein catabolic process), GO:0019005 (SCF ubiquitin ligase complex), GO:0004842 (ubiquitin-protein transferase activity)	CBS	FBgn0032780		Predicted to be involved in SCF-dependent proteasomal ubiquitin-dependent protein catabolic process.
CG43071	protein_coding		GO:0008150 (biological_process), GO:0005575 (cellular_component), GO:0003674 (molecular_function)	CBS	FBgn0262481		Its molecular function is unknown
CG7509	protein_coding		GO:0005615 (extracellular space), GO:0031012 (extracellular matrix), R-DME-112316 (Drosophila melanogaster: Neuronal System), R-DME-162582 (Drosophila melanogaster: Signal Transduction), R-DME-193634 (Drosophila melanogaster: Axonal growth inhibition (RHOA activation)), R-DME-193697 (Drosophila melanogaster: p75NTR regulates axonogenesis), R-DME-193704 (Drosophila melanogaster: p75 NTR receptor-m…	CBS	FBgn0035575		Predicted to be active in extracellular matrix and extracellular space.
Pkc98E	protein_coding	Protein C kinase 98E	GO:0006468 (protein phosphorylation), GO:0007030 (Golgi organization), GO:0007616 (long-term memory), GO:0008285 (negative regulation of cell proliferation), GO:0009950 (dorsal/ventral axis specification), GO:0018105 (peptidyl-serine phosphorylation), GO:0034389 (lipid particle organization), GO:0035556 (intracellular signal transduction), GO:0045471 (response to ethanol), GO:0005886 (plasma memb…	CBS	FBgn0003093		Protein C kinase 98E (Pkc98E) encodes a serine-threonine protein kinase activated by calcium, membrane translocation and lipids
msi	protein_coding	musashi	dme03015 (mRNA surveillance pathway), GO:0001709 (cell fate determination), GO:0001752 (compound eye photoreceptor fate commitment), GO:0006417 (regulation of translation), GO:0010629 (negative regulation of gene expression), GO:0017148 (negative regulation of translation), GO:0019827 (stem cell maintenance), GO:0022416 (chaeta development), GO:0042078 (germ-line stem cell division), GO:0071456 (…	CBS	FBgn0011666		It contributes to cell fate determination, as well as cellular response to normoxic/hypoxic conditions.
Hex-C	protein_coding	Hexokinase C	dme00051 (Fructose and mannose metabolism), dme01200 (Carbon metabolism), dme00500 (Starch and sucrose metabolism), dme00010 (Glycolysis / Gluconeogenesis), dme01250 (Biosynthesis of nucleotide sugars), dme01100 (Metabolic pathways), dme00520 (Amino sugar and nucleotide sugar metabolism), dme00052 (Galactose metabolism), GO:0001678 (cellular glucose homeostasis), GO:0006096 (glycolytic process), …	CBS	FBgn0001187		Encodes a hexokinase involved in glucose homeostasis.
CG7470	protein_coding		dme01230 (Biosynthesis of amino acids), dme01100 (Metabolic pathways), dme00330 (Arginine and proline metabolism), GO:0006561 (proline biosynthetic process), GO:0055114 (oxidation-reduction process), GO:0005739 (mitochondrion), GO:0005743 (mitochondrial inner membrane), GO:0004349 (glutamate 5-kinase activity), GO:0004350 (glutamate-5-semialdehyde dehydrogenase activity), GO:0017084 (delta1-pyrro…	CBS	FBgn0037146		Predicted to enable glutamate-5-semialdehyde dehydrogenase activity. Predicted to be involved in proline biosynthetic process. Predicted to be active in mitochondrion. Is expressed in adult head; adult heart; embryonic/larval fat body; embryonic/larval midgut; and yolk nucleus.
CG31221	protein_coding			CBS	FBgn0051221		Is expressed in adult head; embryonic/larval fat body; embryonic/larval midgut primordium; embryonic/larval nervous system; and trunk mesoderm.
CG4210	protein_coding		GO:0008080 (N-acetyltransferase activity), R-DME-1430728 (Drosophila melanogaster: Metabolism), R-DME-351200 (Drosophila melanogaster: Interconversion of polyamines), R-DME-351202 (Drosophila melanogaster: Metabolism of polyamines), R-DME-71291 (Drosophila melanogaster: Metabolism of amino acids and derivatives)	CBS	FBgn0038302		Predicted to enable N-acetyltransferase activity.
Nep6	protein_coding	Neprilysin 6	GO:0006508 (proteolysis), GO:0004222 (metalloendopeptidase activity), R-DME-168249 (Drosophila melanogaster: Innate Immune System), R-DME-168256 (Drosophila melanogaster: Immune System), R-DME-2022377 (Drosophila melanogaster: Metabolism of Angiotensinogen to Angiotensins), R-DME-2980736 (Drosophila melanogaster: Peptide hormone metabolism), R-DME-392499 (Drosophila melanogaster: Metabolism of pr…	CBS	FBgn0030425		Predicted to be involved in protein processing. Predicted to be active in plasma membrane. Is expressed in adult head.
CG10184	protein_coding		dme01100 (Metabolic pathways), dme01230 (Biosynthesis of amino acids), dme00260 (Glycine, serine and threonine metabolism), GO:0006545 (glycine biosynthetic process), GO:0006567 (threonine catabolic process), GO:0005829 (cytosol), GO:0008732 (L-allo-threonine aldolase activity)	CBS	FBgn0039094		Predicted to enable L-allo-threonine aldolase activity. Predicted to be involved in glycine biosynthetic process and threonine catabolic process.
Prpk	protein_coding	p53-related protein kinase	GO:0006468 (protein phosphorylation), GO:0030307 (positive regulation of cell growth), GO:0032008 (positive regulation of TOR signaling), GO:0040018 (positive regulation of multicellular organism growth), GO:0070525 (threonylcarbamoyladenosine metabolic process), GO:0000408 (EKC/KEOPS complex), GO:0005634 (nucleus), GO:0005737 (cytoplasm), GO:0005829 (cytosol), GO:0004674 (protein serine/threonin…	CBS	FBgn0035590		encodes an atypical Ser/Thr kinase part of the KEOPS/EKC complex. It phosphorylates the product of p53 and is regulated by the products of Akt and Rab35. It is involved in tRNAs modification, telomere and chromatin dynamics.
CG3699	protein_coding		GO:0006635 (fatty acid beta-oxidation), GO:0004303 (estradiol 17-beta-dehydrogenase activity), GO:0008670 (2,4-dienoyl-CoA reductase (NADPH) activity), GO:0047045 (testosterone 17-beta-dehydrogenase (NADP+) activity)	CBS	FBgn0040349		Predicted to enable estradiol 17-beta-dehydrogenase activity and testosterone 17-beta-dehydrogenase (NADP+) activity. Is expressed in adult head; adult heart; embryonic Malpighian tubule; extended germ band embryo
v	protein_coding	vermilion	dme01240 (Biosynthesis of cofactors), dme01100 (Metabolic pathways), dme00380 (Tryptophan metabolism), GO:0006569 (tryptophan catabolic process), GO:0006727 (ommochrome biosynthetic process), GO:0019441 (tryptophan catabolic process to kynurenine), GO:0019442 (tryptophan catabolic process to acetyl-CoA), GO:0048072 (compound eye pigmentation), GO:0051289 (protein homotetramerization), GO:0070189 …	CBS	FBgn0003965		Heme-dependent dioxygenase that catalyzes the oxidative cleavage of the L-tryptophan (L-Trp) pyrrole ring and converts L-tryptophan to N-formyl-L-kynurenine. Required during larval growth to control the level of potentially harmful free tryptophan in the hemolymph. In the adult the same reaction is the first step in the ommochrome biosynthetic pathway
CG43114	protein_coding		GO:0008150 (biological_process), GO:0005575 (cellular_component), GO:0003674 (molecular_function)	CBS	FBgn0262574		Its molecular function is unknown
tun	protein_coding	tungus	GO:0006464 (cellular protein modification process), GO:0005634 (nucleus), GO:0005829 (cytosol), GO:0008418 (protein-N-terminal asparagine amidohydrolase activity), GO:0070773 (protein-N-terminal glutamine amidohydrolase activity)	CBS	FBgn0034046		Mediates the side-chain deamidation of N-terminal glutamine residues to glutamate, an important step in N-end rule pathway of protein degradation.
CG4592	protein_coding		dme00071 (Fatty acid degradation), GO:0006635 (fatty acid beta-oxidation), GO:0005739 (mitochondrion), GO:0004165 (dodecenoyl-CoA delta-isomerase activity), GO:0004300 (enoyl-CoA hydratase activity)	CBS	FBgn0032162		Predicted to be involved in fatty acid beta-oxidation. Predicted to be active in mitochondrion. Is expressed in adult head.
CG6287	protein_coding		dme01200 (Carbon metabolism), dme00270 (Cysteine and methionine metabolism), dme01230 (Biosynthesis of amino acids), dme01100 (Metabolic pathways), dme00260 (Glycine, serine and threonine metabolism), GO:0006520 (cellular amino acid metabolic process), GO:0055114 (oxidation-reduction process), GO:0004617 (phosphoglycerate dehydrogenase activity), GO:0051287 (NAD binding), R-DME-1430728 (Drosophil…	CBS	FBgn0032350		Predicted to enable phosphoglycerate dehydrogenase activity. Is expressed in adult head; adult heart; and organism.
Cyp9h1	protein_coding	Cyp9h1	GO:0055114 (oxidation-reduction process), GO:0005506 (iron ion binding), GO:0016705 (oxidoreductase activity, acting on paired donors, with incorporation or reduction of molecular oxygen), GO:0020037 (heme binding)	CBS	FBgn0033775		May be involved in the metabolism of insect hormones and in the breakdown of synthetic insecticides.
Sxl	protein_coding	Sex lethal	GO:0000381 (regulation of alternative mRNA splicing, via spliceosome), GO:0007131 (reciprocal meiotic recombination), GO:0007446 (imaginal disc growth), GO:0007530 (sex determination), GO:0007541 (sex determination, primary response to X:A ratio), GO:0007548 (sex differentiation), GO:0007549 (dosage compensation), GO:0009994 (oocyte differentiation), GO:0017148 (negative regulation of translation…	CBS	FBgn0264270		Encodes an RNA-binding protein, member of the RNA recognition motif (RRM) family. It is a master-feminizing switch contributing to all aspects of sexual dimorphism.
CG43778	protein_coding		GO:0008150 (biological_process), GO:0016020 (membrane), GO:0003674 (molecular_function)	CBS	FBgn0264308		Involved in regulation of sensory perception. Predicted to be active in membrane. Is expressed in adult head.
ths	protein_coding	thisbe	GO:0001710 (mesodermal cell fate commitment), GO:0007272 (ensheathment of neurons), GO:0007498 (mesoderm development), GO:0007501 (mesodermal cell fate specification), GO:0007523 (larval visceral muscle development), GO:0007526 (larval somatic muscle development), GO:0008078 (mesodermal cell migration), GO:0008543 (fibroblast growth factor receptor signaling pathway), GO:0010001 (glial cell diffe…	CBS	FBgn0033652		Its roles include acting as a chemoattractant in directional cell migration, and regulating adhesion, differentiation, and cell survival.
CG10516	protein_coding		GO:0006511 (ubiquitin-dependent protein catabolic process), GO:0043161 (proteasome-mediated ubiquitin-dependent protein catabolic process), GO:0019005 (SCF ubiquitin ligase complex), GO:0003674 (molecular_function), R-DME-392499 (Drosophila melanogaster: Metabolism of proteins), R-DME-597592 (Drosophila melanogaster: Post-translational protein modification), R-DME-8951664 (Drosophila melanogaster…	CBS	FBgn0036549		Predicted to be involved in proteasome-mediated ubiquitin-dependent protein catabolic process.
Fdh	protein_coding	Formaldehyde dehydrogenase	dme00071 (Fatty acid degradation), dme00982 (Drug metabolism - cytochrome P450), dme00980 (Metabolism of xenobiotics by cytochrome P450), dme00620 (Pyruvate metabolism), dme00350 (Tyrosine metabolism), dme00830 (Retinol metabolism), dme00010 (Glycolysis / Gluconeogenesis), dme01200 (Carbon metabolism), dme01100 (Metabolic pathways), GO:0006066 (alcohol metabolic process), GO:0006069 (ethanol oxid…	CBS	FBgn0011768		Functions as S-nitrosoglutathione reductase during the nitric oxide metabolism, contributing to visual memory.
Pdp1	protein_coding	PAR-domain protein 1	dme04711 (Circadian rhythm - fly), GO:0006357 (regulation of transcription from RNA polymerase II promoter), GO:0007623 (circadian rhythm), GO:0019216 (regulation of lipid metabolic process), GO:0045893 (positive regulation of transcription, DNA-templated), GO:0005634 (nucleus), GO:0000977 (RNA polymerase II regulatory region sequence-specific DNA binding), GO:0001228 (RNA polymerase II transcrip…	CBS	FBgn0016694		Encodes a member of the PAR domain bZip family of sequence-specific transcription factors. it regulates gene expression in muscles and in circadian clock neurons
CG34212	protein_coding		GO:0008150 (biological_process), GO:0005575 (cellular_component), GO:0003674 (molecular_function)	CBS	FBgn0085241		Its molecular function is unknown
AdenoK	protein_coding	Adenosine Kinase	dme01100 (Metabolic pathways), dme01232 (Nucleotide metabolism), dme00230 (Purine metabolism), GO:0006166 (purine ribonucleoside salvage), GO:0006167 (AMP biosynthetic process), GO:0005634 (nucleus), GO:0005654 (nucleoplasm), GO:0005829 (cytosol), GO:0004001 (adenosine kinase activity), R-DME-1430728 (Drosophila melanogaster: Metabolism), R-DME-15869 (Drosophila melanogaster: Metabolism of nucleo…	CBS	FBgn0036337		Predicted to enable adenosine kinase activity. Is expressed in several structures, including adult head
CG18003	protein_coding		dme01100 (Metabolic pathways), dme04146 (Peroxisome), dme00630 (Glyoxylate and dicarboxylate metabolism), dme01200 (Carbon metabolism), GO:0055114 (oxidation-reduction process), GO:0005777 (peroxisome), GO:0003973 ((S)-2-hydroxy-acid oxidase activity), GO:0010181 (FMN binding), R-DME-1430728 (Drosophila melanogaster: Metabolism), R-DME-390918 (Drosophila melanogaster: Peroxisomal lipid metabolism…	CBS	FBgn0061356		Predicted to enable (S)-2-hydroxy-acid oxidase activity. Is expressed in adult head and adult heart.
yellow-f	protein_coding	yellow-f	dme01100 (Metabolic pathways), dme00350 (Tyrosine metabolism), GO:0006583 (melanin biosynthetic process from tyrosine), GO:0042435 (indole-containing compound biosynthetic process), GO:0048066 (developmental pigmentation), GO:0005576 (extracellular region), GO:0004167 (dopachrome isomerase activity)	CBS	FBgn0041710		May play a role in melanization reactions during late pupal and adult stages. May play a role in melanization reactions during larval and early pupal stages.
eag	protein_coding	ether a go-go	GO:0006813 (potassium ion transport), GO:0007608 (sensory perception of smell), GO:0007611 (learning or memory), GO:0007612 (learning), GO:0007619 (courtship behavior), GO:0008016 (regulation of heart contraction), GO:0042066 (perineurial glial growth), GO:0042391 (regulation of membrane potential), GO:0048150 (behavioral response to ether), GO:0051259 (protein oligomerization), GO:0071805 (potas…	CBS	FBgn0000535		Structural component of a potassium channel. Mediates the potassium permeability of membranes; potassium current is regulated by CaMKII and CASK. Has a role in growth of the perineurial glial layer of the larval peripheral nerve.
Rdl	protein_coding	Resistant to dieldrin	dme04080 (Neuroactive ligand-receptor interaction), GO:0002121 (inter-male aggressive behavior), GO:0006811 (ion transport), GO:0007165 (signal transduction), GO:0007268 (synaptic transmission), GO:0009612 (response to mechanical stimulus), GO:0030431 (sleep), GO:0034220 (ion transmembrane transport), GO:0042048 (olfactory behavior), GO:0042391 (regulation of membrane potential), GO:0042493 (resp…	CBS	FBgn0004244		Resistant to dieldrin (Rdl) encodes a widely-expressed ligand-gated chloride channel which mediates the fast inhibitory effects of GABA. It has been shown to have roles in the circuits underlying visual processing, odor coding, learning and memory, sleep and courtship behavior.
sm	protein_coding	smooth	GO:0007411 (axon guidance), GO:0008340 (determination of adult lifespan), GO:0008343 (adult feeding behavior), GO:0005654 (nucleoplasm), GO:0003729 (mRNA binding)	CBS	FBgn0003435		Encodes an RNA binding, heterogeneous nuclear ribonucleoprotein involved in axon guidance, mRNA processing, chemosensation, determination of lifespan and feeding behavior.
CG33460	protein_coding		GO:0006508 (proteolysis)	CBS	FBgn0053460		Predicted to be involved in proteolysis.
CG5321	protein_coding		dme00310 (Lysine degradation), dme01100 (Metabolic pathways), GO:0045329 (carnitine biosynthetic process), GO:0055114 (oxidation-reduction process), GO:0005739 (mitochondrion), GO:0008336 (gamma-butyrobetaine dioxygenase activity), GO:0016702 (oxidoreductase activity, acting on single donors with incorporation of molecular oxygen, incorporation of two atoms of oxygen)	CBS	FBgn0030575		Predicted to enable gamma-butyrobetaine dioxygenase activity. Predicted to be involved in carnitine biosynthetic process.
CG42260	protein_coding		GO:0006812 (cation transport), GO:0019935 (cyclic-nucleotide-mediated signaling), GO:0055085 (transmembrane transport), GO:0017071 (intracellular cyclic nucleotide activated cation channel complex), GO:0005221 (intracellular cyclic nucleotide activated cation channel activity), GO:0005222 (intracellular cAMP activated cation channel activity), GO:0005223 (intracellular cGMP activated cation chann…	CBS	FBgn0259145		Encodes a protein predicted to form the beta subunit of a cyclic nucleotide-gated ion channel.
CG6126	protein_coding		GO:0055085 (transmembrane transport), GO:0016021 (integral component of membrane), GO:0022857 (transmembrane transporter activity), R-DME-112310 (Drosophila melanogaster: Neurotransmitter release cycle), R-DME-112311 (Drosophila melanogaster: Neurotransmitter clearance), R-DME-112315 (Drosophila melanogaster: Transmission across Chemical Synapses), R-DME-112316 (Drosophila melanogaster: Neuronal …	CBS	FBgn0038407		Predicted to enable transmembrane transporter activity. Predicted to be involved in transmembrane transport.
bru3	protein_coding	bruno 3	GO:0000381 (regulation of alternative mRNA splicing, via spliceosome), GO:0006376 (mRNA splice site selection), GO:0017148 (negative regulation of translation), GO:0005634 (nucleus), GO:0005737 (cytoplasm), GO:0032991 (macromolecular complex), GO:1990904 (NA), GO:0003723 (RNA binding), GO:0003729 (mRNA binding), GO:0042803 (protein homodimerization activity)	CBS	FBgn0264001		Encodes an RNA binding protein that binds to the EDEN element and mediates maternal mRNA translational repression.
mahe	protein_coding	maheshvara	dme03040 (Spliceosome), GO:0016246 (RNA interference), GO:0045746 (negative regulation of Notch signaling pathway), GO:0005634 (nucleus), GO:0005737 (cytoplasm), GO:1990904 (NA), GO:0003676 (nucleic acid binding), GO:0003723 (RNA binding), GO:0003724 (RNA helicase activity), GO:0005524 (ATP binding)	CBS	FBgn0029979		encodes an RNA helicase
orb2	protein_coding	orb2	dme04320 (Dorso-ventral axis formation), GO:0007141 (male meiosis I), GO:0007283 (spermatogenesis), GO:0007288 (sperm axoneme assembly), GO:0007291 (sperm individualization), GO:0007616 (long-term memory), GO:0008049 (male courtship behavior), GO:0008356 (asymmetric cell division), GO:0017148 (negative regulation of translation), GO:0045727 (positive regulation of translation), GO:2000766 (negati…	CBS	FBgn0264307		RNA-binding protein involved in translational regulation and required for long-term memory (PubMed:28525754, PubMed:29105522). Required in mushroom body gamma neurons for long-term memory in male courtship (PubMed:17965711, PubMed:23083740). Binds to mRNA 3'-UTRs (PubMed:20547833, PubMed:26638074, PubMed:24830287, PubMed:26095367, PubMed:32165583). In its monomeric form, acts as a translational r…
Trf2	protein_coding	TATA box binding protein-related factor 2	dme03022 (Basal transcription factors), GO:0006357 (regulation of transcription from RNA polymerase II promoter), GO:0006366 (transcription from RNA polymerase II promoter), GO:0006367 (transcription initiation from RNA polymerase II promoter), GO:0035071 (salivary gland cell autophagic cell death), GO:0035075 (response to ecdysone), GO:0035209 (pupal development), GO:0035277 (spiracle morphogene…	CBS	FBgn0261793		TATA box binding protein-related factor 2 (Trf2) encodes a core promoter recognition factor that mediates gene transcription. It contributes to spiracle morphogenesis, pupal development and salivary gland cell death.
CG8199	protein_coding		dme00280 (Valine, leucine and isoleucine degradation), dme00640 (Propanoate metabolism), dme01100 (Metabolic pathways), GO:0009083 (branched-chain amino acid catabolic process), GO:0046949 (fatty-acyl-CoA biosynthetic process), GO:0005947 (mitochondrial alpha-ketoglutarate dehydrogenase complex), GO:0017086 (3-methyl-2-oxobutanoate dehydrogenase (lipoamide) complex), GO:0003826 (alpha-ketoacid de…	CBS	FBgn0037709		Predicted to be involved in branched-chain amino acid catabolic process. Predicted to be part of mitochondrial alpha-ketoglutarate dehydrogenase complex. Is expressed in several structures, including adult head;
pan	protein_coding	pangolin	dme04310 (Wnt signaling pathway), GO:0006355 (regulation of transcription, DNA-templated), GO:0006357 (regulation of transcription from RNA polymerase II promoter), GO:0007367 (segment polarity determination), GO:0007435 (salivary gland morphogenesis), GO:0007476 (imaginal disc-derived wing morphogenesis), GO:0007500 (mesodermal cell fate determination), GO:0007507 (heart development), GO:0009880…	CBS	FBgn0085432		encodes an HMG-domain transcription factor that is a key component of the canonical Wingless signaling pathway. promote cell fate specification.
trv	protein_coding	trivet	GO:0000381 (regulation of alternative mRNA splicing, via spliceosome), GO:0005634 (nucleus), GO:0003676 (nucleic acid binding)	CBS	FBgn0085391		Predicted to enable nucleic acid binding activity. Involved in regulation of alternative mRNA splicing, via spliceosome.
bol	protein_coding	boule	GO:0006417 (regulation of translation), GO:0007281 (germ cell development), GO:0007283 (spermatogenesis), GO:0008315 (meiotic G2/MI transition), GO:0045924 (regulation of female receptivity), GO:0045948 (positive regulation of translational initiation), GO:0048137 (spermatocyte division), GO:0070935 (3'-UTR-mediated mRNA stabilization), GO:0005634 (nucleus), GO:0005737 (cytoplasm), GO:0043204 (pe…	CBS	FBgn0011206		encodes a translational regulator required in spermatogenesis for entry into meiosis and spermatid differentiation. It has an additional role in mushroom body γ neurons as a negative regulator of axon pruning.
CG5793	protein_coding		dme01100 (Metabolic pathways), dme00350 (Tyrosine metabolism), GO:0005739 (mitochondrion), GO:0016787 (hydrolase activity), GO:0018773 (acetylpyruvate hydrolase activity), R-DME-1428517 (Drosophila melanogaster: The citric acid (TCA) cycle and respiratory electron transport), R-DME-1430728 (Drosophila melanogaster: Metabolism), R-DME-71403 (Drosophila melanogaster: Citric acid cycle (TCA cycle)),…	CBS	FBgn0038858		Predicted to enable acetylpyruvate hydrolase activity.
SelG	protein_coding	Selenoprotein G	GO:0001700 (embryonic development via the syncytial blastoderm), GO:0006816 (calcium ion transport), GO:0007350 (blastoderm segmentation), GO:0008340 (determination of adult lifespan), GO:0009792 (embryo development ending in birth or egg hatching), GO:0010470 (regulation of gastrulation), GO:0032469 (endoplasmic reticulum calcium ion homeostasis), GO:0045454 (cell redox homeostasis), GO:0005789 …	CBS	FBgn0030350		encodes a type III Golgi apparatus transmembrane protein.
alpha-Est5	protein_coding	alpha-Esterase-5	GO:0052689 (carboxylic ester hydrolase activity)	CBS	FBgn0261393		Enables carboxylic ester hydrolase activity
CG32407	protein_coding			CBS	FBgn0052407		Predicted to enable phosphatidylinositol transfer activity. Predicted to be involved in phospholipid transport. Predicted to be located in endosome.
CG13086	protein_coding		GO:0030246 (carbohydrate binding)	CBS	FBgn0032770		Predicted to enable carbohydrate binding activity
spen	protein_coding	split ends	GO:0006351 (transcription, DNA-templated), GO:0006355 (regulation of transcription, DNA-templated), GO:0007173 (epidermal growth factor receptor signaling pathway), GO:0007379 (segment specification), GO:0007400 (neuroblast fate determination), GO:0007403 (glial cell fate determination), GO:0007411 (axon guidance), GO:0007422 (peripheral nervous system development), GO:0008586 (imaginal disc-deri…	CBS	FBgn0016977		Probable corepressor protein, which regulates different key pathways such as the EGF receptor and Wg pathways. Involved in neuronal cell fate, survival and axon guidance, cell cycle regulation and repression of head identity in the embryonic trunk.
Cpr76Bc	protein_coding	Cuticular protein 76Bc	GO:0040003 (chitin-based cuticle development), GO:0031012 (extracellular matrix), GO:0008010 (structural constituent of chitin-based larval cuticle), GO:0042302 (structural constituent of cuticle)	CBS	FBgn0036880		Predicted to be involved in chitin-based cuticle development.
CG18327	protein_coding			CBS	FBgn0033904		The solute carrier family 25 (SLC25) or mitochondrial carrier family (MCF) members shuttle metabolites, nucleotides and cofactors across the inner mitochondrial membrane.
chinmo	protein_coding	Chronologically inappropriate morphogenesis	GO:0001933 (negative regulation of protein phosphorylation), GO:0006357 (regulation of transcription from RNA polymerase II promoter), GO:0016319 (mushroom body development), GO:0019102 (male somatic sex determination), GO:0030838 (positive regulation of actin filament polymerization), GO:0035214 (eye-antennal disc development), GO:0048666 (neuron development), GO:0051170 (nuclear import), GO:200…	CBS	FBgn0086758		encodes a putative BTB-zinc finger transcription factor. It is essential for neuronal temporal patterning. It also plays a role in the regulation of eye development, tumor formation, and the self-renewal and/or sexual identity of male somatic cyst stem cells by acting downstream of JAK-STAT signaling.
				CBS	FBgn0013984
Cyp28a5	protein_coding	Cyp28a5	GO:0055114 (oxidation-reduction process), GO:0004497 (monooxygenase activity), GO:0005506 (iron ion binding), GO:0016705 (oxidoreductase activity, acting on paired donors, with incorporation or reduction of molecular oxygen), GO:0020037 (heme binding)	CBS	FBgn0028940		May be involved in the metabolism of insect hormones and in the breakdown of synthetic insecticides.
CG8738	protein_coding		GO:0006508 (proteolysis), GO:0005615 (extracellular space), GO:0004252 (serine-type endopeptidase activity)	CBS	FBgn0033321		Predicted to be involved in proteolysis.
CG33493	protein_coding		GO:0019731 (antibacterial humoral response), GO:0050829 (defense response to Gram-negative bacterium), GO:0050830 (defense response to Gram-positive bacterium), GO:0055093 (response to hyperoxia), GO:0005615 (extracellular space), GO:0003674 (molecular_function)	CBS	FBgn0053493		Its molecular function is unknown
CG11841	protein_coding		GO:0006508 (proteolysis), GO:0004252 (serine-type endopeptidase activity)	CBS	FBgn0039628		Predicted to enable serine-type endopeptidase activity. Predicted to be involved in proteolysis.
CG3534	protein_coding		dme00040 (Pentose and glucuronate interconversions), dme01100 (Metabolic pathways), GO:0005997 (xylulose metabolic process), GO:0016310 (phosphorylation), GO:0046835 (carbohydrate phosphorylation), GO:0005829 (cytosol), GO:0070062 (extracellular vesicular exosome), GO:0004856 (xylulokinase activity), R-DME-1430728 (Drosophila melanogaster: Metabolism), R-DME-5661270 (Drosophila melanogaster: Form…	CBS	FBgn0038463		Predicted to be involved in carbohydrate phosphorylation and xylulose metabolic process.
Pka-R2	protein_coding	Protein kinase, cAMP-dependent, regulatory subunit type 2	GO:0001932 (regulation of protein phosphorylation), GO:0007411 (axon guidance), GO:0007622 (rhythmic behavior), GO:0007623 (circadian rhythm), GO:0019934 (cGMP-mediated signaling), GO:0045475 (locomotor rhythm), GO:0048148 (behavioral response to cocaine), GO:0048149 (behavioral response to ethanol), GO:0071361 (cellular response to ethanol), GO:0005737 (cytoplasm), GO:0005829 (cytosol), GO:00058…	CBS	FBgn0022382		Regulatory subunit of the cAMP-dependent protein kinases involved in cAMP signaling in cells
Eip75B	protein_coding	Ecdysone-induced protein 75B	GO:0000122 (negative regulation of transcription from RNA polymerase II promoter), GO:0007275 (multicellular organismal development), GO:0007553 (regulation of ecdysteroid metabolic process), GO:0007591 (molting cycle, chitin-based cuticle), GO:0009755 (hormone-mediated signaling pathway), GO:0010468 (regulation of gene expression), GO:0018990 (ecdysis, chitin-based cuticle), GO:0019730 (antimicr…	CBS	FBgn0000568		The product of Eip75B regulates feeding behavior, fat deposition, and developmental timing in response to nitric oxide (NO) signaling. It also acts downstream from NO in the nervous system, where it controls neuronal remodeling.
CG10361	protein_coding		dme01100 (Metabolic pathways), dme00260 (Glycine, serine and threonine metabolism), GO:0006520 (cellular amino acid metabolic process), GO:0006567 (threonine catabolic process), GO:0009058 (biosynthetic process), GO:0005739 (mitochondrion), GO:0008890 (glycine C-acetyltransferase activity), GO:0030170 (pyridoxal phosphate binding), R-DME-1430728 (Drosophila melanogaster: Metabolism), R-DME-71291 …	CBS	FBgn0036208		Predicted to enable glycine C-acetyltransferase activity and pyridoxal phosphate binding activity. Predicted to be involved in biosynthetic process and threonine catabolic process.
CG17816	protein_coding		GO:0046600 (negative regulation of centriole replication), GO:0008017 (microtubule binding)	CBS	FBgn0037525		Predicted to enable microtubule binding activity. Is expressed in adult head.
heph	protein_coding	hephaestus	GO:0006397 (mRNA processing), GO:0007286 (spermatid development), GO:0007291 (sperm individualization), GO:0007319 (negative regulation of oskar mRNA translation), GO:0008103 (oocyte microtubule cytoskeleton polarization), GO:0008586 (imaginal disc-derived wing vein morphogenesis), GO:0008587 (imaginal disc-derived wing margin morphogenesis), GO:0005634 (nucleus), GO:0005737 (cytoplasm), GO:00058…	CBS	FBgn0011224		encodes a nucleo-cytoplasmic shuttling protein that regulates osk mRNA translation. It is involved in spermatid individualization and Notch signalling regulation
MP1	protein_coding	Melanization Protease 1	GO:0006508 (proteolysis), GO:0009620 (response to fungus), GO:0035006 (melanization defense response), GO:0004175 (endopeptidase activity), GO:0004252 (serine-type endopeptidase activity)	CBS	FBgn0027930		encodes a serine protease which plays an essential role in the melanization immune response,
CG14615	protein_coding		GO:0016747 (transferase activity, transferring acyl groups other than amino-acyl groups)	CBS	FBgn0031184		Predicted to enable acyltransferase activity
CG14629	protein_coding			CBS	FBgn0040398		IIts molecular function is unknown, it is expressed in adult head; amnioserosa; embryonic/larval circulatory system; embryonic/larval fat body; and yolk nucleus.
Mgstl	protein_coding	Microsomal glutathione S-transferase-like	dme00980 (Metabolism of xenobiotics by cytochrome P450), dme01100 (Metabolic pathways), dme00480 (Glutathione metabolism), dme00983 (Drug metabolism - other enzymes), dme00982 (Drug metabolism - cytochrome P450), GO:0001516 (prostaglandin biosynthetic process), GO:0055114 (oxidation-reduction process), GO:0005741 (mitochondrial outer membrane), GO:0043231 (intracellular membrane-bounded organelle…	CBS	FBgn0025814		Predicted to enable glutathione peroxidase activity and glutathione transferase activity.
Sema1a	protein_coding	Semaphorin 1a	GO:0001755 (neural crest cell migration), GO:0007411 (axon guidance), GO:0007416 (synapse assembly), GO:0008039 (synaptic target recognition), GO:0008045 (motor neuron axon guidance), GO:0016199 (axon midline choice point recognition), GO:0030335 (positive regulation of cell migration), GO:0045792 (negative regulation of cell size), GO:0048813 (dendrite morphogenesis), GO:0048843 (negative regula…	CBS	FBgn0011259		encodes a transmembrane protein belonging to the semaphorin protein family. It is a repulsive axon guidance cue, signaling through direct interactions with the receptor encoded by PlexA, and also functions as a receptor to regulate dendrite targeting and axon guidance
CG13397	protein_coding		dme01100 (Metabolic pathways), dme00531 (Glycosaminoglycan degradation), dme04142 (Lysosome), GO:0004561 (alpha-N-acetylglucosaminidase activity), R-DME-1430728 (Drosophila melanogaster: Metabolism), R-DME-1630316 (Drosophila melanogaster: Glycosaminoglycan metabolism), R-DME-1638091 (Drosophila melanogaster: Heparan sulfate/heparin (HS-GAG) metabolism), R-DME-2024096 (Drosophila melanogaster: HS…	CBS	FBgn0014417		Predicted to enable alpha-N-acetylglucosaminidase activity. Is expressed in adult fat body; adult head; and adult heart.
Gale	protein_coding	UDP-galactose 4'-epimerase	dme01250 (Biosynthesis of nucleotide sugars), dme00520 (Amino sugar and nucleotide sugar metabolism), dme01100 (Metabolic pathways), dme00052 (Galactose metabolism), GO:0006012 (galactose metabolic process), GO:0019388 (galactose catabolic process), GO:0033499 (galactose catabolic process via UDP-galactose), GO:0035167 (larval lymph gland hemopoiesis), GO:0005829 (cytosol), GO:0003974 (UDP-N-acet…	CBS	FBgn0035147		an enzyme that contributes to galactose catabolism and larval lymph gland hemopoiesis.
CG9664	protein_coding		dme02010 (ABC transporters), GO:0042048 (olfactory behavior), GO:0055085 (transmembrane transport), GO:0005886 (plasma membrane), GO:0005524 (ATP binding), GO:0042626 (ATPase activity, coupled to transmembrane movement of substances)	CBS	FBgn0031515		Predicted to enable ATPase-coupled transmembrane transporter activity. Involved in olfactory behavior.
Fkbp14	protein_coding	FK506-binding protein 14	GO:0007444 (imaginal disc development), GO:0008587 (imaginal disc-derived wing margin morphogenesis), GO:0022416 (chaeta development), GO:0045747 (positive regulation of Notch signaling pathway), GO:0046716 (muscle cell cellular homeostasis), GO:0005615 (extracellular space), GO:0005783 (endoplasmic reticulum), GO:0012505 (endomembrane system), GO:0005509 (calcium ion binding)	CBS	FBgn0010470		encodes an ER resident protein and a member of the large FKBP family of immunophilins. It plays an essential role in development
CG31029	protein_coding			CBS	FBgn0051029		Is expressed in spermatozoon.
Obp57a	protein_coding	Odorant-binding protein 57a	GO:0007606 (sensory perception of chemical stimulus), GO:1990834 (NA), GO:0005576 (extracellular region), GO:0005549 (odorant binding)	CBS	FBgn0043535		Present in the aqueous fluid surrounding olfactory sensory dendrites and are thought to aid in the capture and transport of hydrophobic odorants into and through this fluid.
eIF4H1	protein_coding	eukaryotic translation initiation factor 4H1	GO:0001731 (formation of translation preinitiation complex), GO:0002181 (cytoplasmic translation), GO:0006413 (translational initiation), GO:0097010 (eukaryotic translation initiation factor 4F complex assembly), GO:0005829 (cytosol), GO:0005844 (polysome), GO:0003729 (mRNA binding), GO:0003743 (translation initiation factor activity), GO:0033592 (RNA strand annealing activity), GO:0034057 (RNA s…	CBS	FBgn0262734		Predicted to enable RNA binding activity and ribosomal small subunit binding activity. Is expressed in adult head.
CG14984	protein_coding		GO:0008150 (biological_process), GO:0005575 (cellular_component), GO:0003674 (molecular_function)	CBS	FBgn0035480		Its molecular function is unknown
CG45050	protein_coding		GO:0008150 (biological_process), GO:0005575 (cellular_component), GO:0003674 (molecular_function), GO:0003677 (DNA binding), GO:0008270 (zinc ion binding)	CBS	FBgn0266410		Predicted to enable DNA binding activity and zinc ion binding activity.
Lip2	protein_coding	Lipase 2	GO:0044255 (cellular lipid metabolic process), GO:0016298 (lipase activity), R-DME-1266738 (Drosophila melanogaster: Developmental Biology), R-DME-6805567 (Drosophila melanogaster: Keratinization), R-DME-6809371 (Drosophila melanogaster: Formation of the cornified envelope)	CBS	FBgn0024740		Predicted to enable triglyceride lipase activity. Predicted to be involved in lipid metabolic process.
dpr9	protein_coding	defective proboscis extension response 9	GO:0007606 (sensory perception of chemical stimulus), GO:0048149 (behavioral response to ethanol), GO:0050808 (synapse organization), GO:0005887 (integral component of plasma membrane), GO:0032589 (neuron projection membrane), GO:0003674 (molecular_function)	CBS	FBgn0038282		Involved in behavioral response to ethanol and synapse organization.
CG11459	protein_coding		dme04145 (Phagosome), dme04140 (Autophagy - animal), dme04142 (Lysosome), GO:0051603 (proteolysis involved in cellular protein catabolic process), GO:0005615 (extracellular space), GO:0005764 (lysosome), GO:0004197 (cysteine-type endopeptidase activity), R-DME-1280218 (Drosophila melanogaster: Adaptive Immune System), R-DME-168256 (Drosophila melanogaster: Immune System), R-DME-212436 (Drosophila…	CBS	FBgn0037396		Predicted to enable cysteine-type endopeptidase activity. Predicted to be involved in immune response and proteolysis involved in cellular protein catabolic process.
CG8132	protein_coding		dme01100 (Metabolic pathways), dme00250 (Alanine, aspartate and glutamate metabolism), GO:0006107 (oxaloacetate metabolic process), GO:0006528 (asparagine metabolic process), GO:0006541 (glutamine metabolic process), GO:0050152 (omega-amidase activity), R-DME-168249 (Drosophila melanogaster: Innate Immune System), R-DME-168256 (Drosophila melanogaster: Immune System), R-DME-6798695 (Drosophila me…	CBS	FBgn0037687		Predicted to be involved in asparagine metabolic process; glutamine metabolic process; and oxaloacetate metabolic process.
Aprt	protein_coding	Adenine phosphoribosyltransferase	dme01232 (Nucleotide metabolism), dme00230 (Purine metabolism), dme01100 (Metabolic pathways), GO:0006168 (adenine salvage), GO:0009116 (nucleoside metabolic process), GO:0044209 (AMP salvage), GO:0005737 (cytoplasm), GO:0002055 (adenine binding), GO:0003999 (adenine phosphoribosyltransferase activity), GO:0016208 (AMP binding), R-DME-1430728 (Drosophila melanogaster: Metabolism), R-DME-15869 (Dr…	CBS	FBgn0000109		Catalyzes a salvage reaction resulting in the formation of AMP, that is energically less costly than de novo synthesis.
PRL-1	protein_coding	PRL-1 phosphatase	GO:0035335 (peptidyl-tyrosine dephosphorylation), GO:0005634 (nucleus), GO:0005737 (cytoplasm), GO:0005886 (plasma membrane), GO:0004725 (protein tyrosine phosphatase activity), GO:0008138 (protein tyrosine/serine/threonine phosphatase activity), R-DME-392499 (Drosophila melanogaster: Metabolism of proteins), R-DME-597592 (Drosophila melanogaster: Post-translational protein modification), R-DME-8…	CBS	FBgn0024734		encodes a growth inhibitor that counteracts the function of the product of the Src42A oncogene.
				CBS	FBgn0030758
ct	protein_coding	cut	GO:0000122 (negative regulation of transcription from RNA polymerase II promoter), GO:0006355 (regulation of transcription, DNA-templated), GO:0007417 (central nervous system development), GO:0007422 (peripheral nervous system development), GO:0007424 (open tracheal system development), GO:0007443 (Malpighian tubule morphogenesis), GO:0007469 (antennal development), GO:0007605 (sensory perception…	CBS	FBgn0004198		It is a regulator of type-specific neuronal identity in the peripheral nervous system.
DCP2	protein_coding	Decapping protein 2	dme03018 (RNA degradation), GO:0000290 (deadenylation-dependent decapping of nuclear-transcribed mRNA), GO:0000956 (nuclear-transcribed mRNA catabolic process), GO:0010603 (regulation of cytoplasmic mRNA processing body assembly), GO:0035195 (gene silencing by miRNA), GO:0000932 (cytoplasmic mRNA processing body), GO:0005737 (cytoplasm), GO:0003723 (RNA binding), GO:0005515 (protein binding), GO:…	CBS	FBgn0036534		involved in gene silencing by miRNA and the regulation of cytoplasmic mRNA processing body assembly
Cals	protein_coding	Calsyntenin-1	GO:0007156 (homophilic cell adhesion via plasma membrane adhesion molecules), GO:0016339 (calcium-dependent cell-cell adhesion via plasma membrane cell adhesion molecules), GO:0044331 (cell-cell adhesion mediated by cadherin), GO:0050806 (positive regulation of synaptic transmission), GO:0051965 (positive regulation of synapse assembly), GO:0005576 (extracellular region), GO:0005887 (integral com…	CBS	FBgn0039928		May modulate calcium-mediated postsynaptic signals.
Cyp12a5	protein_coding	Cyp12a5	GO:0055114 (oxidation-reduction process), GO:0005506 (iron ion binding), GO:0016491 (oxidoreductase activity), GO:0016705 (oxidoreductase activity, acting on paired donors, with incorporation or reduction of molecular oxygen), GO:0020037 (heme binding)	CBS	FBgn0038680		Predicted to enable heme binding activity; iron ion binding activity; and oxidoreductase activity, acting on paired donors, with incorporation or reduction of molecular oxygen. Is expressed in adult head; embryonic/larval Malpighian tubule; embryonic/larval midgut; and gastric caecum.
unk	protein_coding	unkempt	GO:0002164 (larval development), GO:0007476 (imaginal disc-derived wing morphogenesis), GO:0008407 (chaeta morphogenesis), GO:0030182 (neuron differentiation), GO:0048749 (compound eye development), GO:0050767 (regulation of neurogenesis), GO:0005737 (cytoplasm), GO:0003677 (DNA binding), GO:0008270 (zinc ion binding), GO:0046872 (metal ion binding), R-DME-1280218 (Drosophila melanogaster: Adapti…	CBS	FBgn0004395		a highly conserved protein with roles in mRNA binding and ubiquitination. regulate photoreceptor differentiation during eye development.
bgm	protein_coding	bubblegum	dme01212 (Fatty acid metabolism), dme00071 (Fatty acid degradation), dme00061 (Fatty acid biosynthesis), dme01100 (Metabolic pathways), GO:0001676 (long-chain fatty acid metabolic process), GO:0006631 (fatty acid metabolic process), GO:0006633 (fatty acid biosynthetic process), GO:0034976 (response to endoplasmic reticulum stress), GO:0045938 (positive regulation of circadian sleep/wake cycle, sl…	CBS	FBgn0027348		Mediates activation of long-chain fatty acids for both synthesis of cellular lipids, and degradation via beta-oxidation, plays a role in neuronal function
bbg	protein_coding	big bang	GO:0002227 (innate immune response in mucosa), GO:0007298 (border follicle cell migration), GO:0005634 (nucleus), GO:0005918 (septate junction), GO:0045177 (apical part of cell), R-DME-1280215 (Drosophila melanogaster: Cytokine Signaling in Immune system), R-DME-168256 (Drosophila melanogaster: Immune System), R-DME-449147 (Drosophila melanogaster: Signaling by Interleukins), R-DME-449836 (Drosop…	CBS	FBgn0087007		Involved in border follicle cell migration and imaginal disc-derived wing morphogenesis.
CG8501	protein_coding			CBS	FBgn0033724		Its molecular function is unknown
CG43679	protein_coding		GO:0008150 (biological_process), GO:0005575 (cellular_component), GO:0003674 (molecular_function)	CBS	FBgn0263762		Its molecular function is unknown
et	protein_coding	eye transformer	GO:0007259 (JAK-STAT cascade), GO:0042532 (negative regulation of tyrosine phosphorylation of STAT protein), GO:0042742 (defense response to bacterium), GO:0046426 (negative regulation of JAK-STAT cascade), GO:0016020 (membrane), GO:0004896 (cytokine receptor activity), GO:0042803 (protein homodimerization activity), GO:0046982 (protein heterodimerization activity), GO:0097677 (NA), GO:1990782 (N…	CBS	FBgn0031055		type 1 cytokine receptor in the JAK/STAT pathway that behaves as a dominant negative receptor.
Nepl13	protein_coding	Neprilysin-like 13	GO:0006508 (proteolysis), GO:0005576 (extracellular region), GO:0004222 (metalloendopeptidase activity), R-DME-168249 (Drosophila melanogaster: Innate Immune System), R-DME-168256 (Drosophila melanogaster: Immune System), R-DME-2022377 (Drosophila melanogaster: Metabolism of Angiotensinogen to Angiotensins), R-DME-2980736 (Drosophila melanogaster: Peptide hormone metabolism), R-DME-392499 (Drosop…	CBS	FBgn0039022		Predicted to be involved in protein processing.
NetB	protein_coding	Netrin-B	GO:0007411 (axon guidance), GO:0007432 (salivary gland boundary specification), GO:0008039 (synaptic target recognition), GO:0008045 (motor neuron axon guidance), GO:0008347 (glial cell migration), GO:0009887 (organ morphogenesis), GO:0009888 (tissue development), GO:0016200 (synaptic target attraction), GO:0016358 (dendrite development), GO:0048749 (compound eye development), GO:0070983 (dendrit…	CBS	FBgn0015774		Netrins control guidance of CNS commissural axons and peripheral motor axons
CG33307	protein_coding		GO:0008150 (biological_process), GO:0005575 (cellular_component), GO:0003674 (molecular_function)	CBS	FBgn0053307		Its molecular function is unknown
Frq1	protein_coding	Frequenin 1	GO:0007268 (synaptic transmission), GO:0007269 (neurotransmitter secretion), GO:0007528 (neuromuscular junction development), GO:0046928 (regulation of neurotransmitter secretion), GO:0005509 (calcium ion binding), GO:0008048 (calcium sensitive guanylate cyclase activator activity)	CBS	FBgn0030897		Ca(2+)-dependent modulation of synaptic efficacy.
Rim	protein_coding	Rab3 interacting molecule	GO:0006886 (intracellular protein transport), GO:0007269 (neurotransmitter secretion), GO:0007274 (neuromuscular synaptic transmission), GO:0016079 (synaptic vesicle exocytosis), GO:0016192 (vesicle-mediated transport), GO:0017156 (calcium ion-dependent exocytosis), GO:0048167 (regulation of synaptic plasticity), GO:0070073 (clustering of voltage-gated calcium channels), GO:0008021 (synaptic vesi…	CBS	FBgn0053547		encodes a scaffolding protein at the synaptic active zone, with important roles in promoting neurotransmitter release.
CG5590	protein_coding		GO:0005777 (peroxisome)	CBS	FBgn0039537		Predicted to be located in peroxisome. Predicted to be active in mitochondrion.
CG11905	protein_coding			CBS	FBgn0036678		Is expressed in embryonic/larval tracheal system
CG8708	protein_coding		dme01100 (Metabolic pathways), dme00514 (Other types of O-glycan biosynthesis), dme00512 (Mucin type O-glycan biosynthesis), GO:0006486 (protein glycosylation), GO:0016267 (O-glycan processing, core 1), GO:0005797 (Golgi medial cisterna), GO:0016020 (membrane), GO:0016263 (glycoprotein-N-acetylgalactosamine 3-beta-galactosyltransferase activity), GO:0048531 (beta-1,3-galactosyltransferase activit…	CBS	FBgn0033271		Involved in protein glycosylation. Located in Golgi medial cisterna. Is expressed in adult head; gland; male reproductive system; and salivary gland body primordium.
nAChRalpha7	protein_coding	nicotinic Acetylcholine Receptor alpha7	GO:0006812 (cation transport), GO:0007165 (signal transduction), GO:0007268 (synaptic transmission), GO:0007271 (synaptic transmission, cholinergic), GO:0007630 (jump response), GO:0007632 (visual behavior), GO:0034220 (ion transmembrane transport), GO:0042391 (regulation of membrane potential), GO:0050877 (neurological system process), GO:0060079 (regulation of excitatory postsynaptic membrane p…	CBS	FBgn0086778		nicotinic Acetylcholine Receptor α7 (nAChRα7) encodes a subunit of the nicotinic acetylcholine receptor, a pentameric neurotransmitter-gated ion channel.
Mtap	protein_coding	Methylthioadenosine phosphorylase	dme01100 (Metabolic pathways), dme00270 (Cysteine and methionine metabolism), GO:0009116 (nucleoside metabolic process), GO:0019509 (L-methionine biosynthetic process from methylthioadenosine), GO:0005737 (cytoplasm), GO:0005829 (cytosol), GO:0017061 (S-methyl-5-thioadenosine phosphorylase activity), R-DME-1237112 (Drosophila melanogaster: Methionine salvage pathway), R-DME-1430728 (Drosophila me…	CBS	FBgn0034215		an enzyme that plays a key role in the methionine salvage pathway and in the production of endogenous cellular adenine.
BomBc3	protein_coding	Bomanin Bicipital 3	GO:0005615 (extracellular space)	CBS	FBgn0040582		Predicted to be located in extracellular space.
PGRP-SA	protein_coding	Peptidoglycan recognition protein SA	dme04624 (Toll and Imd signaling pathway), GO:0006965 (positive regulation of biosynthetic process of antibacterial peptides active against Gram-positive bacteria), GO:0009253 (peptidoglycan catabolic process), GO:0019730 (antimicrobial humoral response), GO:0032494 (response to peptidoglycan), GO:0032827 (negative regulation of natural killer cell differentiation involved in immune response), GO…	CBS	FBgn0030310		encodes a secreted protein that mediates Toll pathway activation during bacterial infection.
PlexA	protein_coding	Plexin A	GO:0007162 (negative regulation of cell adhesion), GO:0007265 (Ras protein signal transduction), GO:0007411 (axon guidance), GO:0008045 (motor neuron axon guidance), GO:0008360 (regulation of cell shape), GO:0016199 (axon midline choice point recognition), GO:0030334 (regulation of cell migration), GO:0031284 (positive regulation of guanylate cyclase activity), GO:0043087 (regulation of GTPase ac…	CBS	FBgn0025741		a transmembrane receptor for Semaphorin ligands. The signaling by the product of PlexA alters actin, microtubules and cell adhesion in developmental processes such as axon guidance.
CG5707	protein_coding		GO:0008150 (biological_process), GO:0005575 (cellular_component), GO:0003674 (molecular_function)	CBS	FBgn0026593		Enables serine hydrolase activity. Is expressed in adult head and organism.
Drsl5	protein_coding	Drosomycin-like 5	dme04624 (Toll and Imd signaling pathway), GO:0050832 (defense response to fungus), GO:0005576 (extracellular region), GO:0003674 (molecular_function)	CBS	FBgn0035434		encodes a secreted peptide with homology to the antifungal peptide encoded by Drs.
Cln3	protein_coding	Cln3	dme04142 (Lysosome), GO:0006979 (response to oxidative stress), GO:0007040 (lysosome organization), GO:0008340 (determination of adult lifespan), GO:0015809 (arginine transport), GO:0046328 (regulation of JNK cascade), GO:0051453 (regulation of intracellular pH), GO:0005764 (lysosome), GO:0005770 (late endosome), GO:0016324 (apical plasma membrane), GO:0031528 (microvillus membrane), GO:0031966 (…	CBS	FBgn0036756		Involved in determination of adult lifespan; regulation of JNK cascade; and response to oxidative stress.
CG14715	protein_coding		GO:0012505 (endomembrane system)	CBS	FBgn0037930		Predicted to enable FK506 binding activity and peptidyl-prolyl cis-trans isomerase activity
Dera	protein_coding	Deoxyribose-phosphate aldolase	dme01100 (Metabolic pathways), dme00030 (Pentose phosphate pathway), GO:0009264 (deoxyribonucleotide catabolic process), GO:0016052 (carbohydrate catabolic process), GO:0005737 (cytoplasm), GO:0004139 (deoxyribose-phosphate aldolase activity), R-DME-1430728 (Drosophila melanogaster: Metabolism), R-DME-168249 (Drosophila melanogaster: Innate Immune System), R-DME-168256 (Drosophila melanogaster: I…	CBS	FBgn0033735		Predicted to enable deoxyribose-phosphate aldolase activity.
Traf6	protein_coding	TNF-receptor-associated factor 6	dme04214 (Apoptosis - fly), dme04013 (MAPK signaling pathway - fly), dme04120 (Ubiquitin mediated proteolysis), dme04140 (Autophagy - animal), dme04144 (Endocytosis), GO:0000209 (protein polyubiquitination), GO:0007391 (dorsal closure), GO:0008219 (cell death), GO:0010508 (positive regulation of autophagy), GO:0031098 (stress-activated protein kinase signaling cascade), GO:0043122 (regulation of …	BE	FBgn0265464		encodes a protein that belongs to a family of adaptor proteins involved in transducing downstream signaling by interacting with cell surface receptors. It mediates the pro-inflammatory effects of Toll and related receptor signaling, and the cell death induced by JNK activation via the product of egr.
CG31676	protein_coding			BE	FBgn0051676		Predicted to be involved in positive regulation of voltage-gated potassium channel activity; regulation of cholinergic synaptic transmission; and sleep.
Nepl21	protein_coding	Neprilysin-like 21	GO:0006508 (proteolysis), GO:0005576 (extracellular region), GO:0004222 (metalloendopeptidase activity)	BE	FBgn0027578		Predicted to be involved in protein processing.
snRNA:U2:34ABa	snRNA	small nuclear RNA U2 at 34AB a		BE	FBgn0004191		Predicted to be involved in mRNA splicing, via spliceosome.
CG42876	protein_coding		GO:0008150 (biological_process), GO:0005575 (cellular_component), GO:0003674 (molecular_function)	BE	FBgn0262150		Its molecular function is unknown
LManII	protein_coding	Lysosomal alpha-mannosidase II	dme04142 (Lysosome), dme00511 (Other glycan degradation), GO:0006013 (mannose metabolic process), GO:0006517 (protein deglycosylation), GO:0005576 (extracellular region), GO:0005774 (vacuolar membrane), GO:0004559 (alpha-mannosidase activity), GO:0004571 (mannosyl-oligosaccharide 1,2-alpha-mannosidase activity), GO:0030246 (carbohydrate binding), R-DME-1430728 (Drosophila melanogaster: Metabolism…	BE	FBgn0027611		involved in the degradation of asparagine-linked carbohydrates of glycoproteins
Glt	protein_coding	Glutactin	GO:0008045 (motor neuron axon guidance), GO:0016201 (synaptic target inhibition), GO:0098542 (defense response to other organism), GO:0005604 (basement membrane)	BE	FBgn0001114		cholinesterase/carboxylesterase-like proteins. It forms part of the basement membrane and regulates axonal outgrowth.
Cyp4d21	protein_coding	Cyp4d21	GO:0007618 (mating), GO:0055114 (oxidation-reduction process), GO:0005737 (cytoplasm), GO:0004497 (monooxygenase activity), GO:0005506 (iron ion binding), GO:0016705 (oxidoreductase activity, acting on paired donors, with incorporation or reduction of molecular oxygen), GO:0020037 (heme binding), R-DME-1430728 (Drosophila melanogaster: Metabolism), R-DME-193144 (Drosophila melanogaster: Estrogen …	BE	FBgn0031925		May be involved in the metabolism of insect hormones and in the breakdown of synthetic insecticides.
CG1673	protein_coding		dme00290 (Valine, leucine and isoleucine biosynthesis), dme00270 (Cysteine and methionine metabolism), dme00770 (Pantothenate and CoA biosynthesis), dme01100 (Metabolic pathways), dme01240 (Biosynthesis of cofactors), dme00280 (Valine, leucine and isoleucine degradation), dme01230 (Biosynthesis of amino acids), dme01210 (2-Oxocarboxylic acid metabolism), GO:0009082 (branched-chain amino acid bios…	BE	FBgn0030482		Predicted to enable branched-chain-amino-acid transaminase activity. Is expressed in adult head and spermatozoon.
CG9331	protein_coding		GO:0055114 (oxidation-reduction process), GO:0005576 (extracellular region), GO:0005829 (cytosol), GO:0008465 (glycerate dehydrogenase activity), GO:0016616 (oxidoreductase activity, acting on the CH-OH group of donors, NAD or NADP as acceptor), GO:0016618 (hydroxypyruvate reductase activity), GO:0030267 (glyoxylate reductase (NADP) activity), GO:0051287 (NAD binding)	BE	FBgn0032889		Predicted to enable glycerate dehydrogenase activity; glyoxylate reductase (NADP+) activity; and hydroxypyruvate reductase activity. Is expressed in adult head; adult heart; embryonic epidermis; embryonic/larval midgut; and yolk nucleus.
SPH93	protein_coding	Serine protease homolog 93	GO:0006508 (proteolysis), GO:0050830 (defense response to Gram-positive bacterium), GO:0005615 (extracellular space), GO:0004252 (serine-type endopeptidase activity)	BE	FBgn0032638		Involved in defense response to Gram-positive bacterium. Predicted to be active in extracellular space. Orthologous to human TPSAB1
igl	protein_coding	igloo	GO:0007339 (binding of sperm to zona pellucida), GO:0005938 (cell cortex), GO:0016020 (membrane), GO:0005516 (calmodulin binding), R-DME-112314 (Drosophila melanogaster: Neurotransmitter receptors and postsynaptic signal transmission), R-DME-112315 (Drosophila melanogaster: Transmission across Chemical Synapses), R-DME-112316 (Drosophila melanogaster: Neuronal System), R-DME-1266738 (Drosophila m…	BE	FBgn0013467		encodes a calmodulin binding protein.
NimC1	protein_coding	Nimrod C1	GO:0006909 (phagocytosis), GO:0042742 (defense response to bacterium), GO:0005886 (plasma membrane), GO:0016021 (integral component of membrane), GO:0003674 (molecular_function)	BE	FBgn0259896		Involved in mesoderm development. Predicted to be located in extracellular region.
apolpp	protein_coding	apolipophorin	GO:0006869 (lipid transport), GO:0045880 (positive regulation of smoothened signaling pathway), GO:0090263 (positive regulation of canonical Wnt signaling pathway), GO:0005576 (extracellular region), GO:0005615 (extracellular space), GO:0030139 (endocytic vesicle), GO:0045178 (basal part of cell), GO:0005102 (receptor binding), GO:0005319 (lipid transporter activity), GO:0005504 (fatty acid bindi…	BE	FBgn0087002		assemble the major hemolymph lipoprotein; transports neutral lipids, phospholipids and sterols between tissues.
CG11700	protein_coding		dme04137 (Mitophagy - animal), dme04120 (Ubiquitin mediated proteolysis), GO:0008340 (determination of adult lifespan), GO:0016567 (protein ubiquitination), GO:0019941 (modification-dependent protein catabolic process), GO:2000242 (negative regulation of reproductive process), GO:0005634 (nucleus), GO:0005737 (cytoplasm), GO:0031386 (protein tag), GO:0031625 (ubiquitin protein ligase binding), R-…	BE	FBgn0029856		Predicted to enable protein tag and ubiquitin protein ligase binding activity. Involved in determination of adult lifespan and negative regulation of reproductive process.
Lip4	protein_coding	Lipase 4	dme04142 (Lysosome), dme00100 (Steroid biosynthesis), GO:0044255 (cellular lipid metabolic process), GO:0016298 (lipase activity), R-DME-1266738 (Drosophila melanogaster: Developmental Biology), R-DME-192456 (Drosophila melanogaster: Digestion of dietary lipid), R-DME-6805567 (Drosophila melanogaster: Keratinization), R-DME-6809371 (Drosophila melanogaster: Formation of the cornified envelope), R…	BE	FBgn0032264		Enables serine hydrolase activity. Predicted to be involved in lipid catabolic process. Predicted to be located in lipid droplet. Is expressed in adult head; amnioserosa; and yolk nucleus.
ps	protein_coding	pasilla	GO:0000381 (regulation of alternative mRNA splicing, via spliceosome), GO:0033120 (positive regulation of RNA splicing), GO:0005634 (nucleus), GO:0005829 (cytosol), GO:0097157 (pre-mRNA intronic binding)	BE	FBgn0261552		encodes a nuclear RNA binding protein implicated in splicing.
NimB2	protein_coding	Nimrod B2	GO:0007498 (mesoderm development), GO:0042742 (defense response to bacterium), GO:0005576 (extracellular region), GO:0003674 (molecular_function)	BE	FBgn0028543		Involved in mesoderm development.
ctp	protein_coding	cut up	GO:0000132 (establishment of mitotic spindle orientation), GO:0006914 (autophagy), GO:0007283 (spermatogenesis), GO:0007290 (spermatid nucleus elongation), GO:0007291 (sperm individualization), GO:0007476 (imaginal disc-derived wing morphogenesis), GO:0008407 (chaeta morphogenesis), GO:0022416 (chaeta development), GO:0034454 (microtubule anchoring at centrosome), GO:0035071 (salivary gland cell …	BE	FBgn0011760		It homodimerizes and binds to a variety of proteins. It is involved in both dynein-dependent and independent functions such as cell viability, axonal guidance, spermatid growth and individualization, and regulation of spermatogonial divisions.
Cam	protein_coding	Calmodulin	dme04745 (Phototransduction - fly), dme04070 (Phosphatidylinositol signaling system), GO:0006468 (protein phosphorylation), GO:0007099 (centriole replication), GO:0007605 (sensory perception of sound), GO:0007608 (sensory perception of smell), GO:0016056 (rhodopsin mediated signaling pathway), GO:0016059 (deactivation of rhodopsin mediated signaling), GO:0016060 (metarhodopsin inactivation), GO:0…	BE	FBgn0000253		Calmodulin (Cam) encodes a Calcium-binding messenger protein. It acts as a part of the calcium signal transduction pathway and interacts with various target proteins such as kinases or phosphatases. It is involved in actin filament-based movement, mitotic spinde assembly, axon guidance, DNA damage response, autophagy, cell death, sensory perception, and muscle homeostasis.
Spn43Ab	protein_coding	Serpin 43Ab	GO:0010951 (negative regulation of endopeptidase activity), GO:0032504 (multicellular organism reproduction), GO:0005615 (extracellular space), GO:0004867 (serine-type endopeptidase inhibitor activity), R-DME-109582 (Drosophila melanogaster: Hemostasis), R-DME-114608 (Drosophila melanogaster: Platelet degranulation ), R-DME-1474244 (Drosophila melanogaster: Extracellular matrix organization), R-D…	BE	FBgn0024293		Involved in multicellular organism reproduction.Is expressed in adult head; adult heart; and spermatozoon.
Srp54	protein_coding	Splicing regulatory protein 54	GO:0000381 (regulation of alternative mRNA splicing, via spliceosome), GO:0000398 (mRNA splicing, via spliceosome), GO:0001178 (regulation of transcriptional start site selection at RNA polymerase II promoter), GO:0010468 (regulation of gene expression), GO:0031440 (regulation of mRNA 3'-end processing), GO:0005634 (nucleus), GO:0005654 (nucleoplasm), GO:0071011 (precatalytic spliceosome), GO:007…	BE	FBgn0024285		encodes a protein that regulates mRNA alternative splicing, the processing of the mRNA 3'-end and the selection of the transcriptional start site.
CG17508	protein_coding			BE	FBgn0039970		Predicted to be active in mitochondrion. Is expressed in adult head; embryonic/larval midgut; and organism.
Ih	protein_coding	I[[h]] channel	GO:0006813 (potassium ion transport), GO:0007637 (proboscis extension reflex), GO:0008340 (determination of adult lifespan), GO:0014059 (regulation of dopamine secretion), GO:0016057 (regulation of membrane potential in photoreceptor cell), GO:0045475 (locomotor rhythm), GO:0045938 (positive regulation of circadian sleep/wake cycle, sleep), GO:0050802 (circadian sleep/wake cycle, sleep), GO:00550…	BE	FBgn0263397		encodes a low-threshold, voltage-gated ion channel. It may influence excitatory postsynaptic potential kinetics and integration.
CG32280	protein_coding		GO:0008150 (biological_process), GO:0005575 (cellular_component), GO:0003674 (molecular_function)	BE	FBgn0052280		Predicted to enable zinc ion binding activity. Orthologous to human CDIP1 (cell death inducing p53 target 1).
dsb	protein_coding	debris buster	GO:0090382 (phagosome maturation), GO:0005764 (lysosome), GO:0016020 (membrane), GO:0045335 (phagocytic vesicle)	BE	FBgn0035290		encodes a double-span transmembrane protein of the CD36 family residing in late endosomes and lysosomes. It is required for late stage phagosome maturation.
Prat2	protein_coding	Phosphoribosylamidotransferase 2	dme00230 (Purine metabolism), dme00250 (Alanine, aspartate and glutamate metabolism), dme01100 (Metabolic pathways), GO:0009113 (purine nucleobase biosynthetic process), GO:0009116 (nucleoside metabolic process), GO:0004044 (amidophosphoribosyltransferase activity)	BE	FBgn0041194		participates in de novo synthesis of inosine monophosphate (IMP). IMP is the precursor for purine nucleotides that are required for nucleic acids, energy transfer, cell signaling, and coenzymes.
sgg	protein_coding	shaggy	dme04310 (Wnt signaling pathway), dme04341 (Hedgehog signaling pathway - fly), dme04150 (mTOR signaling pathway), dme04711 (Circadian rhythm - fly), GO:0003382 (epithelial cell morphogenesis), GO:0006468 (protein phosphorylation), GO:0007051 (spindle organization), GO:0007143 (female meiotic division), GO:0007165 (signal transduction), GO:0007367 (segment polarity determination), GO:0007507 (hear…	BE	FBgn0003371		sgg) encodes a glycogen synthase kinase 3, and a key component of the β-catenin destruction complex. It functions in the canonical Wnt cascade.
CG15293	protein_coding		GO:0005576 (extracellular region)	BE	FBgn0028526		Located in extracellular region. Is expressed in adult head; adult heart; and embryonic/larval hemolymph.
Mal-B1	protein_coding	Maltase B1	dme00052 (Galactose metabolism), dme00500 (Starch and sucrose metabolism), dme01100 (Metabolic pathways), GO:0005975 (carbohydrate metabolic process), GO:0032450 (maltose alpha-glucosidase activity)	BE	FBgn0032381		Predicted to enable maltose alpha-glucosidase activity. Predicted to be involved in carbohydrate metabolic process. Is expressed in adult fat body and adult head.
Vap33	protein_coding	VAMP-associated protein 33kDa	GO:0007269 (neurotransmitter secretion), GO:0007528 (neuromuscular junction development), GO:0008088 (axon cargo transport), GO:0016082 (synaptic vesicle priming), GO:0031122 (cytoplasmic microtubule organization), GO:0046488 (phosphatidylinositol metabolic process), GO:0050829 (defense response to Gram-negative bacterium), GO:0060074 (synapse maturation), GO:0061817 (NA), GO:0070972 (protein loc…	BE	FBgn0029687		VAMP-associated protein 33kDa (Vap33) encodes a protein that plays a conserved role in synaptic homeostasis. It controls a number of processes which depend on phosphoinositide levels, such as synaptic growth and axonal transport. It binds to the product of Sac1 to maintain normal levels of phosphoinositides and to the product of Dscam1 to affect its localization within axonal projections
D2hgdh	protein_coding	D-2-hydroxyglutaric acid dehydrogenase	GO:0019516 (lactate oxidation), GO:0022904 (respiratory electron transport chain), GO:0055114 (oxidation-reduction process), GO:0005739 (mitochondrion), GO:0031234 (extrinsic component of cytoplasmic side of plasma membrane), GO:0004458 (D-lactate dehydrogenase (cytochrome) activity), GO:0051990 ((R)-2-hydroxyglutarate dehydrogenase activity), GO:0071949 (FAD binding), R-DME-1428517 (Drosophila m…	BE	FBgn0023507		an enzyme involved in oxidation-reduction metabolism.
CG42808	protein_coding			BE	FBgn0261990		Its molecular function is unknown
RhoGAP100F	protein_coding	Rho GTPase activating protein at 100F	GO:0007165 (signal transduction), GO:0007266 (Rho protein signal transduction), GO:0045467 (R7 cell development), GO:0048789 (cytoskeletal matrix organization at active zone), GO:0048790 (maintenance of presynaptic active zone structure), GO:0048846 (axon extension involved in axon guidance), GO:0090630 (NA), GO:0097479 (synaptic vesicle localization), GO:1990709 (NA), GO:0048786 (presynaptic act…	BE	FBgn0039883		GTPase activator for the Rho-type GTPases by converting them to an inactive GDP-bound state.
bun	protein_coding	bunched	GO:0001751 (compound eye photoreceptor cell differentiation), GO:0002052 (positive regulation of neuroblast proliferation), GO:0006355 (regulation of transcription, DNA-templated), GO:0007297 (ovarian follicle cell migration), GO:0007304 (chorion-containing eggshell formation), GO:0008284 (positive regulation of cell proliferation), GO:0008340 (determination of adult lifespan), GO:0009996 (negati…	BE	FBgn0259176		Probable transcription factor required for peripheral nervous system morphogenesis, eye development and oogenesis. May be required for the transmission of the dpp signal and for a morphogenetic movement of the medulla in the brain that reorients the second optic lobe relative to the first.
Spn43Ad	protein_coding	Serpin 43Ad	GO:0010951 (negative regulation of endopeptidase activity), GO:0005615 (extracellular space), GO:0004867 (serine-type endopeptidase inhibitor activity), R-DME-109582 (Drosophila melanogaster: Hemostasis), R-DME-114608 (Drosophila melanogaster: Platelet degranulation ), R-DME-1474244 (Drosophila melanogaster: Extracellular matrix organization), R-DME-168249 (Drosophila melanogaster: Innate Immune …	BE	FBgn0044011		Predicted to be active in extracellular space. Human ortholog(s) of this gene implicated in familial encephalopathy with neuroserpin inclusion bodies.
CG9436	protein_coding		dme00052 (Galactose metabolism), dme00051 (Fructose and mannose metabolism), dme00040 (Pentose and glucuronate interconversions), dme00790 (Folate biosynthesis), dme00561 (Glycerolipid metabolism), dme01100 (Metabolic pathways), GO:0055114 (oxidation-reduction process), GO:0005829 (cytosol), GO:0004032 (alditol:NADP+ 1-oxidoreductase activity), GO:0008106 (alcohol dehydrogenase (NADP+) activity),…	BE	FBgn0033101		Aldose reductase.Predicted to enable alditol:NADP+ 1-oxidoreductase activity. Is expressed in adult head; embryonic proventriculus; embryonic/larval midgut; and organism
glob1	protein_coding	globin 1	GO:0015671 (oxygen transport), GO:0005737 (cytoplasm), GO:0005886 (plasma membrane), GO:0004601 (peroxidase activity), GO:0005506 (iron ion binding), GO:0019825 (oxygen binding), GO:0020037 (heme binding)	BE	FBgn0027657		a peroxidase involved in the response to oxidative stress and the maintenance of F-actin based cytoskeleton.
Pgi	protein_coding	Phosphoglucose isomerase	dme00010 (Glycolysis / Gluconeogenesis), dme00520 (Amino sugar and nucleotide sugar metabolism), dme01200 (Carbon metabolism), dme00500 (Starch and sucrose metabolism), dme01100 (Metabolic pathways), dme00030 (Pentose phosphate pathway), dme01250 (Biosynthesis of nucleotide sugars), GO:0006094 (gluconeogenesis), GO:0006096 (glycolytic process), GO:0042593 (glucose homeostasis), GO:0051156 (glucos…	BE	FBgn0003074		an enzyme involved in glucose homeostasis.
Nipsnap	protein_coding	Nipsnap	GO:0008150 (biological_process), GO:0005739 (mitochondrion), GO:0003674 (molecular_function)	BE	FBgn0030724		Predicted to be involved in mitochondrion organization and oxidative phosphorylation. Is expressed in adult head; adult heart; embryonic/larval midgut; gastric caecum; and organism.
Stat92E	protein_coding	Signal-transducer and activator of transcription protein at 92E	GO:0002230 (positive regulation of defense response to virus by host), GO:0006952 (defense response), GO:0006959 (humoral immune response), GO:0007259 (JAK-STAT cascade), GO:0007298 (border follicle cell migration), GO:0007350 (blastoderm segmentation), GO:0007379 (segment specification), GO:0007399 (nervous system development), GO:0007424 (open tracheal system development), GO:0007442 (hindgut m…	BE	FBgn0016917		encodes a transcription factor that shuttles between the cytosol and nucleus and functions in the JAK/STAT pathway. Its roles include proliferation, growth control, organismal metabolism, cell competition, stem cell self-renewal, immunity and developmental patterning.
CG31445	protein_coding		dme01100 (Metabolic pathways), dme00480 (Glutathione metabolism), GO:0006508 (proteolysis), GO:0043171 (peptide catabolic process), GO:0005737 (cytoplasm), GO:0008270 (zinc ion binding), GO:0042277 (peptide binding), GO:0070006 (metalloaminopeptidase activity), R-DME-1280218 (Drosophila melanogaster: Adaptive Immune System), R-DME-168256 (Drosophila melanogaster: Immune System), R-DME-983168 (Dro…	BE	FBgn0051445		Predicted to enable metalloaminopeptidase activity; peptide binding activity; and zinc ion binding activity. Is expressed in adult head.
Rchy1	protein_coding	Ring finger and CHY zinc finger domain containing 1	dme04120 (Ubiquitin mediated proteolysis), GO:0016567 (protein ubiquitination), GO:0000151 (ubiquitin ligase complex), GO:0004842 (ubiquitin-protein transferase activity), GO:0008270 (zinc ion binding), R-DME-110313 (Drosophila melanogaster: Translesion synthesis by Y family DNA polymerases bypasses lesions on DNA template), R-DME-110320 (Drosophila melanogaster: Translesion Synthesis by POLH), R…	BE	FBgn0031816		Predicted to enable ubiquitin protein ligase activity and zinc ion binding activity. Involved in negative regulation of gliogenesis.
Glut4EF	protein_coding	Glucose transporter 4 enhancer factor	GO:0003676 (nucleic acid binding)	BE	FBgn0267336		encodes a transcription factor important for developmental patterning and morphogenesis events.
Tep2	protein_coding	Thioester-containing protein 2	GO:0045087 (innate immune response), GO:0050829 (defense response to Gram-negative bacterium), GO:0005615 (extracellular space), GO:0004866 (endopeptidase inhibitor activity), R-DME-109582 (Drosophila melanogaster: Hemostasis), R-DME-114608 (Drosophila melanogaster: Platelet degranulation ), R-DME-76002 (Drosophila melanogaster: Platelet activation, signaling and aggregation), R-DME-76005 (Drosop…	BE	FBgn0041182		The product of Tep2 has endopeptidase inhibitor activity and participates in the cellular immune response to certain Gram-negative bacteria.
CG31808	protein_coding			BE	FBgn0062978		Is expressed in embryonic Malpighian tubule; embryonic/larval circulatory system; extended germ band embryo; gut section; and yolk nucleus. Its molecular function is unknown
Lime	protein_coding	Linking immunity and metabolism	GO:0008150 (biological_process), GO:0005575 (cellular_component), GO:0003674 (molecular_function), GO:0003676 (nucleic acid binding)	BE	FBgn0033458		Predicted to enable DNA-binding transcription factor activity, RNA polymerase II-specific and sequence-specific DNA binding activity.
Gbeta5	protein_coding	Gbeta5	GO:0007186 (G-protein coupled receptor signaling pathway), GO:0005886 (plasma membrane), GO:0003674 (molecular_function), R-DME-109582 (Drosophila melanogaster: Hemostasis), R-DME-111885 (Drosophila melanogaster: Opioid Signalling), R-DME-112314 (Drosophila melanogaster: Neurotransmitter receptors and postsynaptic signal transmission), R-DME-112315 (Drosophila melanogaster: Transmission across Ch…	BE	FBgn0030011		Predicted to enable signaling receptor complex adaptor activity. Is expressed in several structures, including adult external head; embryonic central brain neurons; embryonic/larval midgut; embryonic/larval nervous system; and presumptive embryonic/larval nervous system.
CG17124	protein_coding		GO:0042325 (regulation of phosphorylation), GO:0005737 (cytoplasm), GO:0004865 (protein serine/threonine phosphatase inhibitor activity), R-DME-162582 (Drosophila melanogaster: Signal Transduction), R-DME-194315 (Drosophila melanogaster: Signaling by Rho GTPases), R-DME-195258 (Drosophila melanogaster: RHO GTPase Effectors), R-DME-5625740 (Drosophila melanogaster: RHO GTPases activate PKNs)	BE	FBgn0032297		Predicted to enable protein serine/threonine phosphatase inhibitor activity. Predicted to be involved in regulation of phosphorylation.
CG10512	protein_coding		GO:0055114 (oxidation-reduction process), GO:0016491 (oxidoreductase activity)	BE	FBgn0037057		Predicted to enable oxidoreductase activity. Is expressed in adult brain; adult brain cell body rind; adult head; and yolk nucleus.
Adh	protein_coding	Alcohol dehydrogenase		BE	FBgn0000055		an alcohol and acetaldehyde dehydrogenase involved in alcohol and acetaldehyde metabolism.
CG31370	protein_coding			BE	FBgn0051370		Its molecular function is unknown
Mal-B2	protein_coding	Maltase B2	dme00500 (Starch and sucrose metabolism), dme00052 (Galactose metabolism), dme01100 (Metabolic pathways), GO:0005975 (carbohydrate metabolic process), GO:0032450 (maltose alpha-glucosidase activity)	BE	FBgn0032382		Predicted to enable maltose alpha-glucosidase activity. Predicted to be involved in carbohydrate metabolic process. Is expressed in adult head and organism.
CG31778	protein_coding		GO:0004867 (serine-type endopeptidase inhibitor activity)	BE	FBgn0051778		Predicted to enable serine-type endopeptidase inhibitor activity.
nec	protein_coding	necrotic	dme04624 (Toll and Imd signaling pathway), GO:0009620 (response to fungus), GO:0010951 (negative regulation of endopeptidase activity), GO:0045751 (negative regulation of Toll signaling pathway), GO:0045824 (negative regulation of innate immune response), GO:0045861 (negative regulation of proteolysis), GO:1900004 (negative regulation of serine-type endopeptidase activity), GO:0005615 (extracellu…	BE	FBgn0002930		encodes a hemolymphatic Serpin that negatively regulates a serine protease involved in the immune activation of the Toll pathway.
Npc2g	protein_coding	Niemann-Pick type C-2g	dme04142 (Lysosome), GO:0007498 (mesoderm development), GO:0015918 (sterol transport), GO:0032367 (intracellular cholesterol transport), GO:0005576 (extracellular region), GO:0032934 (sterol binding), R-DME-168249 (Drosophila melanogaster: Innate Immune System), R-DME-168256 (Drosophila melanogaster: Immune System), R-DME-174824 (Drosophila melanogaster: Plasma lipoprotein assembly, remodeling, a…	BE	FBgn0039800		Predicted to enable sterol binding activity. Involved in mesoderm development. Is expressed in adult head; adult heart; ...
AANATL2	protein_coding	Arylalkylamine N-acetyltransferase-like 2	GO:0005737 (cytoplasm), GO:0004059 (aralkylamine N-acetyltransferase activity), GO:0008080 (N-acetyltransferase activity), GO:0019186 (acyl-CoA N-acyltransferase activity)	BE	FBgn0031791		Catalyzes the formation of long-chain N-acylserotonins and N-acyldopamines, which are important cellular signaling lipids
mre11	protein_coding	meiotic recombination 11	dme03440 (Homologous recombination), dme03450 (Non-homologous end-joining), GO:0000723 (telomere maintenance), GO:0000724 (double-strand break repair via homologous recombination), GO:0006303 (double-strand break repair via nonhomologous end joining), GO:0007095 (mitotic G2 DNA damage checkpoint), GO:0016233 (telomere capping), GO:0031573 (intra-S DNA damage checkpoint), GO:0042138 (meiotic DNA d…	BE	FBgn0020270		encodes a protein involved in the mitotic G2 DNA damage checkpoint and telomere capping.
CG17841	protein_coding		GO:0016021 (integral component of membrane)	BE	FBgn0028480		Predicted to be involved in lipid homeostasis. Is expressed in several structures, including adult head
Sdc	protein_coding	Syndecan	GO:0007411 (axon guidance), GO:0007427 (epithelial cell migration, open tracheal system), GO:0008045 (motor neuron axon guidance), GO:0016477 (cell migration), GO:0021782 (glial cell development), GO:0045887 (positive regulation of synaptic growth at neuromuscular junction), GO:2000637 (positive regulation of gene silencing by miRNA), GO:0005886 (plasma membrane), GO:0009986 (cell surface), GO:00…	BE	FBgn0010415		encodes a transmembrane heparan sulfate proteoglycan; regulate axon guidance
CG31862	protein_coding		GO:0008150 (biological_process), GO:0005575 (cellular_component), GO:0003674 (molecular_function)	BE	FBgn0051862		Its molecular function is unknown
CG13833	protein_coding		GO:0005811 (lipid particle), R-DME-1430728 (Drosophila melanogaster: Metabolism), R-DME-162582 (Drosophila melanogaster: Signal Transduction), R-DME-193144 (Drosophila melanogaster: Estrogen biosynthesis), R-DME-196071 (Drosophila melanogaster: Metabolism of steroid hormones), R-DME-2187335 (Drosophila melanogaster: The retinoid cycle in cones (daylight vision)), R-DME-2187338 (Drosophila melanog…	BE	FBgn0039040		Predicted to enable serine-type endopeptidase activity.
CG30090	protein_coding		GO:0006508 (proteolysis), GO:0004252 (serine-type endopeptidase activity)	BE:CBS:CSE	FBgn0050090		Predicted to enable serine-type endopeptidase activity. Predicted to be involved in proteolysis
CARPB	protein_coding	Carbonic anhydrase-related protein B	GO:0004089 (carbonate dehydratase activity), GO:0008270 (zinc ion binding)	BE:CBS:CSE	FBgn0052698		Predicted to enable hydro-lyase activity. Predicted to be involved in one-carbon metabolic process
Lsp1alpha	protein_coding	Larval serum protein 1 alpha	GO:0005616 (larval serum protein complex)	BE:CBS:CSE	FBgn0002562		Larval storage protein (LSP) which may serve as a store of amino acids for synthesis of adult proteins
CG33926	protein_coding		GO:0008150 (biological_process), GO:0005575 (cellular_component), GO:0003674 (molecular_function)	BE:CBS:CSE	FBgn0053926		Its molecular function is unknown
LManI	protein_coding	Lysosomal alpha-mannosidase I	dme04142 (Lysosome), dme00511 (Other glycan degradation), GO:0006013 (mannose metabolic process), GO:0006517 (protein deglycosylation), GO:0005774 (vacuolar membrane), GO:0004559 (alpha-mannosidase activity), GO:0004571 (mannosyl-oligosaccharide 1,2-alpha-mannosidase activity), GO:0030246 (carbohydrate binding), R-DME-1430728 (Drosophila melanogaster: Metabolism), R-DME-71387 (Drosophila melanoga…	BE:CBS:CSE	FBgn0032253		Lysosomal α-mannosidase I (LManI) encodes an enzyme that is involved in mannose metabolism using p-nitrophenyl-alpha-mannoside as a substrate.
ninaD	protein_coding	neither inactivation nor afterpotential D	GO:0007602 (phototransduction), GO:0007603 (phototransduction, visible light), GO:0007604 (phototransduction, UV), GO:0016063 (rhodopsin biosynthetic process), GO:0046867 (carotenoid transport), GO:0016020 (membrane), GO:0005044 (scavenger receptor activity)	BE:CBS:CSE	FBgn0002939		neither inactivation nor afterpotential D (ninaD) encodes a scavenger receptor involved in carotenoid transport, light detection and rhodopsin biosynthesis.
CG33459	protein_coding		GO:0006508 (proteolysis), GO:0005615 (extracellular space), GO:0004252 (serine-type endopeptidase activity), R-DME-109582 (Drosophila melanogaster: Hemostasis), R-DME-140834 (Drosophila melanogaster: Extrinsic Pathway of Fibrin Clot Formation), R-DME-140837 (Drosophila melanogaster: Intrinsic Pathway of Fibrin Clot Formation), R-DME-140875 (Drosophila melanogaster: Common Pathway of Fibrin Clot F…	BE:CBS:CSE	FBgn0053459		Predicted to enable serine-type endopeptidase activity. Predicted to be involved in proteolysis.
cDIP	protein_coding	Common Dpr-interacting protein		BE:CBS:CSE	FBgn0038865		Orthologous to human NRROS (negative regulator of reactive oxygen species). (
Lsp1beta	protein_coding	Larval serum protein 1 beta	GO:0005616 (larval serum protein complex)	BE:CBS:CSE	FBgn0002563		Larval storage protein (LSP) which may serve as a store of amino acids for synthesis of adult proteins.
Lsp2	protein_coding	Larval serum protein 2	GO:0008045 (motor neuron axon guidance), GO:0016201 (synaptic target inhibition), GO:0005616 (larval serum protein complex)	BE:CBS:CSE	FBgn0002565		Larval storage protein (LSP) which may serve as a store of amino acids for synthesis of adult proteins.
CG13794	protein_coding		GO:0006836 (neurotransmitter transport), GO:0005886 (plasma membrane), GO:0016021 (integral component of membrane), GO:0043005 (neuron projection), GO:0005326 (neurotransmitter transporter activity), GO:0005328 (neurotransmitter:sodium symporter activity), GO:0005332 (gamma-aminobutyric acid:sodium symporter activity), GO:0042165 (neurotransmitter binding), R-DME-382551 (Drosophila melanogaster: …	BE:CBS:CSE	FBgn0031936		Predicted to enable gamma-aminobutyric acid:sodium symporter activity and neurotransmitter:sodium symporter activity. Predicted to be involved in neurotransmitter transport and sodium ion transmembrane transport.
CG43055	protein_coding		GO:0043152 (induction of bacterial agglutination), GO:0005576 (extracellular region), GO:0005534 (galactose binding), R-DME-168249 (Drosophila melanogaster: Innate Immune System), R-DME-168256 (Drosophila melanogaster: Immune System), R-DME-6798695 (Drosophila melanogaster: Neutrophil degranulation)	BE:CBS:CSE	FBgn0262357		Predicted to enable galactose binding activity. Predicted to be involved in induction of bacterial agglutination
tej	protein_coding	tejas	GO:0010529 (negative regulation of transposition), GO:0030717 (karyosome formation), GO:1990511 (piRNA biosynthetic process), GO:0043186 (P granule)	BE:CBS:CSE	FBgn0033921		Involved in negative regulation of transposition; oocyte karyosome formation; and piRNA biosynthetic process.
CG9119	protein_coding		GO:0008150 (biological_process), GO:0005575 (cellular_component), GO:0005634 (nucleus), GO:0008270 (zinc ion binding), GO:0016788 (hydrolase activity, acting on ester bonds)	BE:CBS:CSE	FBgn0035189		Predicted to enable hydrolase activity, acting on ester bonds and zinc ion binding activity. Predicted to be active in nucleus.
CG15369	protein_coding		GO:0004869 (cysteine-type endopeptidase inhibitor activity)	BE:CBS:CSE	FBgn0030105		Predicted to enable cysteine-type endopeptidase inhibitor activity.
CG18563	protein_coding		GO:0006508 (proteolysis), GO:0005615 (extracellular space), GO:0004252 (serine-type endopeptidase activity)	BE:CBS:CSE	FBgn0032639		Predicted to be involved in proteolysis. Predicted to be active in extracellular space.
Gnmt	protein_coding	Glycine N-methyltransferase	dme00260 (Glycine, serine and threonine metabolism), dme01100 (Metabolic pathways), GO:0006111 (regulation of gluconeogenesis), GO:0006730 (one-carbon metabolic process), GO:0008340 (determination of adult lifespan), GO:0009267 (cellular response to starvation), GO:0033353 (S-adenosylmethionine cycle), GO:0046498 (S-adenosylhomocysteine metabolic process), GO:0046500 (S-adenosylmethionine metabol…	BE:CBS:CSE	FBgn0038074		Glycine N-methyltransferase (Gnmt) encodes an enzyme that catalyzes the methylation reaction of glycine to generate sarcosine (N-methylglycine). It is abundantly expressed in the fat body and controls the amount of methyl donor S-adenosylmethionine.
lncRNA:CR43411	ncRNA	long non-coding RNA:CR43411		BE:CBS:CSE	FBgn0263330		Its molecular function is unknown
