# Supplementary material for: Genes Responsible for H2S Production and Metabolism Are Involved in Learning and Memory in Drosophila melanogaster
Source: Biomolecules. 2022 May 26;12(6):751. doi: 10.3390/biom12060751 (PMC9221306; doi:10.3390/biom12060751)
Supplement: Supplementary file 1 [file biomolecules-12-00751-s001.zip › Table S3.xlsx]

## Sheet: Sheet 1
Symbol	Biotype	Name	Annotation	group	FlyBase gene ID		annotation from flyBase
trpl	protein_coding	transient receptor potential-like	dme04745 (Phototransduction - fly), GO:0006811 (ion transport), GO:0006812 (cation transport), GO:0006816 (calcium ion transport), GO:0006828 (manganese ion transport), GO:0007589 (body fluid secretion), GO:0007603 (phototransduction, visible light), GO:0007605 (sensory perception of sound), GO:0009416 (response to light stimulus), GO:0019722 (calcium-mediated signaling), GO:0050908 (detection of…	CBS:CSE	FBgn0005614		a non-selective plasma membrane cation channel with modest Ca[2+] permeability. It is highly eye-enriched and contributes to the electrical response to light in photoreceptors.
phr	protein_coding	photorepair	GO:0000719 (photoreactive repair), GO:0003904 (deoxyribodipyrimidine photo-lyase activity)	BE:CSE	FBgn0003082		encodes a DNA photolyase apoenzyme that repairs UV-induced DNA damage
CG34215	protein_coding		GO:0051607 (defense response to virus)	BE:CSE	FBgn0085244		Its molecular function is unknown
Cpr72Ec	protein_coding	Cuticular protein 72Ec	GO:0040003 (chitin-based cuticle development), GO:0005615 (extracellular space), GO:0031012 (extracellular matrix), GO:0008010 (structural constituent of chitin-based larval cuticle), GO:0042302 (structural constituent of cuticle)	BE:CSE	FBgn0036619		A structural constituent of eye lens. Predicted to be involved in chitin-based cuticle development. Is expressed in adult head and photoreceptor neurons.
phr6-4	protein_coding	(6-4)-photolyase	GO:0003904 (deoxyribodipyrimidine photo-lyase activity)	BE:CSE	FBgn0016054		an enzyme that repairs DNA damage induced by ultraviolet light.
CG34227	protein_coding		GO:0005615 (extracellular space)	BE:CSE	FBgn0085256		Located in extracellular space. Is expressed in embryonic/larval hemolymph.
Cyp4p2	protein_coding	Cyp4p2	GO:0055114 (oxidation-reduction process), GO:0005506 (iron ion binding), GO:0016705 (oxidoreductase activity, acting on paired donors, with incorporation or reduction of molecular oxygen), GO:0020037 (heme binding), R-DME-1430728 (Drosophila melanogaster: Metabolism), R-DME-193144 (Drosophila melanogaster: Estrogen biosynthesis), R-DME-196071 (Drosophila melanogaster: Metabolism of steroid hormon…	BE:CSE	FBgn0033395		May be involved in the metabolism of insect hormones and in the breakdown of synthetic insecticides.
MsrA	protein_coding	Methionine sulfoxide reductase A	GO:0000096 (sulfur amino acid metabolic process), GO:0006979 (response to oxidative stress), GO:0008340 (determination of adult lifespan), GO:0034599 (cellular response to oxidative stress), GO:0055114 (oxidation-reduction process), GO:0005737 (cytoplasm), GO:0008113 (peptide-methionine (S)-S-oxide reductase activity), GO:0036456 (L-methionine-(S)-S-oxide reductase activity)	BE:CBS	FBgn0000565		Ecdysone-induced protein 28/29kD (Eip71CD) encodes a methionine-S-sulfoxide reductase involved in the response to oxidative stress. It contributes to determination of adult lifespan and neuron projection.
mbl	protein_coding	muscleblind	GO:0000381 (regulation of alternative mRNA splicing, via spliceosome), GO:0001654 (eye development), GO:0001751 (compound eye photoreceptor cell differentiation), GO:0006915 (apoptotic process), GO:0007517 (muscle organ development), GO:0010468 (regulation of gene expression), GO:0042052 (rhabdomere development), GO:0045924 (regulation of female receptivity), GO:0046716 (muscle cell cellular home…	BE:CBS	FBgn0265487		muscleblind (mbl) encodes an RNA binding protein that regulates RNA metabolism at the levels of alternative splicing, transcript localization and miRNA and circRNA biogenesis. It contributes to terminal muscle, eye and neural differentiation.
CG12116	protein_coding		dme00790 (Folate biosynthesis), dme01100 (Metabolic pathways), dme01240 (Biosynthesis of cofactors), GO:0006729 (tetrahydrobiopterin biosynthetic process), GO:0004757 (sepiapterin reductase activity)	BE:CBS	FBgn0030041		Sepiapterin reductase. Predicted to enable sepiapterin reductase activity. Predicted to be involved in tetrahydrobiopterin biosynthetic process.
Top3beta	protein_coding	Topoisomerase 3beta	dme03460 (Fanconi anemia pathway), dme03440 (Homologous recombination), GO:0006265 (DNA topological change), GO:0051965 (positive regulation of synapse assembly), GO:0005634 (nucleus), GO:0003677 (DNA binding), GO:0003916 (DNA topoisomerase activity), GO:0003917 (DNA topoisomerase type I activity)	BE:CBS	FBgn0026015		Topoisomerase 3β (Top3β) encodes an RNA topoisomerase that participates in both transcription and translation. It promotes transcription by being recruited by the product of Tdrd3, an epigenetic reader recognizing dimethylarginine motifs in core histones.
Irk3	protein_coding	Inwardly rectifying potassium channel 3	GO:0006813 (potassium ion transport), GO:0035220 (wing disc development), GO:0042391 (regulation of membrane potential), GO:1990573 (NA), GO:0016021 (integral component of membrane), GO:0005242 (inward rectifier potassium channel activity), R-DME-112314 (Drosophila melanogaster: Neurotransmitter receptors and postsynaptic signal transmission), R-DME-112315 (Drosophila melanogaster: Transmission a…	BE:CBS	FBgn0032706		Inwardly rectifying potassium channel 3 (Irk3) encodes a protein involved in wing disc development.
Hpd	protein_coding	4-hydroxyphenylpyruvate dioxygenase	dme00360 (Phenylalanine metabolism), dme01100 (Metabolic pathways), dme01240 (Biosynthesis of cofactors), dme00350 (Tyrosine metabolism), dme00130 (Ubiquinone and other terpenoid-quinone biosynthesis), GO:0006572 (tyrosine catabolic process), GO:0055114 (oxidation-reduction process), GO:0000139 (Golgi membrane), GO:0005789 (endoplasmic reticulum membrane), GO:0003868 (4-hydroxyphenylpyruvate diox…	BE:CBS	FBgn0036992		4-hydroxyphenylpyruvate dioxygenase; Predicted to be involved in tyrosine catabolic process.Is expressed in adult head
CG15784	protein_coding		GO:0008150 (biological_process), GO:0005575 (cellular_component), GO:0003674 (molecular_function)	BE:CBS	FBgn0029766		4-hydroxyphenylpyruvate dioxygenase; Predicted to be involved in tyrosine catabolic process.Is expressed in adult head
Rh6	protein_coding	Rhodopsin 6		BE:CBS	FBgn0019940		Rhodopsin 6 (Rh6) encodes a visual GPCR opsin that covalently binds the chromophore retinal. A photon of light stimulates the isomerization of retinal resulting in a conformational change in the product of Rh6 and signal activation. Its peak sensitivity is in the green and it is expressed in a subclass of R8 photoreceptors.
squ	protein_coding	squash	GO:0031047 (gene silencing by RNA), GO:0046843 (dorsal appendage formation), GO:0048477 (oogenesis), GO:0043186 (P granule)	CSE	FBgn0267347		squash (squ) encodes a protein acting in the piRNA pathway that responds to transposase activity in the germline. [Date last reviewed: 2019-03-14] (FlyBase Gene Snapshot)
Spn47C	protein_coding	Serpin 47C	GO:0010951 (negative regulation of endopeptidase activity), GO:0032504 (multicellular organism reproduction), GO:0005615 (extracellular space), GO:0004867 (serine-type endopeptidase inhibitor activity), R-DME-109582 (Drosophila melanogaster: Hemostasis), R-DME-114608 (Drosophila melanogaster: Platelet degranulation ), R-DME-1474244 (Drosophila melanogaster: Extracellular matrix organization), R-D…	CSE	FBgn0033574		Involved in multicellular organism reproduction. Predicted to be active in extracellular space. Is expressed in adult head and spermatozoon. Human ortholog(s) of this gene implicated in several diseases, including artery disease (multiple); autoimmune disease (multiple); diabetic retinopathy (multiple); liver disease (multiple); and lung disease (multiple). Orthologous to several human genes incl…
CG4476	protein_coding		GO:0003333 (amino acid transmembrane transport), GO:0006836 (neurotransmitter transport), GO:0007632 (visual behavior), GO:0005886 (plasma membrane), GO:0016021 (integral component of membrane), GO:0005283 (sodium:amino acid symporter activity), GO:0005326 (neurotransmitter transporter activity), GO:0005328 (neurotransmitter:sodium symporter activity), GO:0005416 (cation:amino acid symporter acti…	CSE	FBgn0035969		CG4476 encodes an orphan member of the SLC6 family of transporters that includes the plasma membrane serotonin and dopamine transporters. CG4476 mutants show a decreased behavioral response to light. [Date last reviewed: 2019-03-07]
CG30091	protein_coding		GO:0006508 (proteolysis), GO:0004252 (serine-type endopeptidase activity)	CSE	FBgn0050091		Predicted to enable serine-type endopeptidase activity. Predicted to be involved in proteolysis.
lncRNA:CR13130	ncRNA	long non-coding RNA:CR13130		CSE	FBgn0040965		Its molecular function is unknown.
CG31205	protein_coding		GO:0006508 (proteolysis)	CBS	FBgn0051205		Predicted to be involved in proteolysis. Is expressed in adult fat body.
mthl8	protein_coding	methuselah-like 8	GO:0007186 (G-protein coupled receptor signaling pathway), GO:0008340 (determination of adult lifespan), GO:0042594 (response to starvation), GO:0016021 (integral component of membrane), GO:0004930 (G-protein coupled receptor activity)	CBS	FBgn0052475		Predicted to enable G protein-coupled receptor activity. Predicted to be integral component of membrane.
eco	protein_coding	Establishment of cohesion	GO:0006275 (regulation of DNA replication), GO:0007062 (sister chromatid cohesion), GO:0007064 (mitotic sister chromatid cohesion), GO:0016573 (histone acetylation), GO:0034421 (post-translational protein acetylation), GO:0045132 (meiotic chromosome segregation), GO:0000790 (nuclear chromatin), GO:0016407 (acetyltransferase activity), R-DME-1640170 (Drosophila melanogaster: Cell Cycle), R-DME-246…	CBS	FBgn0035766		Acetyltransferase required for the establishment of sister chromatid cohesion and couple the processes of cohesion and DNA replication to ensure that only sister chromatids become paired together.
CG31219	protein_coding		GO:0006508 (proteolysis), GO:0004252 (serine-type endopeptidase activity)	CBS	FBgn0051219		Predicted to be involved in regulation of transcription, DNA-templated. Predicted to be located in nucleus. Is expressed in organism.
CG7386	protein_coding		GO:0006355 (regulation of transcription, DNA-templated), GO:0005634 (nucleus), GO:0003677 (DNA binding), GO:0003700 (sequence-specific DNA binding transcription factor activity), GO:0008270 (zinc ion binding)	CBS	FBgn0035691		Predicted to be involved in regulation of transcription, DNA-templated. Predicted to be located in nucleus. Is expressed in organism.
CG42329	protein_coding		GO:0016747 (transferase activity, transferring acyl groups other than amino-acyl groups)	CBS	FBgn0259229		Predicted to enable acyltransferase activity, transferring groups other than amino-acyl groups. Is expressed in adult fat body.
Obp56d	protein_coding	Odorant-binding protein 56d	GO:0007606 (sensory perception of chemical stimulus), GO:0007608 (sensory perception of smell), GO:0019236 (response to pheromone), GO:0042048 (olfactory behavior), GO:0005576 (extracellular region), GO:0005549 (odorant binding)	CBS	FBgn0034470		Present in the aqueous fluid surrounding olfactory sensory dendrites and are thought to aid in the capture and transport of hydrophobic odorants into and through this fluid.
				CBS	FBgn0010381
CG17260	protein_coding		GO:0008150 (biological_process), GO:0005575 (cellular_component), GO:0008270 (zinc ion binding)	CBS	FBgn0031498		Predicted to enable zinc ion binding activity. Is expressed in organism.
CG16713	protein_coding		GO:0004867 (serine-type endopeptidase inhibitor activity)	CBS	FBgn0031560		Predicted to enable serine-type endopeptidase inhibitor activity.
CG31664	protein_coding			CBS	FBgn0051664		Molecular Function is unknown
fipi	protein_coding	factor of interpulse interval		CBS	FBgn0031627		Involved in male courtship behavior, veined wing generated song production. Predicted to be active in neuron projection. Is expressed in adult head.
CG13704	protein_coding			CBS	FBgn0035583		Enables structural molecule activity. Involved in establishment of endothelial barrier and smooth septate junction assembly.
CG11034	protein_coding		GO:0006508 (proteolysis), GO:0008236 (serine-type peptidase activity), GO:0008239 (dipeptidyl-peptidase activity)	CBS	FBgn0031741		Enables dipeptidyl-peptidase activity. Predicted to be involved in proteolysis. Is expressed in adult head.
Rab32	protein_coding	Rab32	GO:0006727 (ommochrome biosynthetic process), GO:0006856 (eye pigment precursor transport), GO:0006886 (intracellular protein transport), GO:0008057 (eye pigment granule organization), GO:0010506 (regulation of autophagy), GO:0010883 (regulation of lipid storage), GO:0016192 (vesicle-mediated transport), GO:0032482 (Rab protein signal transduction), GO:0048072 (compound eye pigmentation), GO:1901…	CBS	FBgn0002567		encodes a small GTPase that contributes to vesicle trafficking regulation. It is involved in eye development, autophagy and lipid storage.
mv	protein_coding	mauve	GO:0006909 (phagocytosis), GO:0007040 (lysosome organization), GO:0045771 (negative regulation of autophagic vacuole size)	CBS	FBgn0265988		Proteins in this family function to restrain the size of lysosomes and lysosome-related organelles.
subdued	protein_coding	subdued	GO:0006821 (chloride transport), GO:0050829 (defense response to Gram-negative bacterium), GO:0050965 (detection of temperature stimulus involved in sensory perception of pain), GO:0005229 (intracellular calcium activated chloride channel activity), GO:0005247 (voltage-gated chloride channel activity), GO:0046983 (protein dimerization activity), GO:0097603 (temperature-gated ion channel activity)	CBS	FBgn0038721		encodes a chloride ion channel activated by calcium and heat belonging to the TMEM16 family. Its roles include host defense against ingested pathogenic bacteria and modulation of sensory neuronal signaling.
CG7888	protein_coding		GO:0003333 (amino acid transmembrane transport), GO:0015171 (amino acid transmembrane transporter activity), R-DME-1430728 (Drosophila melanogaster: Metabolism), R-DME-352230 (Drosophila melanogaster: Amino acid transport across the plasma membrane), R-DME-382551 (Drosophila melanogaster: Transport of small molecules), R-DME-425393 (Drosophila melanogaster: Transport of inorganic cations/anions a…	CBS	FBgn0036116		Predicted to enable amino acid transmembrane transporter activity. Is expressed in adult abdomen; adult head..
tfc	protein_coding	triforce	GO:0030246 (carbohydrate binding), R-DME-168249 (Drosophila melanogaster: Innate Immune System), R-DME-168256 (Drosophila melanogaster: Immune System), R-DME-6798695 (Drosophila melanogaster: Neutrophil degranulation)	CBS	FBgn0035199		Predicted to enable carbohydrate binding activity
CG9674	protein_coding		dme01230 (Biosynthesis of amino acids), dme00910 (Nitrogen metabolism), dme00250 (Alanine, aspartate and glutamate metabolism), dme01100 (Metabolic pathways), GO:0006537 (glutamate biosynthetic process), GO:0019676 (ammonia assimilation cycle), GO:0055114 (oxidation-reduction process), GO:0005506 (iron ion binding), GO:0010181 (FMN binding), GO:0016040 (glutamate synthase (NADH) activity), GO:005…	CBS	FBgn0036663		Predicted to enable glutamate synthase (NADH) activity. Is expressed in adult head and spermatozoon.
CkIIalpha-i3	protein_coding	CKII-alpha subunit interactor-3	GO:0008150 (biological_process), GO:0005575 (cellular_component), GO:0003674 (molecular_function)	CBS	FBgn0025676		Is expressed in olfactory sensory organ. Molecular Function is unknown
bdl	protein_coding	borderless	GO:0007156 (homophilic cell adhesion via plasma membrane adhesion molecules), GO:0007158 (neuron cell-cell adhesion), GO:0007411 (axon guidance), GO:0008366 (axon ensheathment), GO:0042065 (glial cell growth), GO:0045467 (R7 cell development), GO:0070593 (dendrite self-avoidance), GO:0005886 (plasma membrane), GO:0005887 (integral component of plasma membrane), GO:0030424 (axon), GO:0098632 (prot…	CBS	FBgn0028482		a cell adhesion molecule that is required for glial extension and axon ensheathment. is required for photoreceptor axonal tiling
CG5966	protein_coding		GO:0016042 (lipid catabolic process), GO:0005615 (extracellular space), GO:0016298 (lipase activity), GO:0052689 (carboxylic ester hydrolase activity), R-DME-192456 (Drosophila melanogaster: Digestion of dietary lipid), R-DME-8935690 (Drosophila melanogaster: Digestion), R-DME-8963743 (Drosophila melanogaster: Digestion and absorption)	CBS	FBgn0029831		Predicted to enable lipase activity. Is expressed in several structures, including adult head
CG34138	protein_coding			CBS	FBgn0083974		Molecular Function is unknown
GstE5	protein_coding	Glutathione S transferase E5	dme00980 (Metabolism of xenobiotics by cytochrome P450), dme00982 (Drug metabolism - cytochrome P450), dme00480 (Glutathione metabolism), dme00983 (Drug metabolism - other enzymes), dme01100 (Metabolic pathways), GO:0006749 (glutathione metabolic process), GO:0005737 (cytoplasm), GO:0004364 (glutathione transferase activity)	CBS	FBgn0063495		Enables glutathione transferase activity.
Rh2	protein_coding	Rhodopsin 2	GO:0007186 (G-protein coupled receptor signaling pathway), GO:0007601 (visual perception), GO:0007602 (phototransduction), GO:0005887 (integral component of plasma membrane), GO:0016021 (integral component of membrane), GO:0004930 (G-protein coupled receptor activity), GO:0008020 (G-protein coupled photoreceptor activity), R-DME-162582 (Drosophila melanogaster: Signal Transduction), R-DME-372790 …	CBS	FBgn0003248		encodes a light sensitive GPCR Rhodopsin protein that activates the phototransduction cascade and leads to photoreceptor depolarization.
Mis12	protein_coding	Mis12	GO:0007059 (chromosome segregation), GO:0007079 (mitotic chromosome movement towards spindle pole), GO:0007080 (mitotic metaphase plate congression), GO:0000775 (chromosome, centromeric region), GO:0000776 (kinetochore), GO:0031262 (Ndc80 complex)	CBS	FBgn0035725		encodes a protein involved in chromosome movement and metaphase plate congression during mitosis.
CG8736	protein_coding		GO:0042302 (structural constituent of cuticle)	CBS	FBgn0033308		Predicted to be a structural constituent of cuticle. Is expressed in dorsal head epidermis and larval foregut atrium.
htt	protein_coding	huntingtin	GO:0000132 (establishment of mitotic spindle orientation), GO:0008088 (axon cargo transport), GO:0033697 (positive regulation of extent of heterochromatin assembly), GO:0048489 (synaptic vesicle transport), GO:0005737 (cytoplasm)	CBS	FBgn0027655		encodes a scaffold protein involved in mitotic spindle orientation, chromatin regulation and axonal transport.
Col4a1	protein_coding	Collagen type IV alpha 1	dme04512 (ECM-receptor interaction), GO:0007391 (dorsal closure), GO:0030198 (extracellular matrix organization), GO:0035848 (oviduct morphogenesis), GO:0048621 (post-embryonic digestive tract morphogenesis), GO:0055013 (cardiac muscle cell development), GO:0060729 (intestinal epithelial structure maintenance), GO:0071711 (basement membrane organization), GO:0005581 (collagen trimer), GO:0005587 …	CBS	FBgn0000299		encodes a subunit of Collagen IV, is required for muscle and epithelium integrity.
Dlc90F	protein_coding	Dynein light chain 90F	GO:0000278 (mitotic cell cycle), GO:0007286 (spermatid development), GO:0008090 (retrograde axon cargo transport), GO:0008340 (determination of adult lifespan), GO:0005868 (cytoplasmic dynein complex), GO:0030286 (dynein complex), GO:0042803 (protein homodimerization activity), GO:0045505 (dynein intermediate chain binding), GO:0051959 (dynein light intermediate chain binding), R-DME-168249 (Dros…	CBS	FBgn0024432		encodes a light chain subunit of the cytoplasmic dynein complex
Myo10A	protein_coding	Myosin 10A	GO:0006886 (intracellular protein transport), GO:0007391 (dorsal closure), GO:0046847 (filopodium assembly), GO:0016459 (myosin complex), GO:0030175 (filopodium), GO:0043025 (neuronal cell body), GO:0003774 (motor activity), GO:0005515 (protein binding), GO:0005524 (ATP binding)	CBS	FBgn0263705		an unconventional myosin of the MyTH-FERM superclass that traffics sensory, cytoskeletal, and adhesion cargos. It is required during dorsal closure for proper epithelial alignment and for zippering and fusion of the two epithelial sheets. [Date last reviewed: 2019-03-14] (FlyBase Gene Snapshot)
CG13707	protein_coding			CBS	FBgn0035578		Is expressed in antennal disc; eye disc; ventral thoracic disc; and wing disc.
sgl	protein_coding	sugarless	dme00040 (Pentose and glucuronate interconversions), dme00520 (Amino sugar and nucleotide sugar metabolism), dme00053 (Ascorbate and aldarate metabolism), dme01250 (Biosynthesis of nucleotide sugars), dme01240 (Biosynthesis of cofactors), dme01100 (Metabolic pathways), GO:0006024 (glycosaminoglycan biosynthetic process), GO:0007367 (segment polarity determination), GO:0007427 (epithelial cell mig…	CBS	FBgn0261445		Involved in the biosynthesis of glycosaminoglycans; hyaluronan, chondroitin sulfate and heparan sulfate. Required for wingless signaling in different tissues.
boss	protein_coding	bride of sevenless	dme04013 (MAPK signaling pathway - fly), GO:0007186 (G-protein coupled receptor signaling pathway), GO:0007465 (R7 cell fate commitment), GO:0007601 (visual perception), GO:0009749 (response to glucose), GO:0042593 (glucose homeostasis), GO:0045470 (R8 cell-mediated photoreceptor organization), GO:0045500 (sevenless signaling pathway), GO:0055088 (lipid homeostasis), GO:0005887 (integral componen…	CBS	FBgn0000206		Acts as a ligand for sevenless tyrosine-kinase receptor during eye development.
to	protein_coding	takeout	GO:0007617 (mating behavior), GO:0007622 (rhythmic behavior), GO:0007623 (circadian rhythm), GO:0007631 (feeding behavior), GO:0008049 (male courtship behavior), GO:0008343 (adult feeding behavior), GO:0042594 (response to starvation), GO:0042595 (behavioral response to starvation), GO:0005576 (extracellular region), GO:0005615 (extracellular space), GO:0003674 (molecular_function)	BE	FBgn0039298		Involved in male courtship behavior. Participates in a novel circadian output pathway that conveys temporal and food status information to feeding-relevant metabolisms and activities.
CG31810	protein_coding			BE	FBgn0051810		Predicted to enable oxidoreductase activity.
CG11854	protein_coding		GO:0005615 (extracellular space)	BE	FBgn0039299		Predicted to be involved in multicellular organism reproduction.
TotM	protein_coding	Turandot M	GO:0009408 (response to heat), GO:0009617 (response to bacterium), GO:0034605 (cellular response to heat), GO:0050830 (defense response to Gram-positive bacterium), GO:0005576 (extracellular region), GO:0005615 (extracellular space)	BE	FBgn0031701		belongs to a class of poorly characterized secreted peptides. Some Turandot genes are expressed in response to stress in the fat body by the JAK-STAT pathway.
Dgat2	protein_coding	Diacylglycerol O-acyltransferase 2	dme01100 (Metabolic pathways), dme00561 (Glycerolipid metabolism), GO:0007498 (mesoderm development), GO:0034389 (lipid particle organization), GO:0016747 (transferase activity, transferring acyl groups other than amino-acyl groups), R-DME-1430728 (Drosophila melanogaster: Metabolism), R-DME-1482883 (Drosophila melanogaster: Acyl chain remodeling of DAG and TAG), R-DME-1483206 (Drosophila melanog…	BE	FBgn0033215		Predicted to enable O-acyltransferase activity. Involved in lipid droplet organization. Is expressed in adult head; etc
aurB	protein_coding	aurora B	GO:0000070 (mitotic sister chromatid segregation), GO:0000281 (mitotic cytokinesis), GO:0006325 (chromatin organization), GO:0007052 (mitotic spindle organization), GO:0007076 (mitotic chromosome condensation), GO:0007094 (mitotic spindle assembly checkpoint), GO:0016572 (histone phosphorylation), GO:0030261 (chromosome condensation), GO:0032465 (regulation of cytokinesis), GO:0032467 (positive r…	BE	FBgn0024227		encodes a serine-threonine kinase and member of the chromosomal passenger complex
CG12963	protein_coding			BE	FBgn0034031		Molecular Function is unknown
CG15153	protein_coding		GO:0008150 (biological_process), GO:0005575 (cellular_component), GO:0003674 (molecular_function)	BE	FBgn0032663		Molecular Function is unknown
CG4630	protein_coding		GO:0055085 (transmembrane transport), GO:0016021 (integral component of membrane), GO:0022857 (transmembrane transporter activity)	BE	FBgn0033809		Predicted to enable transmembrane transporter activity.
CG30334	protein_coding		GO:0008150 (biological_process), GO:0005575 (cellular_component), GO:0003674 (molecular_function)	BE	FBgn0050334		Molecular Function is unknown
CG10702	protein_coding		GO:0006468 (protein phosphorylation), GO:0007169 (transmembrane receptor protein tyrosine kinase signaling pathway), GO:0007411 (axon guidance), GO:0005887 (integral component of plasma membrane), GO:0043005 (neuron projection), GO:0043235 (receptor complex), GO:0004714 (transmembrane receptor protein tyrosine kinase activity), GO:0005005 (transmembrane-ephrin receptor activity), GO:0005524 (ATP …	BE	FBgn0032752		Is expressed in several structures, including CNS glial cell; Molecular Function is unknown
CG5921	protein_coding		GO:0000086 (G2/M transition of mitotic cell cycle), GO:0007605 (sensory perception of sound), GO:0046549 (retinal cone cell development), GO:0050953 (sensory perception of light stimulus), GO:1904970 (NA), GO:0001917 (photoreceptor inner segment), GO:0002141 (stereocilia ankle link), GO:0002142 (stereocilia ankle link complex), GO:0005886 (plasma membrane), GO:0032391 (photoreceptor connecting ci…	BE	FBgn0029835		Predicted to enable spectrin binding activity. Predicted to be involved in G2/M transition of mitotic cell cycle.
Ir76a	protein_coding	Ionotropic receptor 76a	GO:0019226 (transmission of nerve impulse), GO:0050907 (detection of chemical stimulus involved in sensory perception), GO:0050911 (detection of chemical stimulus involved in sensory perception of smell), GO:0016021 (integral component of membrane), GO:0043235 (receptor complex), GO:0071683 (sensory dendrite), GO:0004984 (olfactory receptor activity), GO:0015276 (ligand-gated ion channel activity)	BE	FBgn0260874		Contributes to olfactory receptor activity. Located in sensory dendrite. Part of receptor complex
CG11852	protein_coding		GO:0005615 (extracellular space)	BE	FBgn0039297		Predicted to be involved in multicellular organism reproduction.
grass	protein_coding	Gram-positive Specific Serine protease	dme04624 (Toll and Imd signaling pathway), GO:0002804 (positive regulation of antifungal peptide production), GO:0006508 (proteolysis), GO:0006963 (positive regulation of antibacterial peptide biosynthetic process), GO:0045087 (innate immune response), GO:0045752 (positive regulation of Toll signaling pathway), GO:0050830 (defense response to Gram-positive bacterium), GO:0050832 (defense response…	BE	FBgn0039494		encodes a secreted serine protease that is involved downstream of the microbial sensing receptors encoded by GNBP3 and PGRP-SA in the activation of the Toll pathway during the immune response.
CG42397	protein_coding		GO:0006030 (chitin metabolic process), GO:0005576 (extracellular region), GO:0008061 (chitin binding)	BE	FBgn0259748		Predicted to enable chitin binding activity.
Cht4	protein_coding	Chitinase 4	dme01100 (Metabolic pathways), dme00520 (Amino sugar and nucleotide sugar metabolism), GO:0005975 (carbohydrate metabolic process), GO:0006032 (chitin catabolic process), GO:0005576 (extracellular region), GO:0005615 (extracellular space), GO:0004568 (chitinase activity), GO:0008061 (chitin binding), R-DME-189085 (Drosophila melanogaster: Digestion of dietary carbohydrate), R-DME-8935690 (Drosoph…	BE	FBgn0022700		encodes a chitin binding protein with chitinolytic activity.
Bmcp	protein_coding	Bmcp	GO:0007605 (sensory perception of sound), GO:0008272 (sulfate transport), GO:0015709 (thiosulfate transport), GO:0015729 (oxaloacetate transport), GO:0019222 (regulation of metabolic process), GO:0035435 (phosphate ion transmembrane transport), GO:0071422 (succinate transmembrane transport), GO:0071423 (malate transmembrane transport), GO:0005743 (mitochondrial inner membrane), GO:0015116 (sulfat…	BE	FBgn0036199		Regulates metabolic homeostasis in response to nutritional cues and may therefore be involved in adaptation to dietary variations.
E(spl)mbeta-HLH	protein_coding	Enhancer of split mbeta, helix-loop-helix	GO:0000122 (negative regulation of transcription from RNA polymerase II promoter), GO:0002052 (positive regulation of neuroblast proliferation), GO:0009952 (anterior/posterior pattern specification), GO:0030154 (cell differentiation), GO:0050767 (regulation of neurogenesis), GO:1902692 (regulation of neuroblast proliferation), GO:0005634 (nucleus), GO:0000977 (RNA polymerase II regulatory region …	BE	FBgn0002733		Contributes to the neural-epidermal lineage decision during early neurogenesis
CG13325	protein_coding		GO:0016747 (transferase activity, transferring acyl groups other than amino-acyl groups)	BE	FBgn0033792		Predicted to enable acyltransferase activity, transferring groups other than amino-acyl groups.
CG2915	protein_coding		GO:0006508 (proteolysis), GO:0005576 (extracellular region), GO:0005615 (extracellular space), GO:0012505 (endomembrane system), GO:0031982 (vesicle), GO:0004181 (metallocarboxypeptidase activity), GO:0008270 (zinc ion binding)	BE	FBgn0033241		Predicted to enable metallocarboxypeptidase activity. Predicted to be involved in proteolysis. Located in vesicle.
Mdr50	protein_coding	Multi drug resistance 50	dme02010 (ABC transporters), GO:0009636 (response to toxic substance), GO:0017085 (response to insecticide), GO:0042908 (xenobiotic transport), GO:0055085 (transmembrane transport), GO:0097254 (renal tubular secretion), GO:0005886 (plasma membrane), GO:0016021 (integral component of membrane), GO:0043190 (ATP-binding cassette (ABC) transporter complex), GO:0005524 (ATP binding), GO:0008559 (xenob…	BE	FBgn0010241		Predicted to enable ABC-type xenobiotic transporter activity and efflux transmembrane transporter activity. Involved in renal tubular secretion and response to insecticide.
CG15255	protein_coding		GO:0006508 (proteolysis), GO:0004222 (metalloendopeptidase activity), GO:0008270 (zinc ion binding)	BE	FBgn0028950		Predicted to enable metalloendopeptidase activity. Predicted to be involved in proteolysis.
			GO:0001555 (oocyte growth), GO:0003344 (pericardium morphogenesis), GO:0006909 (phagocytosis), GO:0007157 (heterophilic cell-cell adhesion via plasma membrane cell adhesion molecules), GO:0007160 (cell-matrix adhesion), GO:0007391 (dorsal closure), GO:0007411 (axon guidance), GO:0007431 (salivary gland development), GO:0007494 (midgut development), GO:0007508 (larval heart development), GO:000761…	BE	FBgn0003328
CG34232	protein_coding		GO:0008150 (biological_process), GO:0005575 (cellular_component), GO:0003674 (molecular_function)	BE	FBgn0085261		Is expressed in embryonic/larval posterior spiracle and posterior spiracle primordium. Molecular Function is unknown
CG10650	protein_coding			BE	FBgn0046302		Is expressed in adult head; embryonic midgut chamber; and embryonic/larval midgut. Molecular Function is unknown
Crys	protein_coding	Crystallin	GO:0007601 (visual perception), GO:0048058 (compound eye corneal lens development), GO:0005576 (extracellular region), GO:0031012 (extracellular matrix), GO:0005212 (structural constituent of eye lens), GO:0005509 (calcium ion binding), GO:0042302 (structural constituent of cuticle)	BE	FBgn0005664		encodes a chitin binding protein involved in the formation of the peritrophic matrix, a chitinous layer lining the midgut enables calcium ion binding
CG1698	protein_coding		GO:0003333 (amino acid transmembrane transport), GO:0006836 (neurotransmitter transport), GO:0005886 (plasma membrane), GO:0016021 (integral component of membrane), GO:0005283 (sodium:amino acid symporter activity), GO:0005326 (neurotransmitter transporter activity), GO:0005328 (neurotransmitter:sodium symporter activity), GO:0005416 (cation:amino acid symporter activity), GO:0015179 (L-amino aci…	BE	FBgn0033443		Predicted to enable L-amino acid transmembrane transporter activity; amino acid:cation symporter activity; and neurotransmitter transmembrane transporter activity.
CG12224	protein_coding		GO:0005829 (cytosol), GO:0016491 (oxidoreductase activity)	BE	FBgn0037974		Predicted to enable D-arabinose 1-dehydrogenase [NAD(P)+] activity.
Damm	protein_coding	Death associated molecule related to Mch2 caspase	GO:0006508 (proteolysis), GO:0006915 (apoptotic process), GO:0012501 (programmed cell death), GO:0005737 (cytoplasm), GO:0004197 (cysteine-type endopeptidase activity), GO:0097153 (cysteine-type endopeptidase activity involved in apoptotic process), R-DME-109581 (Drosophila melanogaster: Apoptosis), R-DME-109606 (Drosophila melanogaster: Intrinsic Pathway for Apoptosis), R-DME-111465 (Drosophila …	BE	FBgn0033659		Death associated molecule related to Mch2 caspase (Damm) encodes one of the seven members of the caspase family of cysteine proteases.
CG8401	protein_coding		GO:0008150 (biological_process), GO:0005829 (cytosol), GO:0016020 (membrane), GO:0003674 (molecular_function)	BE	FBgn0034069		Predicted to be active in cytosol and membrane.
HemK1	protein_coding	HemK methyltransferase 1	GO:0006479 (protein methylation), GO:0003676 (nucleic acid binding), GO:0008276 (protein methyltransferase activity)	BE	FBgn0031817		Predicted to enable nucleic acid binding activity and protein methyltransferase activity. Predicted to be involved in protein methylation.
Ugt37A3	protein_coding	UDP-glycosyltransferase family 37 member A3	dme00040 (Pentose and glucuronate interconversions), dme00860 (Porphyrin metabolism), dme01240 (Biosynthesis of cofactors), dme00830 (Retinol metabolism), dme00983 (Drug metabolism - other enzymes), dme00980 (Metabolism of xenobiotics by cytochrome P450), dme01100 (Metabolic pathways), dme00053 (Ascorbate and aldarate metabolism), dme00982 (Drug metabolism - cytochrome P450), GO:0043231 (intracel…	BE	FBgn0038083		Predicted to enable UDP-glycosyltransferase activity. Is expressed in adult head.
CG12560	protein_coding		GO:0016573 (histone acetylation), GO:0016747 (transferase activity, transferring acyl groups other than amino-acyl groups)	BE	FBgn0031974		Predicted to enable N-acetyltransferase activity. Involved in histone acetylation.
CG11878	protein_coding			BE	FBgn0039310		Is expressed in adult head. Molecular Function is unknown
CG5535	protein_coding		GO:0003333 (amino acid transmembrane transport), GO:0097638 (L-arginine import across plasma membrane), GO:1903352 (L-ornithine transmembrane transport), GO:0016020 (membrane), GO:0000064 (L-ornithine transmembrane transporter activity), GO:0015171 (amino acid transmembrane transporter activity), GO:0015181 (arginine transmembrane transporter activity), GO:0015189 (L-lysine transmembrane transpor…	BE	FBgn0036764		Predicted to enable L-lysine transmembrane transporter activity and L-ornithine transmembrane transporter activity. Predicted to be involved in L-arginine import across plasma membrane and L-ornithine transmembrane transport.
Spn42Dc	protein_coding	Serpin 42Dc	GO:0010951 (negative regulation of endopeptidase activity), GO:0045861 (negative regulation of proteolysis), GO:0005615 (extracellular space), GO:0004867 (serine-type endopeptidase inhibitor activity), R-DME-109582 (Drosophila melanogaster: Hemostasis), R-DME-114608 (Drosophila melanogaster: Platelet degranulation ), R-DME-1474244 (Drosophila melanogaster: Extracellular matrix organization), R-DM…	BE	FBgn0033113		Predicted to contribute to serine-type endopeptidase inhibitor activity. Predicted to be involved in negative regulation of endopeptidase activity and negative regulation of interleukin-1 beta production.
Cyp6a2	protein_coding	Cytochrome P450-6a2	GO:0031000 (response to caffeine), GO:0046680 (response to DDT), GO:0055114 (oxidation-reduction process), GO:0005506 (iron ion binding), GO:0016705 (oxidoreductase activity, acting on paired donors, with incorporation or reduction of molecular oxygen), GO:0020037 (heme binding)	BE:CBS:CSE	FBgn0000473		Is involved in the breakdown of synthetic insecticides and may be involved in the metabolism of insect hormones.
CG10550	protein_coding		GO:0005575 (cellular_component), GO:0003674 (molecular_function)	BE:CBS:CSE	FBgn0039321		The biological processes in which it is involved are not known. Is expressed in adult head and spermatozoon.
Nepl5	protein_coding	Neprilysin-like 5	GO:0006508 (proteolysis), GO:0004222 (metalloendopeptidase activity), R-DME-168249 (Drosophila melanogaster: Innate Immune System), R-DME-168256 (Drosophila melanogaster: Immune System), R-DME-2022377 (Drosophila melanogaster: Metabolism of Angiotensinogen to Angiotensins), R-DME-2980736 (Drosophila melanogaster: Peptide hormone metabolism), R-DME-392499 (Drosophila melanogaster: Metabolism of pr…	BE:CBS:CSE	FBgn0031808		Predicted to be involved in protein processing. Predicted to be active in plasma membrane. Is expressed in adult head.
Ugt36E1	protein_coding	UDP-glycosyltransferase family 36 member E1	dme00982 (Drug metabolism - cytochrome P450), dme00860 (Porphyrin metabolism), dme00040 (Pentose and glucuronate interconversions), dme00983 (Drug metabolism - other enzymes), dme00053 (Ascorbate and aldarate metabolism), dme00830 (Retinol metabolism), dme01240 (Biosynthesis of cofactors), dme00980 (Metabolism of xenobiotics by cytochrome P450), dme01100 (Metabolic pathways), GO:0006011 (UDP-gluc…	BE:CBS:CSE	FBgn0027070		Predicted to enable UDP-glycosyltransferase activity. Predicted to be involved in xenobiotic metabolic process. Predicted to be located in endoplasmic reticulum. Predicted to be active in intracellular membrane-bounded organelle. Is expressed in adult head; adult heart; and organism.
CG32750	protein_coding		GO:0006807 (nitrogen compound metabolic process), GO:0008150 (biological_process), GO:0005575 (cellular_component), GO:0016811 (hydrolase activity, acting on carbon-nitrogen (but not peptide) bonds, in linear amides), R-DME-1430728 (Drosophila melanogaster: Metabolism), R-DME-168249 (Drosophila melanogaster: Innate Immune System), R-DME-168256 (Drosophila melanogaster: Immune System), R-DME-19684…	BE:CBS:CSE	FBgn0052750		Predicted to enable hydrolase activity, acting on carbon-nitrogen (but not peptide) bonds, in linear amides. Predicted to be involved in nitrogen compound metabolic process. Is expressed in adult head.
CG18467	protein_coding		GO:0043161 (proteasome-mediated ubiquitin-dependent protein catabolic process), GO:0005634 (nucleus), GO:0005737 (cytoplasm), GO:0003674 (molecular_function)	BE:CBS:CSE	FBgn0034218		Predicted to be involved in proteasome-mediated ubiquitin-dependent protein catabolic process. Predicted to be active in cytoplasm and nucleus.
Snx17	protein_coding	Sorting nexin 17	GO:0006886 (intracellular protein transport), GO:1990126 (retrograde transport, endosome to plasma membrane), GO:0005769 (early endosome), GO:0035091 (phosphatidylinositol binding)	BE:CBS:CSE	FBgn0032191		Predicted to enable phosphatidylinositol binding activity. Predicted to be involved in intracellular protein transport. Predicted to be active in early endosome.
Cyp6a9	protein_coding	Cytochrome P450-6a9		BE:CBS:CSE	FBgn0013771		Involved in the metabolism of insect hormones and in the breakdown of synthetic insecticides
